# Supplementary material for: Development and validation of a multidimensional, culturally and socially inclusive Child Resilience Questionnaire (parent/caregiver report) to measure factors that support resilience: a community-based participatory research and psychometric testing study in Australia
Source: PubMed Central journal article supplement — BMJ Open. 2022 Jun 20;12(6):e061129. doi: 10.1136/bmjopen-2022-061129 (PMC9214413; doi:10.1136/bmjopen-2022-061129), 2022-06-20
Supplement: bmjopen-2022-061129.draft_revisions.pdf [file bmjopen-2022-061129.draft_revisions.pdf]

# BMJ Open

BMJ Open is committed to open peer review. As part of this commitment we make the peer review history of every article we publish publicly available.

When an article is published we post the peer reviewers' comments and the authors' responses online. We also post the versions of the paper that were used during peer review. These are the versions that the peer review comments apply to.

The versions of the paper that follow are the versions that were submitted during the peer review process. They are not the versions of record or the final published versions. They should not be cited or distributed as the published version of this manuscript.

BMJ Open is an open access journal and the full, final, typeset and author-corrected version of record of the manuscript is available on our site with no access controls, subscription charges or pay-per-view fees (<http://bmjopen.bmj.com>).

If you have any questions on BMJ Open's open peer review process please email [info.bmjopen@bmj.com](mailto:info.bmjopen@bmj.com)

# BMJ Open

**Development of a multidimensional culturally and socially inclusive measure of factors that support child resilience: co-designed with Aboriginal and refugee background communities in Australia.**

|                               |                                                                                                                                                                                                                                                                                                                                                                                                                                                                                                                                                                                                                                                                                                                                                                                                                                                                                                          |
|-------------------------------|----------------------------------------------------------------------------------------------------------------------------------------------------------------------------------------------------------------------------------------------------------------------------------------------------------------------------------------------------------------------------------------------------------------------------------------------------------------------------------------------------------------------------------------------------------------------------------------------------------------------------------------------------------------------------------------------------------------------------------------------------------------------------------------------------------------------------------------------------------------------------------------------------------|
| Journal:                      | <i>BMJ Open</i>                                                                                                                                                                                                                                                                                                                                                                                                                                                                                                                                                                                                                                                                                                                                                                                                                                                                                          |
| Manuscript ID                 | bmjopen-2022-061129                                                                                                                                                                                                                                                                                                                                                                                                                                                                                                                                                                                                                                                                                                                                                                                                                                                                                      |
| Article Type:                 | Original research                                                                                                                                                                                                                                                                                                                                                                                                                                                                                                                                                                                                                                                                                                                                                                                                                                                                                        |
| Date Submitted by the Author: | 15-Jan-2022                                                                                                                                                                                                                                                                                                                                                                                                                                                                                                                                                                                                                                                                                                                                                                                                                                                                                              |
| Complete List of Authors:     | Gartland, Deirdre; Murdoch Children's Research Institute, Intergenerational Health; The University of Melbourne, Pediatrics<br>Riggs, Elisha; Murdoch Childrens Research Institute, Intergenerational Health; The University of Melbourne, Department of General Practice<br>Giallo, Rebecca; Murdoch Childrens Research Institute, Intergenerational Health<br>Glover, Karen; Murdoch Childrens Research Institute, Intergenerational Health; South Australian Health and Medical Research Institute Limited, Women and Kids theme<br>Stowe, Mardi; Victorian Foundation for Survivors of Torture<br>Mongta, Sharon; Djirra, Family Violence<br>Weetra, Donna; South Australian Health and Medical Research Institute Limited, Women and Families<br>Brown, Stephanie; Murdoch Children's Research Institute, Intergenerational Health; South Australian Health and Medical Research Institute Limited, |
| Keywords:                     | Community child health < PAEDIATRICS, PUBLIC HEALTH, SOCIAL MEDICINE                                                                                                                                                                                                                                                                                                                                                                                                                                                                                                                                                                                                                                                                                                                                                                                                                                     |
|                               |                                                                                                                                                                                                                                                                                                                                                                                                                                                                                                                                                                                                                                                                                                                                                                                                                                                                                                          |

SCHOLARONE™  
Manuscripts

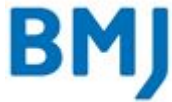

I, the Submitting Author has the right to grant and does grant on behalf of all authors of the Work (as defined in the below author licence), an exclusive licence and/or a non-exclusive licence for contributions from authors who are: i) UK Crown employees; ii) where BMJ has agreed a CC-BY licence shall apply, and/or iii) in accordance with the terms applicable for US Federal Government officers or employees acting as part of their official duties; on a worldwide, perpetual, irrevocable, royalty-free basis to BMJ Publishing Group Ltd ("BMJ") its licensees and where the relevant Journal is co-owned by BMJ to the co-owners of the Journal, to publish the Work in this journal and any other BMJ products and to exploit all rights, as set out in our [licence](#).

The Submitting Author accepts and understands that any supply made under these terms is made by BMJ to the Submitting Author unless you are acting as an employee on behalf of your employer or a postgraduate student of an affiliated institution which is paying any applicable article publishing charge ("APC") for Open Access articles. Where the Submitting Author wishes to make the Work available on an Open Access basis (and intends to pay the relevant APC), the terms of reuse of such Open Access shall be governed by a Creative Commons licence – details of these licences and which [Creative Commons](#) licence will apply to this Work are set out in our licence referred to above.

Other than as permitted in any relevant BMJ Author's Self Archiving Policies, I confirm this Work has not been accepted for publication elsewhere, is not being considered for publication elsewhere and does not duplicate material already published. I confirm all authors consent to publication of this Work and authorise the granting of this licence.

1  
2  
3  
4 **Development of a multidimensional culturally and socially inclusive measure of factors that**  
5 **support child resilience: co-designed with Aboriginal and refugee background communities in**  
6 **Australia.**  
7

8  
9 Dr D Gartland<sup>1,2</sup> (DPsych)

10  
11 Dr E Riggs<sup>1,3</sup> (PhD)

12  
13 Dr R Giallo<sup>1,3</sup> (PhD)

14  
15 Ms K Glover<sup>1,4</sup> (MBA)

16  
17 Ms M Stowe<sup>5</sup> (MSw)

18  
19 Ms S Mongta<sup>6</sup> (BSw)

20  
21 Ms Donna Weetra<sup>4</sup>

22  
23 Prof SJ Brown<sup>1, 2,3,4</sup> (PhD)

24  
25 and members of the Childhood Resilience Study Collaborative Group\*

26  
27  
28 \*(Professor Helen Herman, Professor Kelsey Hegarty, A/Professor Jane Yelland, Ms Amanda Mitchell,  
29 Ms Selena White, Ms Tanya Koolmatrie, Ms Sue Casey, Mr Josef Szwarc, A/Professor Georgie Paxton)

30  
31  
32 <sup>1</sup> Intergenerational Health Research Group, Murdoch Children's Research Institute, Parkville,  
33 Melbourne Australia.

34  
35 <sup>2</sup> Department of Paediatrics, University of Melbourne, Melbourne, Australia

36  
37 <sup>3</sup> Department of General Practice, University of Melbourne, Melbourne, Australia

38  
39 <sup>4</sup> South Australian Health and Medical Research Institute, Adelaide, Australia

40  
41 <sup>5</sup> Victorian Foundation for the Survivors of Torture, Melbourne, Australia

42  
43 <sup>6</sup> Wadja Aboriginal Family Place, Royal Children's Hospital, Melbourne, Australia

44  
45  
46  
47  
48  
49 **Keywords:** resilience, child, refugee, Indigenous, co-design, qualitative

50  
51 Corresponding Author: Dr Deirdre Gartland

52 Murdoch Children's Research Institute, 50 Flemington Rd, Parkville, Victoria, Australia 3056.

53 [deirdre.gartland@mcri.edu.au](mailto:deirdre.gartland@mcri.edu.au)

54 +61 03 9386 6618

55  
56 Words:4418  
57  
58  
59  
60

## Abstract (300)

**Objective** Develop a comprehensive and inclusive measure to assess child resilience factors, co-designed with Aboriginal and refugee background communities.

**Design** Community based participatory research methods used to develop and revise Child Resilience Questionnaire (parent/caregiver-, child-, school-report) based on a socio-ecological model of resilience. Pilot testing and validation of parent/caregiver report (CRQ-P/C) is the focus of this paper.

**Setting** Australia.

**Participants** Culturally and socially diverse parents/caregivers of children aged 5-12 years completed the CRQ-P/C for the pilot (n=489) and validation study (n=1114). Recruitment via hospital clinics, community networks (Aboriginal and bicultural researchers) and nested follow-up of participants in two prospective birth cohort studies.

**Analysis** Exploratory and confirmatory factor analyses conducted to assess the structure and construct validity of CRQ-P/C subscales. Cronbach's alpha used to assess internal consistency of subscales. Criterion validity assessed with the Strengths and Difficulties Questionnaire (SDQ) parent-report.

**Results** Conceptually developed CRQ comprised 169 items in 19 subscales across five socio-ecological domains (self, family, friends, school and community). Two rounds of psychometric revision and community consultations created a CRQ-P/C comprised of 43 items in 11 scales: self (positive self, positive future, managing emotions), family (connectedness, guidance, basic needs), school (teacher support, engagement, friends) and culture (connectedness, language). Excellent scale reliability ( $\alpha=0.7-0.9$ ), except *basic needs* scale ( $\alpha=0.61$ ) (where a highly endorsed item was retained for conceptual integrity). Criterion validity was supported: scales had low to moderate negative correlations with SDQ total difficulties score ( $R_s=-0.2/-0.5$ ,  $p<0.001$ ); children with emotion/behavioural difficulties had lower CRQ-P/C scores ( $\beta=-14.5$ , 95%CI -17.5 to -11.6, adjusted for gender).

**Conclusion** The CRQ-P/C is a culturally and socially inclusive, multi-domain measure of factors supporting child resilience. It has good psychometric properties and will have broad applications in clinical, educational and research settings. The tool adds to the few culturally competent measure available to Aboriginal and refugee background communities.

**Strengths and Limitations of this study: (Up to 5 short bullet points)**

- Use of participatory methods and co-design processes to ensure content validity and a measure that is culturally and socially inclusive of diverse populations.
- Use of gold standard psychometric approaches, including confirmatory factor analysis to establish construct validity, and testing of criterion validity against the Strengths and Difficulties Questionnaire.
- While the families taking part represent a cross section of the Australian community, the measure may not work as well in other settings or communities not represented in our study.
- While we were able to assess criterion validity, the Strengths and Difficulties Questionnaire is not a gold standard measure of resilience as no such measure was available at the time of the study.

1  
2  
3 Children exposed to social adversity and trauma have higher risks of adverse behavioural, emotional,  
4 developmental, and physical health problems.(1-3) However, many children experiencing adversity  
5 have outcomes similar to peers who have not experienced the same level or type of adversity.  
6  
7 Understanding what enables children to do well despite exposure to social adversity has been  
8 hampered by a lack of culturally and psychometrically validated measures.(4, 5)  
9  
10

11  
12 Much resilience research has focused on identifying individuals or populations exposed to a specific  
13 adversity and using a measure of competence (e.g. academic or social) to identify individuals  
14 showing positive outcomes (6). These individuals are categorised as 'resilient'. Thus resilience is  
15 conceptualised as an 'outcome'. However, a growing number of studies look at resilience as the  
16 process by which positive or protective factors mediate a child's mental, academic, or social  
17 outcomes. (7-10) In an ecological-transactional model of resilience each level of the environment -  
18 the child surrounded by their family, community and societal factors - contains risk and protective  
19 factors.(11, 12) Resilience can be seen as the process of drawing on available internal resources or  
20 the environment to develop, maintain or recover developmental or health outcomes despite  
21 adversity.(13-15). As a lifelong process, resilience needs to be considered within the context of life  
22 course development, and across these socio-ecological domains.  
23  
24  
25  
26  
27  
28  
29

30  
31 Some communities, including First Nations and refugee communities, experience a significantly  
32 higher cumulative load of early life stress and adversity. This can be linked to the impacts of  
33 colonisation, persecution, experiences of war, social disadvantage and intergenerational trauma.  
34 Despite these experiences, many of these communities demonstrate resilience, (16-19) but are  
35 poorly represented in the existing child resilience literature - as demonstrated in a systematic review  
36 conducted as part of this study.(20) The few resilience measures currently available are almost  
37 universally adult or youth focused and developed without adequate consideration of cultural  
38 diversity. (21-24)  
39  
40  
41  
42  
43  
44

45 Middle childhood represents a neglected period in research and clinical work.(25) A number of  
46 disorders and psychopathologies such as depression, self-injury, substance use, and eating disorders  
47 commonly emerge in adolescence (26), but increasingly antecedents are being identified in  
48 childhood.(27, 28) Sandwiched between early childhood and adolescence, middle childhood  
49 represents a critical 'turning point' or transition, where appropriate intervention may significantly  
50 change a life course.(25, 29) Better evidence about factors supporting resilience in children  
51 experiencing adversity is essential to inform effective interventions  
52  
53  
54  
55  
56

57 A review of resilience measures conducted in 2011 stressed the lack of measures for children under  
58 12 years.(22). A more recent review identified few studies employing a psychometrically validated  
59  
60

1  
2  
3 measure of resilience. Of those using validated measures, the most commonly used were the  
4 Strengths and Difficulties Questionnaire (n=6) and the Child Behaviour Checklist (n=5), neither of  
5 which was designed to assess resilience. A systematic review of resilience factors associated with  
6 positive outcomes for adolescents in out-of-home care identified a greater number of resilience  
7 measures. The one study conducted with children ( $\leq 12$  years) used the *Strengths Scale of the Child*  
8 *and Adolescent Needs and Strengths* measure to identify resilience factors. Seven of the remaining  
9 16 studies included a standardised measure of resilience factors. Four measures were cited:  
10 Resilience Scale for Children and Adolescents (individual resilience factors only), the Child and Youth  
11 Resilience Measure (a multidomain brief measure developed and tested with adolescents and  
12 adults); the Adolescent Resilience Questionnaire (a multidomain adolescent measure), and the  
13 Resilience Scale (a multidomain adult measure). Finally, a measure developed to assess the social  
14 and emotional wellbeing of indigenous youth - Strong Souls – includes a resilience scale that  
15 addresses individual and social aspects of resilience.(30) None of these measures were developed  
16 with children, specifically children aged 5-12 years, nor do the measures address all domains in  
17 which resilience factors (and vulnerabilities) will exist. Greater scientific rigour and consistency in  
18 measurement tools is needed, particularly for children, including the development and validation of  
19 culturally and socially inclusive tools (22, 23, 31-33).

20  
21  
22 This paper describes the development of the Child Resilience Questionnaire (CRQ), a culturally and  
23 socially inclusive multidimensional measure of factors supporting resilient child outcomes.  
24 Community based participatory research methods and co-design with Aboriginal and refugee-  
25 background communities (34, 35) were employed to create a measure with high cultural  
26 acceptability, reliability, and effectiveness for use in a range of diverse contexts. A parent/caregiver,  
27 child and teacher report were developed. The objectives of this paper are to describe: 1)  
28 development of the CRQ conceptual scales and items; 2) initial pilot testing of the parent/carer  
29 version (CRQ-P/C ) assessing the overall structure and performance of individual items and scales;  
30 and 3) results of psychometric testing of the revised CRQ-P/C, including assessment of construct  
31 validity, criterion validity with the Strengths and Difficulties Questionnaire, and internal  
32 consistency/reliability.

## 33 34 35 36 37 38 39 40 41 42 43 44 45 46 47 48 49 50 51 52 53 54 55 56 57 58 59 60

### Method

The study was designed to develop an inclusive, multidimensional measure of resilience in children that was relevant to a range of contexts in which children may encounter adversity and show resilience. Two methodological approaches were used to ensure participation by families with diverse social and cultural backgrounds, adversity exposures and resilience factors. 1) the questionnaire was co-designed with Aboriginal and refugee background communities; and 2)



1  
2  
3 families were recruited from outpatient clinics in a large public tertiary hospital. Public hospitals  
4 provide free healthcare and the clinics are attended by large numbers of families every day,  
5 including urban and rural based families, with significant variation in economic, cultural and social  
6 backgrounds.  
7  
8  
9

10 Throughout every stage of the study, the following processes were used to embed community  
11 consultation, engagement and co-design. The study was conducted in partnership with the  
12 Aboriginal Health Council of South Australia, an Aboriginal family support unit at the hospital, and  
13 the lead provider of refugee counselling services in Victoria. These partners were involved in the  
14 funding application and study design as recommended in community consultation guidelines.(36-38)  
15 Working groups involving academic and non-academic (partner) study investigators were  
16 established to co-design research processes. The Aboriginal working group involved Aboriginal  
17 researchers, Aboriginal and non-Aboriginal study investigators, and representatives of partner  
18 organisations. The refugee working group involved study investigators, representatives of partner  
19 organisations, staff from the hospital's Immigrant Health Centre, refugee advocates and bicultural  
20 researchers employed on the study. Aboriginal researchers or bicultural workers were employed to  
21 work with their communities and networks to advertise the study and recruit families. As a member  
22 of the community, they ensured that the recruitment, consent and questionnaire administration  
23 were conducted in ways that promoted cultural safety and trust, including speaking to families in  
24 their preferred language.  
25  
26  
27  
28  
29  
30  
31  
32  
33  
34  
35

36 The three stages in the development of the CRQ-P/C will be discussed in turn: 1) generation of  
37 potential items and development of conceptual subscales; 2) pilot testing of draft items; and 3)  
38 refinement and validation of final CRQ-P/C.  
39  
40  
41  
42

#### 43 1) Development of conceptual scales and items

44  
45 The draft CRQ was developed based on an ecological-transactional model of resilience, with input  
46 sought from diverse population groups to ensure variation in the type and severity of adversity  
47 experienced and the individual, family, and community level resilience factors that would be  
48 identified. The recruitment and conduct of discussion groups have been described elsewhere (39). In  
49 brief, resilience factors were identified in a systematic review of existing literature (20) and in  
50 discussion groups with people working with higher risk families, and parents and children of diverse  
51 backgrounds. These factors were grouped by the first author into socio ecological domains  
52 (individual, family, friends, school, and community). Conceptual scales and items were co-designed  
53 and three versions were created; a parent/caregiver version (CRQ-P/C) for children aged 5-12 years;  
54 a self-report version for children aged 7-12 years (CRQ-C); and a school staff version for children  
55  
56  
57  
58  
59  
60

1  
2  
3 aged 5-12 years (CRQ-S). All development processes involved iterative consultation and community  
4 engagement as described above. While space limits this paper to describing the CRQ-P/C,  
5 publication of the CRQ-C and CRQ-S will follow.  
6  
7

#### 8 Pilot study to test draft CRQ-P/C

9  
10 Parents/caregivers of children aged 5-12 years from diverse backgrounds were recruited from four  
11 sources from June-December 2016.  
12  
13

- 14 1) Aboriginal families were recruited via the community networks of Aboriginal investigators and  
15 researchers based in South Australia. Parents/caregivers of Aboriginal children were invited to  
16 complete the draft CRQ-P/C on paper.  
17
- 18 2) The draft CRQ-P/C was included in a pilot follow-up questionnaire completed by mothers/carers  
19 of Aboriginal children aged 5-7 years in the Aboriginal Families Study, a community-based birth  
20 cohort of 344 Aboriginal families recruited in South Australia  
21
- 22 3) Families of refugee-background were recruited via community networks of bicultural researchers  
23 in four diverse communities: Assyrian Chaldean (from Iraq and Syria), Karen (from Burma); Tamil  
24 (from Sri Lanka) and Sierra Leone families (from Sierra Leone). Families completed the CRQ-P/C  
25 on paper in English, Karen, Arabic with assistance from the bicultural researcher as needed.  
26
- 27 4) Representing the 'general' population, urban and rural families from diverse economic, cultural  
28 and social backgrounds were recruited in specialist outpatient clinics at a large tertiary children's  
29 hospital. Families in the waiting areas were invited to complete the CRQ-P/C on paper while  
30 waiting for their child's appointment.  
31  
32

#### 33 Validation study

34  
35 As above, parents/caregivers of children aged 5-12 years from diverse backgrounds were recruited  
36 between September 2017 - March 2020:  
37  
38

- 39 1) Aboriginal families were recruited via community networks of Aboriginal investigators and  
40 researchers and completed the CRQ-P/C on iPad or paper. The CRQ-P/C was completed by  
41 mothers/caregivers of study children participating in the Aboriginal Families Study.  
42
- 43 2) Refugee-background families were recruited via the community networks of the bicultural  
44 workers in four diverse communities: Assyrian Chaldean (from Iraq and Syria), Hazara (from  
45 Afghanistan), Karen (from Burma and Thailand); Sierra Leone families (from Sierra Leone)..  
46 Parents/carers completed the CRQ-P/C on iPad or paper in English, Karen, Arabic or Dari as  
47 preferred.  
48  
49  
50  
51  
52  
53  
54  
55  
56  
57  
58  
59  
60

- 1  
2  
3 3) Representing the 'general' population, urban and rural based families with diverse economic,  
4 cultural and social backgrounds were recruited in the specialist clinics of a tertiary children's  
5 hospital. Parents/carers were randomised to complete the CRQ-P/C on iPad or paper.  
6  
7  
8  
9 4) A population sample of families were recruited via a pregnancy cohort study of 1507 first time  
10 mothers, followed up over 10 years (Maternal Health Study). Child exposure to intimate partner  
11 violence has been investigated in this cohort. Mothers were invited to complete the CRQ-P/C  
12 using an online REDCap database.  
13  
14  
15

## 16 **Measures**

### 17 Child Resilience Questionnaire

18 The CRQ-P/C comprises multiple scales across the individual, family, school and community domains.  
19 Figure 1 provides an outline of the domains, subscales and example items in the draft CRQ-P/C, pilot  
20 and final CRQ-P/C. The conceptually developed draft CRQ-P/C was over inclusive for testing  
21 purposes, with 169 items in 19 subscales.  
22  
23  
24  
25

26 Parents/carers were asked "How often are the following true for your child?", with response options  
27 0 "Not at all, 1 "Not often", 2 "Sometimes", 3 "Most of the time" 4 "All of the time". To support  
28 respondents with limited literacy and/or familiarity with research questions, response options were  
29 accompanied by a pictogram of a glass that was empty ('Not at all') through to a full glass ("All of the  
30 time"). The CRQ-P/C was available in English, Arabic, Karen, and Dari. Translations were conducted  
31 by accredited translators. The translated versions were assessed by study bicultural workers and  
32 revised to ensure words and language style were appropriate for the local community involved.  
33  
34  
35  
36  
37  
38

### 39 Strengths and Difficulties Questionnaire (SDQ)

40 As the most common measure of child resilience at the time of the study, the SDQ was included to  
41 test criterion validity. The measure comprises 25 statements on a 3-point scale (0=Not True to  
42 2=Certainly True) assessing emotional and behavioural difficulties. Six subscales assess emotional  
43 symptoms, conduct problems, hyperactivity and inattention, peer problems, and prosocial  
44 behaviours. The Total Difficulties score is calculated based on the first five subscales, with higher  
45 scores indicating more difficulties. A pre-defined cut-off score of  $\geq 14$  was used to classify children  
46 scoring in the clinical range based on Australian norms.(40, 41)  
47  
48  
49  
50  
51  
52

## 53 **Analysis**

54 Analyses of data collected in the pilot study and validation study was conducted iteratively.  
55 Descriptive statistics were used to summarise characteristics of the children (subject) and the  
56 parents/carers (respondent) completing the questionnaire.  
57  
58  
59  
60

### Pilot study

The distribution of item responses and missing data were examined. Items were removed if they had limited response sets, were highly skewed, or had a high proportion of missing data. Exploratory factor analyses (EFA) using maximum likelihood and varimax rotation in SPSS was then used to examine the factor structure within each domain.(42) Determination of the number of factors and items to retain was guided: by eigenvalues>1 (Kaiser's rule), scree plot, variance explained by the model, pattern of factor loadings, interpretability of the scale, and the conceptual underpinning of the scales.(43, 44)

### Validation study

The revised CRQ-P/C was employed in the validation study. Confirmatory Factor Analyses (CFA) were conducted using MPlus with robust maximum likelihood estimation on the covariance structures on the scales within each domain. The adequacy of the models was assessed using goodness-of-fit Chi Square ( $\chi^2$ ), and practical fit indices including the Comparative Fit Index, Goodness-of-Fit index (GFI) and Adjusted Goodness-of-Fit index (AGFI) with estimates of 0.90 or above indicating acceptable model fit.(45) The Root Mean Square Error of Approximation (RMSEA) with values close to or below 0.05 within the 90% confidence interval also indicated good model fit.(44) Standardised factor loadings, standardised residual covariances and modification indices were examined to identify model misfit. All modifications were theoretically driven based on the relevance of items to the scale and degree of redundancy.(42-44)

Internal scale consistency was examined using Cronbach Alpha, with 0.7-0.9 deemed good to excellent.(46, 47). Finally, criterion validity of the CRQ-P/C was assessed by examining the Pearson's rank correlation between CRQ scale scores and SDQ total score.(42, 43, 47).

## **Results**

### Participants

The recruitment sources and social characteristics of the children (subject) and their parents/carers (respondents) are outlined in Table 1 for the pilot and validation studies. The majority of children were Australian born, with a mean age of 9.7 (SD 1.6) in the pilot and 9.1 (SD 2.3) in the validation study, with slightly more boys than girls (52.8% compared to 47.2% in the validation sample). Targeted recruitment in the pilot and validation studies was successful in engaging a significant proportion of Aboriginal and/or Torres Strait Islander families (13.7 and 22.3 respectively) and refugee-background families (17.6 and 10.0% respectively).

### Pilot Study - Testing of items and CRQ-P/C structure

1  
2  
3 The conceptually developed draft CRQ-P/C comprised 19 scales and 169 items. Examination of item  
4 distributions, missing values and participant feedback guided the exclusion of 74 items (self-domain–  
5 15; school-17, family-41; community-1). A very brief description of the factor analyses is provided  
6 below, with comprehensive details prioritised for the validation study. (Factor solutions, item  
7 loadings and a record of decisions are detailed in Supplementary Table 1).  
8  
9

10  
11  
12 Self: A seven-factor solution was identified explaining 54.8% of the variance in scores. A four-factor  
13 solution was retained based on criteria described above. The factors reflected *Positive self*, *Positive*  
14 *Future*, *Managing emotions/problems (positive)* and *Managing emotions (negative)* (see Figure 1). A  
15 number of items were removed due to low communalities or low/multiple factor loadings. Given the  
16 conceptual overlap, the three-item factor *Managing emotions (negative)* was dropped and a three-  
17 factor solution was accepted for validation.  
18  
19

20  
21  
22 Family: A six-factor solution was identified explaining 54.5% of the variance in scores. Four of the six  
23 conceptually developed scales were accepted for validation *Connectedness*, *Guidance*, *Basic needs*  
24 and *Friends*. Three items were dropped for loading on multiple factors. Two items in the  
25 *Connectedness* scale also loaded on the *Basic needs factor* (I listen to my child, I am close to my  
26 child). These items were retained as seen as conceptually important in consultations. The *Friends*  
27 scale had only two items loading at >0.4 and was revised for validation.  
28  
29

30  
31  
32 School: A six-factor solution was identified explaining 59.1% of the variance in scores, with the first  
33 three factors retained reflecting *Belonging*, *Engagement*, *Teacher support* scales. One item identified  
34 as ambiguous/difficult to answer by respondents was deleted, and two items with low factor  
35 loadings were dropped.  
36  
37

38  
39  
40 Community: A six-factor structure was identified explaining 61.4% of the variance. Three scales were  
41 retained - *Connection to culture*, *Religion and Spirituality* and *Community* (see Figure 1). Five items  
42 were deleted due to low loadings and/or conceptual overlap. In consultations, it was agreed that  
43 *Connection to culture* and *Community* scales also overlapped conceptually. *Connection to culture* was  
44 retained as more congruent with the resilience literature, while *Community* appeared to be more  
45 related to what could be considered socio-economic factors (e.g. having green spaces, feeling safe in  
46 your community). Other changes made in this domain are described below.  
47  
48

49  
50  
51 Consultation driven revisions: Working group, community and investigator consultations on the face  
52 and content validity of the revised CRQ resulted in three further alterations:  
53  
54

55  
56 1) The community/culture domain was developed to capture resilience factors that were broadly  
57 relevant - not limited to overseas born or Aboriginal families. However many respondents indicated  
58 they 'didn't have a culture' and skipped the section (mean missing data was 7.0 (SD=11.4) compared  
59  
60

1  
2  
3 to 3.9 (SD=10.1) in self-domain or 5.1 (SD=11.6) in the school domain). A preamble was added asking  
4 respondents to tick a list of factors important to their family that reflected a diverse interpretation  
5 of culture (e.g. the food you eat, family celebrations, family traditions, religion). It was hoped this  
6 would highlight the broad relevance of the section and encourage completion.  
7  
8

9  
10 2) Language as a connection to culture was identified as a gap in the revised CRQ in consultations.  
11 Therefore, two new language scales (*Opportunity to learn, Connectedness*) were created for  
12 multilingual families through iterative consultations (See Figure 1).  
13  
14

15  
16 3) Peer relationships are known to be associated with resilience, (20) but the two scales addressing  
17 them (*Friends and School Belonging*) did not form strong scales. These scales were revised and  
18 expanded through an iterative process of consultation and included in the school domain (See Figure  
19 1).  
20  
21

### 22 Validation study

23  
24 The revised CRQ-P/C comprised 81 items in 15 subscales (see Figure 1). Scale items, item  
25 descriptives (mean, standard deviation, skewness and kurtosis), initial and final confirmatory factor  
26 model fit and loadings are provided in Table 2 (self and family domains) and Table 3 (school and  
27 community domains). Actions taken to improve model fit in confirmatory factor analyses (CFA) are  
28 described below.  
29  
30  
31  
32

33  
34 Self: The CFA for *Positive Future* was a good fit to the data, and all four items retained. The one  
35 factor congeneric *Self-Identity* model did not have good fit. This improved with removal of item 1  
36 (poor response distribution). The CFA for *Managing Emotions* showed poor fit to the data.  
37

38  
39 Sequential removal of three items with lowest factor loadings and/or conceptual overlap with other  
40 items resulted in a three-item subscale. The factor loadings for the remaining items were excellent  
41 (model fit indices not available for three item models).  
42  
43

44  
45 Family: The one factor congeneric model for *Connectedness* was a poor fit to the data. There was  
46 also redundancy between items. Item 2 was dropped as it had the lowest factor loading. Model fit  
47 was improved and the remaining items had excellent factor loadings. In the *Basic Needs* scale, the  
48 item "My child feels safe at our home" was retained for conceptual integrity despite being endorsed  
49 by most respondents (poor distribution). Item 1 and 3 were very highly endorsed and overlapped  
50 conceptually with other items. Dropping these two items resulted in good model fit. Finally, the one  
51 factor congeneric model *Guidance* showed poor model fit indices. Item 3 was removed due to the  
52 low factor loading and potential variation and ambiguity in wording around what is right and wrong  
53 across families. The factor loadings for the remaining items were excellent.  
54  
55  
56  
57  
58  
59  
60

1  
2  
3 School: The one factor congeneric models for *Teacher support* and *Engagement* had inadequate fit  
4 indices, and the items with the lowest factor loadings were dropped sequentially to achieve good fit  
5 indices. The one factor congeneric models for the *Belonging and Friends* scales did not fit the data.  
6  
7 Three and four factor CFA models were tested for this domain. The *Teacher support* and *School*  
8 *engagement* factors were consistent in both models, but the *Belonging and Friends* items were  
9 mixed. With compatibility between the two concepts, the decision was made to test a one factor  
10 congeneric model with the *Belonging and Friends* items combined, retaining items that loaded on  
11 the 3-factor model. Eight items were retained but the model had very poor fit to the data.  
12  
13 Sequential removal of the worst performing seven items did not achieve good model fit, however  
14 the factor loadings for the remaining three items from the *Friends* scale were excellent ( $\geq 0.75$ ) and  
15 this scale was retained.

16  
17 Culture: The added preamble to the culture section appeared to work well, with fewer missing  
18 items (mean = 1.3, SD = 3.7). One item in the *connectedness* scale was identified in community  
19 consultations as having poor face validity and was dropped (Our family culture makes my child feel  
20 special). The one factor congeneric *Connectedness* scale model showed poor model fit. Two items  
21 with the lowest factor loadings were removed. There was also redundancy between items 3 and 4.  
22 Item 3 was retained as it was more concisely worded. Good model fit was achieved.

23  
24 The items in the *Spirituality* scale had the highest level of missing data ( $\approx 10\%$ ). One item with poor  
25 distribution was dropped. The one factor congeneric model of the remaining items showed very  
26 poor fit. Sequentially dropping three items with the lowest loadings or conceptual overlap was  
27 insufficient to achieve acceptable model fit. The three-item factor had poor face validity and was  
28 dropped.

29  
30 An EFA was conducted to assess the underlying factor structure for the two new language scales.  
31 Scree plot and eigenvalues supported a one factor structure, explaining 21% of the variance,  
32 comprising six of the eight *Connectedness* scale items. A one factor congeneric model of the six  
33 items showed poor model fit. Dropping item 3 (lowest factor loading), followed by item 5  
34 (overlapped conceptually with item 6) resulted in good model fit indices and excellent item factor  
35 loadings.

### 36 The final CRQ-P/C

37  
38 The scale summary statistics and scale reliability are shown in Table 4. With the exception of the  
39 *Basic Needs* scale in the family domain (Cronbach's  $\alpha = 0.61$ ), the final scales showed excellent  
40 internal consistency (Cronbach's  $\alpha = 0.73$  to  $0.88$ ), with high internal consistency for the  
41 questionnaire as a whole (Cronbach's  $\alpha = 0.93$ ).  
42  
43  
44  
45  
46  
47  
48  
49  
50  
51  
52  
53  
54  
55  
56  
57  
58  
59  
60

1  
2  
3 Spearman's rank correlations between the CRQ-P/C scales are presented in Table 5. Generally,  
4 correlations between the subscales were moderate and in the expected direction. Scales within the  
5 same domain tended to be more highly correlated with each other than with scales in other  
6 domains. A strong correlation was observed between the *Positive Self* and *Positive Future* scales  
7 ( $r_s=0.66$ ,  $p<0.001$ ). As could be expected, the *Culture Language* subscale showed the lowest  
8 correlations with other scales, the highest correlation with the *Culture Connectedness* scale ( $r_s=0.23$ ,  
9  $p<0.001$ ), and was negatively correlated with the *Family Basic Needs* scale.

10  
11 Parents/caregivers rated girls higher on average than boys on five subscales: *Positive self*, *Managing*  
12 *Emotions*, *Family Connectedness*, *School Engagement* and *Friends* (see Table 4). Overall, the CRQ-P/C  
13 mean total score (excluding the *Culture - Language* scale) for boys was lower than for girls ( $t_{839}=3.0$ ,  
14  $p=0.003$ ).

### 15 **Criterion Validity**

16  
17 Criterion validity of the CRQ-P/C was assessed using the Strengths and Difficulties Questionnaire  
18 (SDQ). All CRQ-P/C scales showed low to moderate negative correlations with the SDQ total  
19 difficulties score. As would be expected given the content of the SDQ, the *Emotion Regulation* and  
20 *Friends* scales were the most highly correlated ( $r_s=-0.53$  and  $r_s=-0.45$  respectively). The total CRQ-P/C  
21 score was moderately negatively correlated with the SDQ total difficulties score ( $r_s=-0.47$ ).

22  
23 Almost one in five children (18.4%) were identified as having clinically significant symptoms on the  
24 SDQ (total difficulties score  $\geq 14$ ). The mean CRQ-P/C total resilience score for children identified as  
25 having emotional and/or behavioral difficulties was lower than for children without difficulties  
26 (mean=103.4, SD=18.7 and 119.3, SD=15.5 respectively). Linear regression analysis identified  
27 children with difficulties scored lower on average on the CRQ-P/C by 14 points ( $\beta=-14.5$ , 95%CI -17.5  
28 to -11.6,  $p<0.001$ ), after adjusting for child gender.

### 29 **Discussion**

30  
31 Extensive community based participatory research methods ensured the Child Resilience  
32 Questionnaire has good content validity and addresses a broad range of factors that can support  
33 child resilience across diverse contexts. The pilot testing and validation involved large samples, with  
34 targeted recruitment of families from diverse backgrounds, including families known to experience  
35 greater social disadvantage, adversity and resilience.(48, 49) The final CRQ-P/C comprises 10 scales  
36 across the domains of self, family, school and culture, with 43 items in total. Good psychometric  
37 properties were attained. Subscale internal consistency reliability was excellent apart from the  
38 family *Basic needs* scale, which was adequate. Construct validity was supported, with all scales  
39  
40  
41  
42  
43  
44  
45  
46  
47  
48  
49  
50  
51  
52  
53  
54  
55  
56  
57  
58  
59  
60



1  
2  
3 showing moderate negative correlation with the SDQ total difficulties score, and significantly lower  
4 mean resilience scores for children identified as having emotional and/or behavioral difficulties.

5  
6 Several aspects of the CRQ-P/C are important for note. Two scales in the Self-domain - *Positive self*  
7 and *Positive future* - were strongly correlated ( $r_s=0.66$ ). Further research is required to determine if  
8 it is sufficient to retain just one of these scales. 2) The family *Basic needs* scale showed only  
9 adequate internal consistency reliability (0.61), and almost a third of children (31%) were scored at  
10 the top of the scale range. Community consultations stressed that meeting basic family needs is a  
11 key factor underpinning child resilience. The scale addresses feeling safe at home, having routines,  
12 feeling special in your family, and having your own space in the place where you live. Despite very  
13 high positive endorsement, the item "I feel safe in my family" was retained for conceptual integrity.  
14 Children who are scored lower in this domain may be a particularly vulnerable group, with further  
15 research required to corroborate this. 3) The importance of cultural factors for resilient outcomes is  
16 not new.(19, 20, 50-52) What is new is the assessment of *connectedness* to culture and *language* as  
17 a connection to culture/community. Efforts were also made to assess potential strengths associated  
18 with a child's connection to religious and/or faith communities/institutions. Religion/spirituality was  
19 identified as potentially supporting child resilience in consultations, with mixed findings in the  
20 literature focused on adolescents or adults.(20) The spirituality/religion scale was unsuccessful. A  
21 high proportion of respondents skipped these items, or alternatively, responded with strong positive  
22 or negative endorsement of all items. It may be too disparate a factor to capture in a single scale, or  
23 a more distal factor for children than for adolescents or adults. Finally, the friends scale was not  
24 strongly consistent across the revisions but showed excellent scale reliability with three items. While  
25 friendships in middle childhood have been highlighted as developmentally important (25) and  
26 associated with positive self-worth and school engagement (53), most investigation in terms of  
27 resilience has been with adolescents.(54-56) Availability of the multidomain Child Resilience  
28 Questionnaire will facilitate investigation of the importance of specific resilience factors, such as  
29 friends, in different contexts (e.g. Aboriginal families) or adversities (e.g. family violence exposure) to  
30 advance our understanding of child resilience and how to support positive outcomes in the face of  
31 adversity.

32  
33 Strengths of our study include use of: participatory methods and co-design processes to ensure  
34 content validity and cultural acceptability; and gold standard psychometric approaches, including  
35 confirmatory factor analysis to establish construct validity; and testing of criterion validity against  
36 the SDQ.(23). In addition, we recruited culturally diverse participants and employed a range of  
37 approaches to community consultation and co-design to ensure cultural validity of the CRQ-P/C.  
38 While our study has many strengths compared to previous research, there are important limitations

1  
2  
3 to note. Our focus was children aged 5-12, and the measure may not be appropriate for use outside  
4 this age range. While the families taking part represent a cross-section of the Australian community,  
5 the measure may not work as well in other settings, or in communities not represented in our study,  
6 for example First Nation populations in other countries or refugee background communities not  
7 included in the development of the questionnaire. While we were able to assess criterion validity  
8 using the SDQ as a proxy measure of resilience, this is not a measure of resilience. No such measure  
9 existed at the time of the study. Further assessment against new resilience measures will enable  
10 more rigorous assessment. It was beyond the scope of this paper to report on the child report CRQ  
11 (CRQ-C) against the CRQ-P/C, but this is underway. Assessment of test-retest reliability and the  
12 psychometric properties of the CRQ-P/C in different populations, child ages and contexts are also  
13 planned.  
14  
15

## 16 Conclusion

17 Resilience was originally seen as a static characteristic of an individual – unique heroic figures  
18 achieving remarkable things despite tragic childhoods. It is now better conceptualized as a more  
19 ‘ordinary magic’.<sup>(13)</sup> A dynamic process of drawing on internal and external resources to adapt,  
20 recover or thrive despite adverse experiences. Thus children who have access to resilience factors  
21 within themselves, and in their family, school and community will fare better in the face of adversity,  
22 than children who are not similarly resourced. The CRQ-P/C is the first culturally and socially  
23 inclusive, multi-domain measure of child resilience that reflects this paradigm shift. The measure will  
24 facilitate investigation of a child’s strengths or vulnerabilities across different aspects of their socio-  
25 ecological world. Availability of the first developmentally appropriate child measure with  
26 demonstrated content, construct validity, reliability and criterion validity will facilitate  
27 understanding of resilience across settings, contexts, adversities, and countries.  
28  
29

30 Socially inclusive and culturally appropriate research methods and tools are fundamental to creating  
31 the evidence needed to guide interventions to support child resilience across diverse contexts and  
32 settings. This tool expands the extremely limited number of culturally inclusive measures available  
33 for use with Aboriginal and refugee background children.  
34  
35

36 The CRQ-C/P will support more complex and nuanced examinations of child resilience, with wide  
37 ranging applications including in: clinical settings for starting conversations with families about a  
38 child’s strengths and potential vulnerabilities; evaluation of programs aimed at building child  
39 resilience; and finally, in child resilience research.  
40  
41  
42  
43  
44  
45  
46  
47  
48  
49  
50  
51  
52  
53  
54  
55  
56  
57  
58  
59  
60

1  
2  
3 **Author contributions:** DG ER RG KG SJB conceptualized the study; DG ER RG KG DW MS SM SJB and  
4 the CRS collaborative group co-designed this study. DG, ER DW, SM, facilitated discussion groups and  
5 undertook data collection for the discussion groups, pilot study and/or validation study; DG, RG  
6 conducted the analyses for this paper; DG ER RG KG DW MS SM SJB and CRS collaborative group  
7 interpreted the data; DG drafted the paper. All authors critically revised the paper, approved the  
8 manuscript to be published and are accountable for the accuracy and integrity of the work.  
9  
10  
11  
12  
13

14 **Acknowledgements:** We would like to acknowledge all the families who participated and made this  
15 project possible, and the Aboriginal researchers (additional to the authors) and bicultural workers  
16 who developed study processes, collected data in their communities, and guided interpretation of  
17 findings throughout the study.  
18  
19  
20  
21

22 **Competing interests:** There are no competing interests for any author.  
23  
24

25 **Ethics Statement:** Ethics approval for all stages of the study was obtained from Royal Children's  
26 Hospital Human Research Ethics Committee (#34142, 34220,36142,37167A) and the South  
27 Australian Aboriginal Health Research Ethics Committee (04-14-585), and protocols were submitted  
28 for approval by study partner Victorian Foundation for the Survivors of Torture.  
29  
30  
31

32 **Funding:** This work was supported by the Australian National Health and Medical Research Council:  
33 Project Grants (#1064061, #1105561); Research Fellowship (SJB #1103976); Career Development  
34 Fellowship (RG #1109889); and the Safer Families CRE (DG #1198270); and the Myer Family  
35 Foundation (# N/A). Research conducted at the Murdoch Children's Research institute is supported  
36 by the Victorian Government's Operational Infrastructure program.  
37  
38  
39  
40  
41

42 **Data availability:** No additional data available  
43

44 **Public involvement:** This study grew from community consultations being conducted in Aboriginal  
45 communities in rural, regional and remote South Australia. Community members wanted to better  
46 understand why some children and families were doing well, while others in similar situations were  
47 not doing so well. Representatives from the public were consulted at each stage, for example, the  
48 study recruitment and conduct of the study were guided by an Aboriginal Advisory Group, an  
49 Aboriginal Working Group and a refugee background working group, each of which included  
50 community members. Community Aboriginal staff and bicultural workers were employed to guide  
51 and conduct the research and consult on the findings at each stage. Authors on this paper include  
52 representatives from all of these groups (with the exception of our bicultural workers).  
53  
54  
55  
56  
57  
58  
59  
60

## References

1. Kimber M, McTavish JR, Couturier J, Boven A, Gill S, Dimitropoulos G, et al. Consequences of child emotional abuse, emotional neglect and exposure to intimate partner violence for eating disorders: a systematic critical review. *BMC psychology*. 2017(1).
2. Hughes K, Bellis MA, Hardcastle KA, Sethi D, Butchart A, Mikton C, et al. The effect of multiple adverse childhood experiences on health: a systematic review and meta-analysis. *The Lancet Public Health*. 2017;2(8):e356-e66.
3. Kalmakis KA, Chandler GE. Health consequences of adverse childhood experiences: A systematic review. *Journal of the American Association of Nurse Practitioners*. 2015;27(8):457-65.
4. Khanlou N, Wray R. A Whole Community Approach toward Child and Youth Resilience Promotion: A Review of Resilience Literature. *International Journal of Mental Health and Addiction*. 2014;12(1):64-79.
5. Herrman H, Stewart D, Diaz-Granados N, Berger E, Jackson B, Yuen T. What is resilience? *Can J Psychiatry*. 2011;56(5):258-65.
6. Fraser E, Pakenham KI. Resilience in children of parents with mental illness: relations between mental health literacy, social connectedness and coping, and both adjustment and caregiving. *Psychol Health Med*. 2009;14(5):573-84.
7. Suárez-Soto E, Pereda N, Guilera G. Poly-victimization, resilience, and suicidality among adolescents in child and youth-serving systems. *Children and Youth Services Review*. 2019;106:104500.
8. Dirks MA, Persram R, Recchia HE, Howe N. Sibling relationships as sources of risk and resilience in the development and maintenance of internalizing and externalizing problems during childhood and adolescence. 2015. p. 145-55.
9. Domhardt M, Munzer A, Fegert JM, Goldbeck L. Resilience in Survivors of Child Sexual Abuse: A Systematic Review of the Literature. *Trauma, Violence & Abuse*. 2015;16(4):476-93.
10. Ben-David V, Jonson-Reid M. Resilience among adult survivors of childhood neglect: A missing piece in the resilience literature. *Children and Youth Services Review*. 2017;78:93-103.
11. Lynch M, Cicchetti D. An ecological-transactional analysis of children and contexts: The longitudinal interplay among child maltreatment, community violence and children's symptomatology. *Dev Psychopathol*. 1998;10:235-57.
12. Cicchetti D, Lynch M. Toward an ecological/transactional model of community violence and child maltreatment: consequences for children's development. *Psychiatry*. 1993;56(1):96-118.
13. Masten AS. Ordinary magic: Resilience processes in development. *American Psychologist*. 2001;56(3):227-38.
14. Cicchetti D. Annual Research Review: Resilient functioning in maltreated children – past, present, and future perspectives. *J Child Psychol Psychiatry*. 2013;54(4):402-22.
15. Rutter M. Annual Research Review: Resilience--clinical implications. *J Child Psychol Psychiatry*. 2013;54(4):474-87.
16. Pieloch KA, McCullough MB, Marks AK. Resilience of Children With Refugee Statuses: A Research Review. *Can Psychol*. 2016;57(4):330-9.
17. Tol WA, Song S, Jordans MJD. Resilience and mental health in children and adolescents living in areas of armed conflict - a systematic review of findings in low- and middle-income countries. *J Child Psychol Psychiatry*. 2013;54(4):445-60.

- 1
- 2
- 3 18. Merritt S. An Aboriginal Perspective on Resilience. *Aborig Isl Health Work J.* 2007;31(5):10.
- 4
- 5 19. Young C, Tong A, Nixon J, Fernando P, Kalucy D, Sherriff S, et al. Perspectives on childhood
- 6 resilience among the Aboriginal community: an interview study. *Aust N Z J Public Health.*
- 7 2017;41(4):405-10.
- 8
- 9 20. Gartland D, Riggs E, Muyeen S, Giallo R, Afifi TO, MacMillan H, et al. What factors are associated
- 10 with resilient outcomes in children exposed to social adversity? A systematic review. *BMJ Open.*
- 11 2019;9(4).
- 12
- 13 21. Gartland D. Resilience in adolescents: the development and preliminary psychometric testing of a
- 14 new measure. Melbourne: Swinburne University; 2009.
- 15
- 16 22. Windle G, Bennett KM, Noyes J. A methodological review of resilience measurement scales.
- 17 *Health Qual Life Outcomes.* 2011;9(1):8-25.
- 18
- 19 23. King L, Jolicoeur-Martineau A, Laplante DP, Szekely E, Levitan R, Wazana A. Measuring resilience
- 20 in children: a review of recent literature and recommendations for future research. *Current*
- 21 *Opinion in Psychiatry.* 2020.
- 22
- 23 24. Clauss-Ehlers CS. Sociocultural Factors, Resilience, and Coping: Support for a Culturally Sensitive
- 24 Measure of Resilience. *J Appl Dev Psychol.* 2008;29(3):197-212.
- 25
- 26 25. DelGiudice M. Middle Childhood: An Evolutionary-Developmental Synthesis. In: Halfon N, Forrest
- 27 CB, Lerner RM, Faustman EM, editors. *Handbook of Life Course Health Development.* Cham (CH):
- 28 Springer
- 29 Copyright 2018, The Author(s). 2018. p. 95-107.
- 30
- 31 26. Masten AS. Regulatory processes, risk, and resilience in adolescent development. *Annals New*
- 32 *York Academy of Sciences.* 2004;1021:310-9.
- 33
- 34 27. Centers for Disease Control and Prevention. Data and Statistics on Children's Mental Health US
- 35 Dept. Health and Human Services Mar 2021 [Available from:
- 36 <https://www.cdc.gov/childrensmentalhealth/data.html>].
- 37
- 38 28. Australian Institute of Health and Welfare. Australia's Children. Cat. No. CWS 69. In: Youth Ca,
- 39 editor. Canberra: AIHW2020.
- 40
- 41 29. Rutter M. Resilience concepts and findings: Implications for family therapy. *The Association for*
- 42 *Family Therapy and Systemic Practice.* 1999;21:119-44.
- 43
- 44 30. Thomas A, Cairney S, Gunthorpe W, Paradies Y, Sayers S. Strong Souls: development and
- 45 validation of a culturally appropriate tool for assessment of social and emotional well-being in
- 46 Indigenous youth. *Aust N Z J Psychiatry.* 2010;44(1):40-8.
- 47
- 48 31. Luthar S, Cicchetti D, Becker B. The construct of resilience: A critical evaluation and guidelines for
- 49 future work. *Child Dev.* 2000;71(3):543-62.
- 50
- 51 32. Liu D, Fairweather AK, Burns R, Roberts R. Measuring resilience: Difficulties, issues and
- 52 recommendations. *Australasian Society for Psychiatric Research (ASPR) Conference; Dec*
- 53 *Fremantle, Perth2012.*
- 54
- 55 33. Block K, Riggs E, Haslam N, editors. *Values and vulnerabilities : the ethics of research with*
- 56 *refugees and asylum seekers: Australian Academic Press; 2013.*
- 57
- 58 34. Tremblay M-C, Martin DH, Macaulay AC, Pluye P. Can we Build on Social Movement Theories to
- 59 Develop and Improve Community-Based Participatory Research? A Framework Synthesis Review.
- 60 *Am J Community Psychol.* 2017;59(3-4):333-62.

- 1
- 2
- 3
- 4 35. Lucero J, Wallerstein N, Duran B, Alegria M, Greene-Moton E, Israel B, et al. Development of a
- 5 Mixed Methods Investigation of Process and Outcomes of Community-Based Participatory
- 6 Research. *Journal of Mixed Methods Research*. 2018;12(1):55-74.
- 7
- 8 36. National Health And Medical Research Council. Increasing cultural competency for healthier living
- 9 & environments. 2005 25 Mar.
- 10
- 11 37. National Health and Medical Research Council. Ethical conduct in research with Aboriginal and
- 12 Torres Strait Islander Peoples and communities: Guidelines for researchers and stakeholders.
- 13 Commonwealth of Australia: Canberra; 2018.
- 14
- 15 38. Wardliparingga Aboriginal Research Unit. South Australian Aboriginal Health Research Accord.
- 16 South Australian Health and Medical Research Council; 2014.
- 17
- 18 39. Gartland D, Riggs E, Giallo R, Glover K, Casey S, Muyeen S, et al. Using Participatory Methods to
- 19 Engage Diverse Families in Research about Resilience in Middle Childhood. *Journal of Healthcare*
- 20 *for the Poor and Underserved*. 2021;Nov (in press).
- 21
- 22 40. Hawes DJ, Dadds MR. Australian data and psychometric properties of the Strengths and
- 23 Difficulties Questionnaire. *Australian & New Zealand Journal of Psychiatry*. 2004;38(8):644-51.
- 24
- 25 41. Hayes L. Problem behaviours in early primary school children: Australian normative data using
- 26 the Strengths and Difficulties Questionnaire. *Aust N Z J Psychiatry*. 2007;41(3):231-8.
- 27
- 28 42. Cohen R, Schneider W, Tobin R. *Psychological Testing and Assessment: An introduction to tests*
- 29 *and measurement*. Tenth ed: McGraw-Hill Education; 2021.
- 30
- 31 43. Boateng GO, Neilands TB, Frongillo EA, Melgar-Quiñonez HR, Young SL. Best Practices for
- 32 Developing and Validating Scales for Health, Social, and Behavioral Research: A Primer. *Frontiers*
- 33 *in Public Health*. 2018;6(149).
- 34
- 35 44. Shevlin M. Exploratory and confirmatory factor analysis in clinical and health psychology. In:
- 36 Miles J, Gilbert P, editors. *A handbook of research methods for clinical and health psychology*.
- 37 New York: Oxford University Press; 2005.
- 38
- 39 45. Hu L-t, Bentler PM. Cutoff criteria for fit indexes in covariance structure analysis: Conventional
- 40 criteria versus new alternatives. *Structural Equation Modeling*. 1999;6(1):1-55.
- 41
- 42 46. Kline T. *Psychological Testing: A Practical Approach to Design and Evaluation*. London: SAGE
- 43 Publications; 2005.
- 44
- 45 47. DeVon HA, Block ME, Moyle-Wright P, Ernst DM, Hayden SJ, Lazzara DJ, et al. A Psychometric
- 46 Toolbox for Testing Validity and Reliability. *J Nurs Scholarsh*. 2007;39(2):155-64.
- 47
- 48 48. Kaplan I. *Rebuilding Shattered Lives*. Victorian Foundation for Survivors of Torture. . Victorian
- 49 Foundation for the Survivors of Torture; 2020.
- 50
- 51 49. Herrman H. Sustainable Development Goals and the Mental Health of Resettled Refugee Women:
- 52 A Role for International Organizations. *Frontiers in psychiatry*. 2019;10:608.
- 53
- 54 50. Ungar M. Researching and theorizing resilience across cultures and contexts. *Prev Med*.
- 55 2012;55(5):387 - 9.
- 56
- 57 51. Panter-Brick C, Eggerman M. Understanding culture, resilience, and mental health: The
- 58 production of hope. In: Ungar M, editor. *The social ecology of resilience: A handbook of theory*
- 59 *and practice*. New York, NY, US: Springer Science + Business Media; 2012. p. 369-86.
- 60
52. Jones JM. Exposure to chronic community violence: resilience in African American children. *J*
- Black Psychol*. 2007;33(2):125-49.

- 1  
2  
3 53. Maunder R, Monks CP. Friendships in middle childhood: Links to peer and school identification,  
4 and general self-worth. *Br J Dev Psychol*. 2019;37(2):211-29.  
5  
6 54. Pawlby S, Mills A, Taylor A, Quinton D. Adolescent friendships mediating childhood adversity and  
7 adult outcome. *J Adolesc*. 1997;20:633-44.  
8  
9 55. Lansford JE, Criss MM, Pettit GS, Dodge KA, Bates JE. Friendship Quality, Peer Group Affiliation,  
10 and Peer Antisocial Behavior as Moderators of the Link Between Negative Parenting and  
11 Adolescent Externalizing Behavior. *Journal of Research on Adolescence* (Blackwell Publishing  
12 Limited). 2003;13(2):161.  
13  
14 56. Haddow S, Taylor EP, Schwannauer M. Positive peer relationships, coping and resilience in young  
15 people in alternative care: A systematic review. *Children and Youth Services Review*.  
16 2021;122:105861.  
17  
18  
19  
20  
21  
22  
23  
24  
25  
26  
27  
28  
29  
30  
31  
32  
33  
34  
35  
36  
37  
38  
39  
40  
41  
42  
43  
44  
45  
46  
47  
48  
49  
50  
51  
52  
53  
54  
55  
56  
57  
58  
59  
60

Table 1 Description of recruitment and participants

|                                                  | Pilot Study      | Validation study  |
|--------------------------------------------------|------------------|-------------------|
|                                                  | n (%)            | n (%)             |
| <b>Respondents</b>                               |                  |                   |
| Recruitment source                               |                  |                   |
| Hospital Specialist Clinics                      | 339 (69.3)       | 499 (44.8)        |
| Refugee background communities                   | 86 (17.6)        | 111 (10.0)        |
| Aboriginal communities                           | 18 (3.7)         | 71 (6.4)          |
| Aboriginal Mother-Child cohort                   | 46 (9.4)         | 165 (14.8)        |
| General population Mother-Child cohort           |                  | 268 (24.1)        |
| Questionnaire format                             |                  |                   |
| Paper                                            | 489 (100)        | 271 (24.3)        |
| iPad                                             |                  | 588 (52.8)        |
| Online (REDCap)                                  |                  | 255 (22.9)        |
| Self-reported gender                             |                  |                   |
| Female                                           | 391 (81.6)       | 938 (84.7)        |
| Male                                             | 88 (18.4)        | 170 (15.3)        |
| Continent of birth                               |                  |                   |
| Australia                                        | 330 (69.0)       | 807 (72.7)        |
| Asia                                             | 97 (20.3)        | 199 (17.9)        |
| Europe                                           | 22 (4.6)         | 54 (4.9)          |
| Africa                                           | 25 (5.2)         | 35 (3.2)          |
| North America                                    | 2 (0.4)          | 9 (0.8)           |
| South America                                    | 2 (0.4)          | 6 (0.5)           |
| <b>CRQ-P/C Target child</b>                      |                  |                   |
| Australian born                                  |                  |                   |
| Yes                                              | 244 (76.5)       | 988 (89.2)        |
| No                                               | 75 (23.5)        | 120 (10.8)        |
| Child gender                                     |                  |                   |
| Female                                           |                  | 439 (47.2)        |
| Male                                             |                  | 491 (52.8)        |
| Age <i>Mean (SD)</i>                             |                  |                   |
| 5-6 years                                        | 9.7 (1.6)        | 9.1 (2.3)         |
| 7-8 years                                        | 6 (1.8)          | 230 (20.8)        |
| 9-10 years                                       | 86 (25.2)        | 225 (20.3)        |
| 11-12 years                                      | 132 (38.7)       | 240 (21.7)        |
| 13 years                                         | 111 (32.6)       | 410 (37)          |
| 13 years                                         | 6 (1.8)          | 3 (0.3)           |
| Aboriginal &/or Torres Strait Islander           | 67 (13.7)        | 247 (22.3)        |
| Community (refugee background families)          |                  |                   |
| Assyrian Chaldean (Iraq, Syria)                  | 30 (34.9)        | 29 (26.1)         |
| Karen (Burma, Thailand)                          | 25 (29.1)        | 30 (27.0)         |
| Sierra Leone (Sierra Leone)                      | 16 (18.6)        | 22 (19.8)         |
| Tamil (Sri Lanka)                                | 15 (17.4)        | -                 |
| Hazara (Afghanistan)                             | -                | 30 (27.0)         |
| Years in Australia (refugee background families) |                  |                   |
| Born in Australia                                | 15 (25.0)        | 33 (31.1)         |
| 1-2 years                                        | 10 (16.7)        | 33 (31.1)         |
| 3-5 years                                        | 16 (26.7)        | 21 (19.8)         |
| 6+ years                                         | 19 (31.6)        | 19 (17.9)         |
| <b>Total</b>                                     | <b>489 (100)</b> | <b>1114 (100)</b> |



1  
2  
3  
4  
5  
6  
7  
8  
9  
10  
11  
12  
13  
14  
15  
16  
17  
18  
19  
20  
21  
22  
23  
24  
25  
26  
27  
28  
29  
30  
31  
32  
33  
34  
35  
36  
37  
38  
39  
40  
41  
42  
43  
44  
45  
46  
47  
48  
49  
50  
51  
52  
53  
54  
55  
56  
57  
58  
59  
60

Figure 1. CRQ-P/C scale progression from conceptual scales to final version.

CONFIDENTIAL  
For peer review only

Table 2. CRQ-P/C item summary, including standardised factor loadings from initial and final confirmatory factor models (CFA) for the SELF and FAMILY domains (n=1111).

| DOMAIN                            | Item                                         | N    | M (SD)    | Skew | Kurt | Model fit/ Factor loadings                |                                         |
|-----------------------------------|----------------------------------------------|------|-----------|------|------|-------------------------------------------|-----------------------------------------|
|                                   |                                              |      |           |      |      | Initial congeneric CFA                    | Final congeneric CFA                    |
| <b>SELF</b>                       |                                              |      |           |      |      |                                           |                                         |
|                                   |                                              |      |           |      |      | $\chi^2_{(14)}=124.20, p<.001; RMSEA=.09$ | $\chi^2_{(5)}=37.76, p<.001; RMSEA=.08$ |
|                                   |                                              |      |           |      |      | $(.07, .10); CFI=.98; TLI=.98$            | $(.10); CFI=.99; TLI=.99$               |
| <b>Self-Identity</b>              |                                              |      |           |      |      |                                           |                                         |
| 1                                 | My child feels good...                       | 1110 | 3.1 (0.6) | -0.4 | 3.5  | .75                                       | -                                       |
| 2                                 | My child keeps trying ...                    | 1107 | 2.8 (0.8) | -0.3 | 2.8  | .70                                       | .70                                     |
| 3                                 | My child is a strong...                      | 1105 | 3.1 (0.8) | -0.6 | 3.2  | .82                                       | .83                                     |
| 4                                 | My child is a confident ..                   | 1108 | 2.9 (0.8) | -0.5 | 3.0  | .85                                       | .81                                     |
| 5                                 | My child likes to try....                    | 1111 | 3.0 (0.9) | -0.6 | 2.6  | .69                                       | .70                                     |
| 6                                 | My child is a brave ...                      | 1107 | 3.1 (0.8) | -0.7 | 3.1  | .76                                       | .78                                     |
|                                   |                                              |      |           |      |      | $\chi^2_{(2)}=22.90, p<.001; RMSEA=.10$   | No modifications                        |
|                                   |                                              |      |           |      |      | $(.07, .14); CFI=.99; TLI=.99$            |                                         |
| <b>Positive future</b>            |                                              |      |           |      |      |                                           |                                         |
| 1                                 | My child is positive about ...               | 1109 | 3.2 (0.8) | -0.7 | 3.5  | .84                                       | .84                                     |
| 2                                 | My child looks forward to...                 | 1109 | 3.2 (0.8) | -0.9 | 3.5  | .70                                       | .70                                     |
| 3                                 | My child is hopeful ...                      | 1108 | 3.3 (0.7) | -1.0 | 4.2  | .95                                       | .95                                     |
| 4                                 | My child is positive ...                     | 1102 | 3.3 (0.7) | -0.8 | 3.5  | .95                                       | .95                                     |
|                                   |                                              |      |           |      |      | $\chi^2_{(9)}=184.67, p<.001; RMSEA=.14$  | No fit indices for 3-item model         |
|                                   |                                              |      |           |      |      | $(.12, .16); CFI=.99; TLI=.97$            |                                         |
| <b>Managing emotions/problems</b> |                                              |      |           |      |      |                                           |                                         |
| 1                                 | My child thinks about the reasons ...        | 1107 | 2.8 (0.9) | -0.4 | 2.9  | .33                                       | -                                       |
| 2                                 | My child knows how to manage ...             | 1109 | 2.4 (0.9) | -0.3 | 2.9  | .84                                       | -                                       |
| 3                                 | My child copes well ...                      | 1108 | 2.5 (0.9) | -0.5 | 3.3  | .83                                       | .77                                     |
| 4                                 | My child knows how to calm ...               | 1108 | 2.4 (1.0) | -0.3 | 2.8  | .82                                       | .83                                     |
| 5                                 | My child knows how to manage ...             | 1107 | 2.5 (0.9) | -0.3 | 3.1  | .91                                       | .94                                     |
| 6                                 | My child worries about ...                   | 1104 | 2.0 (1.0) | -0.1 | 3.0  | .04                                       | -                                       |
| <b>FAMILY</b>                     |                                              |      |           |      |      |                                           |                                         |
|                                   |                                              |      |           |      |      | $\chi^2_{(5)}= 167.22, p<.001; RMSEA=.18$ | $\chi^2_{(2)}= 3.30, p=.192; RMSEA=.03$ |
|                                   |                                              |      |           |      |      | $(.16, .20); CFI=.98 TLI=.97.$            | $(.00, .07); CFI=1.00; TLI=1.00$        |
| <b>Connectedness</b>              |                                              |      |           |      |      |                                           |                                         |
| 1                                 | My child talks to me about ...               | 1075 | 3.1 (0.8) | -0.7 | 3.5  | .83                                       | .84                                     |
| 2                                 | I listen to my child ...                     | 1069 | 3.6 (0.6) | -0.8 | 3.0  | .61                                       | -                                       |
| 3                                 | My child talks to me about their feelings .. | 1072 | 3.2 (0.8) | -0.9 | 3.8  | .93                                       | .93                                     |
| 4                                 | My child talks to me about their worries...  | 1068 | 3.1 (0.9) | -0.8 | 3.4  | .89                                       | .89                                     |
| 5                                 | I am close ...                               | 1071 | 3.7 (0.5) | -1.8 | 6.6  | .75                                       | .70                                     |
|                                   |                                              |      |           |      |      | $\chi^2_{(9)}= 42.50, p<.001; RMSEA=.06$  | $\chi^2_{(2)}= 4.00, p=.135; RMSEA=.03$ |
|                                   |                                              |      |           |      |      | $(.04, .08); CFI=.99; TLI=.98$            | $(.00, .08); CFI=1.00; TLI=.99$         |
| <b>Basic needs</b>                |                                              |      |           |      |      |                                           |                                         |
| 1                                 | My child likes being ...                     | 1073 | 3.5 (0.6) | -1.3 | 5.3  | .71                                       | -                                       |
| 2                                 | My child feels safe ...                      | 1070 | 3.8 (0.5) | -2.3 | 8.6  | .77                                       | .67                                     |
| 3                                 | My child feels they belong...                | 1070 | 3.7 (0.6) | -2.1 | 8.6  | .82                                       | -                                       |
| 4                                 | Our family has routines ...                  | 1068 | 3.4 (0.7) | -1.0 | 3.5  | .58                                       | .61                                     |

|                                                                       |                                        |      |           |      |     |     |                                 |
|-----------------------------------------------------------------------|----------------------------------------|------|-----------|------|-----|-----|---------------------------------|
| 5                                                                     | My child feels special ...             | 1069 | 3.4 (0.8) | -1.5 | 6.1 | .75 | .79                             |
| 6                                                                     | My child has own space...              | 1068 | 3.5 (0.8) | -2.1 | 7.4 | .58 | .60                             |
| $\chi^2_{(2)}=10.03, p<.001; RMSEA=.06 (.03, .10); CFI=1.00; TLI=.99$ |                                        |      |           |      |     |     | No fit indices for 3-item model |
| <b>Guidance</b>                                                       |                                        |      |           |      |     |     |                                 |
| 1                                                                     | My child is given responsibilities ... | 1073 | 2.8 (1.0) | -0.6 | 2.8 | .73 | .72                             |
| 2                                                                     | My child helps with things like ...    | 1068 | 2.8 (1.0) | -0.3 | 2.3 | .79 | .82                             |
| 3                                                                     | Our family talks about ...             | 1068 | 3.6 (0.6) | -1.5 | 5.1 | .51 | -                               |
| 4                                                                     | I teach my child life ...              | 1071 | 3.3 (0.8) | -1.0 | 3.4 | .75 | .73                             |

For peer review only

CONFIDENTIAL

1  
2  
3  
4  
5  
6  
7  
8  
9  
10  
11  
12  
13  
14  
15  
16  
17  
18  
19  
20  
21  
22  
23  
24  
25  
26  
27  
28  
29  
30  
31  
32  
33  
34  
35  
36  
37  
38  
39  
40  
41  
42  
43  
44  
45  
46

Table 3. CRQ-P/C item summary, including standardised factor loadings from initial and final confirmatory factor models (CFA) for the SCHOOL and COMMUNITY domains (n=1111).

| DOMAIN<br>Item                             | N    | M (SD)    | Skew | Kurt | Model fit/ Factor loadings                                              |                                                                      |
|--------------------------------------------|------|-----------|------|------|-------------------------------------------------------------------------|----------------------------------------------------------------------|
|                                            |      |           |      |      | Initial congeneric CFA                                                  | Final congeneric CFA                                                 |
| <b>SCHOOL</b>                              |      |           |      |      |                                                                         |                                                                      |
|                                            |      |           |      |      | $\chi^2_{(9)}=177.93, p<.001; RMSEA=.14 (.12, .15); CFI=.98; TLI=.97$   | $\chi^2_{(2)}=28.89, p<.001; RMSEA=.12 (.08,.15); CFI=1.00; TLI=.99$ |
| <b>Teachers</b>                            |      |           |      |      |                                                                         |                                                                      |
| 1 The teachers help ...                    | 1084 | 3.3 (0.8) | -0.9 | 3.5  | .79                                                                     | .80                                                                  |
| 2 The teachers listen to ....              | 1081 | 3.1 (0.8) | -0.8 | 3.3  | .84                                                                     | .88                                                                  |
| 3 My child's school/teachers celebrate ... | 1078 | 3.3 (0.8) | -1.1 | 4.0  | .74                                                                     | -                                                                    |
| 4 My child has a teacher they can ...      | 1075 | 3.0 (1.0) | -0.9 | 3.3  | .75                                                                     | .76                                                                  |
| 5 The teachers let my child know ...       | 1078 | 3.2 (0.8) | -0.8 | 3.4  | .81                                                                     | .75                                                                  |
| 6 The teachers are fair ...                | 1070 | 3.2 (0.8) | -1.0 | 4.5  | .70                                                                     | -                                                                    |
|                                            |      |           |      |      | $\chi^2_{(9)}=99.86, p<.001; RMSEA=.10 (.08, .12); CFI=.98; TLI=.97$    | $\chi^2_{(2)}=25.41, p<.001; RMSEA=.10 (.07, .15); CFI=.99; TLI=.98$ |
| <b>Engagement</b>                          |      |           |      |      |                                                                         |                                                                      |
| 1 My child likes learning ...              | 1095 | 3.2 (0.8) | -1.0 | 3.7  | .89                                                                     | .88                                                                  |
| 2 My child doesn't like ...                | 1082 | 3.2 (1.0) | -1.2 | 3.8  | .63                                                                     | -                                                                    |
| 3 My child is interested ...               | 1081 | 3.2 (0.8) | -0.9 | 3.4  | .88                                                                     | .88                                                                  |
| 4 Trying hard at school ...                | 1077 | 3.0 (1.0) | -0.8 | 3.2  | .68                                                                     | .71                                                                  |
| 5 My child finishes work ...               | 1061 | 2.8 (0.9) | -0.6 | 2.9  | .64                                                                     | .65                                                                  |
|                                            |      |           |      |      | $\chi^2_{(35)}=607.70, p<.001; RMSEA=.13 (.12, .14); CFI=.92; TLI=.90$  | No fit indices for 3-item model                                      |
| <b>Belonging PLUS Friend scale</b>         |      |           |      |      |                                                                         |                                                                      |
| 1 My child gets bullied ...                | 1083 | 3.0 (1.0) | -0.7 | 3.1  | .58                                                                     | -                                                                    |
| 3 My child feels comfortable ...           | 1073 | 3.2 (1.0) | -1.4 | 4.8  | -.39                                                                    | -                                                                    |
| 4 My child feels different ...             | 1075 | 3.0 (1.1) | -0.7 | 2.8  | .61                                                                     | -                                                                    |
| 5 My child gets in trouble ....            | 1081 | 3.2 (0.9) | -1.1 | 4.0  | .31                                                                     | -                                                                    |
| 6 My child is lonely ...                   | 1066 | 3.2 (0.9) | -1.2 | 3.9  | .80                                                                     | -                                                                    |
| 7 My child finds it hard ...               | 1090 | 2.9 (1.1) | -0.7 | 2.8  | .73                                                                     | -                                                                    |
| 8 My child would like to ...               | 1073 | 1.9 (1.2) | -0.0 | 2.1  | .48                                                                     | -                                                                    |
| 9 My child has a group of friends ...      | 1081 | 3.3 (0.8) | -1.1 | 4.4  | -.83                                                                    | .81                                                                  |
| 10 My child has a friend they can ...      | 1067 | 2.7 (1.1) | -0.6 | 2.8  | -.67                                                                    | .75                                                                  |
| 11 My child has a best ...                 | 1077 | 3.2 (1.0) | -1.3 | 4.3  | -.78                                                                    | .90                                                                  |
| <b>COMMUNITY</b>                           |      |           |      |      |                                                                         |                                                                      |
|                                            |      |           |      |      | $\chi^2_{(27)}= 568.07, p<.001; RMSEA=.14 (.13, .15); CFI=.96; TLI=.94$ | $\chi^2_{(2)}= 33.3, p<.001; RMSEA=.13 (.09,.17); CFI=.99; TLI=.98$  |
| <b>Culture</b>                             |      |           |      |      |                                                                         |                                                                      |
| 1 My child is strong because ...           | 1029 | 2.9 (0.9) | -0.9 | 3.9  | .78                                                                     | .83                                                                  |
| 2 My child is connected ...                | 1025 | 3.0 (0.9) | -0.9 | 3.7  | .80                                                                     | .81                                                                  |
| 3 My child can deal with problems ...      | 1026 | 2.8 (1.0) | -0.6 | 3.2  | .82                                                                     | -                                                                    |
| 4 Our family culture or values ...         | 1023 | 2.8 (0.9) | -0.6 | 3.2  | .85                                                                     | .81                                                                  |

|    |   |                                              |      |           |      |     |     |     |
|----|---|----------------------------------------------|------|-----------|------|-----|-----|-----|
| 1  | 5 | My child likes going to events ...           | 1011 | 3.1 (0.9) | -1.0 | 3.7 | .72 | -   |
| 2  | 6 | My child is connected to elders ...          | 1020 | 3.2 (1.1) | -1.3 | 3.9 | .63 | -   |
| 3  | 7 | My child is strong because of our family ... | 1016 | 2.9 (1.0) | -0.8 | 3.2 | .84 | .79 |
| 4  | 8 | Our family culture makes my ...              | 1003 | 2.9 (1.0) | -0.8 | 3.2 | -   | -   |
| 5  |   |                                              |      |           |      |     |     |     |
| 6  |   |                                              |      |           |      |     |     |     |
| 7  |   |                                              |      |           |      |     |     |     |
| 8  |   |                                              |      |           |      |     |     |     |
| 9  |   |                                              |      |           |      |     |     |     |
| 10 |   |                                              |      |           |      |     |     |     |
| 11 |   |                                              |      |           |      |     |     |     |
| 12 |   |                                              |      |           |      |     |     |     |
| 13 |   |                                              |      |           |      |     |     |     |
| 14 |   |                                              |      |           |      |     |     |     |
| 15 |   |                                              |      |           |      |     |     |     |
| 16 |   |                                              |      |           |      |     |     |     |
| 17 |   |                                              |      |           |      |     |     |     |
| 18 |   |                                              |      |           |      |     |     |     |
| 19 |   |                                              |      |           |      |     |     |     |
| 20 |   |                                              |      |           |      |     |     |     |
| 21 |   |                                              |      |           |      |     |     |     |
| 22 |   |                                              |      |           |      |     |     |     |
| 23 |   |                                              |      |           |      |     |     |     |
| 24 |   |                                              |      |           |      |     |     |     |
| 25 |   |                                              |      |           |      |     |     |     |
| 26 |   |                                              |      |           |      |     |     |     |
| 27 |   |                                              |      |           |      |     |     |     |
| 28 |   |                                              |      |           |      |     |     |     |
| 29 |   |                                              |      |           |      |     |     |     |
| 30 |   |                                              |      |           |      |     |     |     |
| 31 |   |                                              |      |           |      |     |     |     |
| 32 |   |                                              |      |           |      |     |     |     |
| 33 |   |                                              |      |           |      |     |     |     |
| 34 |   |                                              |      |           |      |     |     |     |
| 35 |   |                                              |      |           |      |     |     |     |
| 36 |   |                                              |      |           |      |     |     |     |
| 37 |   |                                              |      |           |      |     |     |     |
| 38 |   |                                              |      |           |      |     |     |     |
| 39 |   |                                              |      |           |      |     |     |     |
| 40 |   |                                              |      |           |      |     |     |     |
| 41 |   |                                              |      |           |      |     |     |     |
| 42 |   |                                              |      |           |      |     |     |     |
| 43 |   |                                              |      |           |      |     |     |     |
| 44 |   |                                              |      |           |      |     |     |     |
| 45 |   |                                              |      |           |      |     |     |     |
| 46 |   |                                              |      |           |      |     |     |     |

Table 4. Summary of the final scales for the Child Resilience Questionnaire – Parent/Caregiver version.

|                | Items (range <sup>1</sup> )               | CRQ-P/C total sample |       |           |                   | Girls<br>(n=421) | Boys<br>(n=471) | T-test       | P value |        |
|----------------|-------------------------------------------|----------------------|-------|-----------|-------------------|------------------|-----------------|--------------|---------|--------|
|                |                                           | n                    | Range | Mean (SD) | Cronbach $\alpha$ | Mean (SD)        | Mean (SD)       |              |         |        |
| <b>SELF</b>    |                                           |                      |       |           |                   |                  |                 |              |         |        |
|                | Positive self                             | 5 (0 - 20)           | 1,112 | 2 - 20    | 14.8 (3.3)        | 0.83             | 15.2 (3.2)      | 14.8 (3.3)   | 2.0     | 0.042  |
|                | Positive future                           | 4 (0 - 16)           | 1,111 | 0 - 16    | 12.8 (2.7)        | 0.87             | 13.0 (2.5)      | 12.8 (2.7)   | 1.1     | 0.256  |
|                | Managing emotions                         | 3 (0 - 12)           | 1,100 | 0 - 12    | 7.1 (2.4)         | 0.86             | 7.8 (2.3)       | 7.2 (2.4)    | 3.6     | <0.001 |
| <b>FAMILY</b>  |                                           |                      |       |           |                   |                  |                 |              |         |        |
|                | Connectedness                             | 4 (0 - 16)           | 1,071 | 3 - 16    | 13.0 (2.6)        | 0.85             | 13.3 (2.5)      | 12.9 (2.6)   | 2.0     | 0.046  |
|                | Basic Needs                               | 4 (0 - 16)           | 1,070 | 6 - 16    | 14.1 (2.0)        | 0.61             | 14.1 (2.0)      | 14.1 (2.0)   | -0.1    | 0.898  |
|                | Guidance                                  | 3 (0 - 12)           | 1,076 | 1 - 12    | 8.9 (2.3)         | 0.73             | 9.0 (2.3)       | 8.8 (2.3)    | 1.5     | 0.133  |
| <b>SCHOOL</b>  |                                           |                      |       |           |                   |                  |                 |              |         |        |
|                | Teacher Support                           | 4 (0 - 16)           | 1,080 | 0 - 16    | 12.6 (2.8)        | 0.81             | 12.7 (2.6)      | 12.7 (2.8)   | 0.2     | 0.811  |
|                | Engagement                                | 4 (0 - 16)           | 1,079 | 2 - 16    | 12.2 (2.8)        | 0.81             | 12.9 (2.5)      | 11.8 (3.0)   | 5.4     | <0.001 |
|                | Friends                                   | 3 (0 - 12)           | 1,049 | 0 - 12    | 9.2 (2.4)         | 0.80             | 9.5 (3.3)       | 9.0 (2.4)    | 3.2     | 0.002  |
| <b>CULTURE</b> |                                           |                      |       |           |                   |                  |                 |              |         |        |
|                | Connectedness                             | 5 (0 - 20)           | 1,023 | 0 - 16    | 11.6 (3.2)        | 0.84             | 11.8 (3.3)      | 11.6 (3.1)   | 0.8     | 0.433  |
|                | Language <sup>2</sup>                     | 4 (0 - 8)            | 489   | 0 - 8     | 4.9 (2.3)         | 0.88             | 5.2 (2.3)       | 4.9 (2.3)    | 0.9     | 0.347  |
|                | CRQ total score                           | 39 (0 - 156)         | 1,062 | 57 - 152  | 115.8 (17.4)      | 0.93             | 118.6 (16.7)    | 115.1 (17.6) | 3.0     | 0.003  |
|                | CRQ total score (incl. lang) <sup>2</sup> | 43 (0 - 172)         | 480   | 64 - 164  | 127.7 (18.4)      | 0.93             | 130.0 (17.6)    | 127.9 (18.4) | 1.2     | 0.249  |

<sup>1</sup> Response options ranged from 0 'Not at all' to 4 'All of the time', with exception of language where response options ranged from 0 'Not at all' to 2 'A lot'.

<sup>2</sup> Completed by multilingual families only.

Table 5. Spearman’s correlations between CRQ-P/C scales, total CRQ-P/C score and the Strengths and Difficulties Questionnaire (SDQ) total score.

| DOMAIN                                      | SELF                    |                           |                             | FAMILY                  |                       |                    | SCHOOL                    |                      |                   | CULTURE                 |                                | CRQ-P/C Total<br>n=1062 |
|---------------------------------------------|-------------------------|---------------------------|-----------------------------|-------------------------|-----------------------|--------------------|---------------------------|----------------------|-------------------|-------------------------|--------------------------------|-------------------------|
|                                             | Positive Self<br>n=1112 | Positive Future<br>n=1111 | Managing emotions<br>n=1100 | Connectedness<br>n=1071 | Basic Needs<br>n=1060 | Guidance<br>n=1063 | Teacher Support<br>n=1080 | Engagement<br>n=1079 | Friends<br>n=1079 | Connectedness<br>n=1023 | Language <sup>1</sup><br>n=489 |                         |
| CRQ-P/C Scale                               |                         |                           |                             |                         |                       |                    |                           |                      |                   |                         |                                |                         |
| <b>SELF</b>                                 |                         |                           |                             |                         |                       |                    |                           |                      |                   |                         |                                |                         |
| Positive Future                             | 0.661                   |                           |                             |                         |                       |                    |                           |                      |                   |                         |                                |                         |
| Emotion Regulation                          | 0.564                   | 0.547                     |                             |                         |                       |                    |                           |                      |                   |                         |                                |                         |
| <b>FAMILY</b>                               |                         |                           |                             |                         |                       |                    |                           |                      |                   |                         |                                |                         |
| Connectedness                               | 0.413                   | 0.443                     | 0.323                       |                         |                       |                    |                           |                      |                   |                         |                                |                         |
| Basic Needs                                 | 0.282                   | 0.383                     | 0.225                       | 0.499                   |                       |                    |                           |                      |                   |                         |                                |                         |
| Guidance                                    | 0.249                   | 0.273                     | 0.200                       | 0.449                   | 0.402                 |                    |                           |                      |                   |                         |                                |                         |
| <b>SCHOOL</b>                               |                         |                           |                             |                         |                       |                    |                           |                      |                   |                         |                                |                         |
| Teacher Support                             | 0.312                   | 0.319                     | 0.254                       | 0.349                   | 0.290                 | 0.241              |                           |                      |                   |                         |                                |                         |
| Engagement                                  | 0.456                   | 0.441                     | 0.427                       | 0.366                   | 0.314                 | 0.284              | 0.472                     |                      |                   |                         |                                |                         |
| Friends                                     | 0.373                   | 0.394                     | 0.403                       | 0.328                   | 0.282                 | 0.263              | 0.380                     | 0.377                |                   |                         |                                |                         |
| <b>CULTURE</b>                              |                         |                           |                             |                         |                       |                    |                           |                      |                   |                         |                                |                         |
| Connectedness                               | 0.378                   | 0.362                     | 0.318                       | 0.429                   | 0.406                 | 0.356              | 0.291                     | 0.304                | 0.289             |                         |                                |                         |
| Language (n=489)                            | 0.159                   | 0.100                     | 0.116                       | 0.120                   | -0.021 <sup>2</sup>   | 0.051 <sup>2</sup> | 0.072 <sup>2</sup>        | 0.192                | 0.001             | 0.233                   |                                |                         |
| <b>CRQ-P/C Total</b>                        | 0.713                   | 0.724                     | 0.637                       | 0.674                   | 0.569                 | 0.541              | 0.584                     | 0.682                | 0.634             | 0.634                   | 0.163                          |                         |
| <b>SDQ total difficulties score (n=980)</b> | -0.332                  | -0.324                    | -0.531                      | -0.213                  | -0.207                | -0.152             | -0.195                    | -0.394               | -0.449            | -0.217                  | -0.051 <sup>2</sup>            | -0.471                  |

<sup>1</sup> Completed by multilingual families only.

<sup>2</sup> Nonsignificant p-value (> 0.05)

**Supplementary Tables:**

Supplementary Table 1A. Four-factor solution with maximum likelihood extraction and varimax rotation of the SELF items in pilot study.

Supplementary Table 1B. Four-factor solution with maximum likelihood extraction and varimax rotation of the FAMILY items in pilot study.

Supplementary Table 1C. Four Factor solution with maximum likelihood extraction and varimax rotation of the SCHOOL items in pilot study.

Supplementary Table 1D. Four-factor solution with maximum likelihood extraction and varimax rotation of the COMMUNITY items in pilot study.



| 1  | Conceptually Developed Scales                                            | Revision 1 - Draft CRQ-C                                                             | Revision 2 - Final CRQ-C                                                             |
|----|--------------------------------------------------------------------------|--------------------------------------------------------------------------------------|--------------------------------------------------------------------------------------|
| 2  | <b>SELF</b>                                                              |                                                                                      |                                                                                      |
| 3  | <b>Self identity (9 items)</b>                                           |                                                                                      |                                                                                      |
| 4  | My child is a confident person                                           | <b>Positive self (7 items)</b>                                                       | <b>Positive self (5 items)</b>                                                       |
| 5  | My child is a brave person                                               |                                                                                      |                                                                                      |
| 6  | <b>Positive sense of self (7 items)</b>                                  | My child is a brave person                                                           | My child is a brave person                                                           |
| 7  |                                                                          | My child likes to try new things                                                     | My child likes to try new things                                                     |
| 8  | My child feels good about himself                                        | <b>Positive future (4 items)</b>                                                     | <b>Positive future (4 items)</b>                                                     |
| 9  | My child likes to try new things                                         |                                                                                      |                                                                                      |
| 10 | <b>Hopes /Expectations (7 items)</b>                                     | My child looks forward to growing up                                                 | My child looks forward to growing up                                                 |
| 11 | My child looks forward to growing up                                     | My child is hopeful about their life                                                 | My child is hopeful about their life                                                 |
| 12 | <b>Personal agency /self-efficacy (12 items)</b>                         | <b>Managing emotions/problems (6 items)</b>                                          | <b>Managing emotions/problems (3 items)</b>                                          |
| 13 | My child is good at sorting out problems                                 |                                                                                      |                                                                                      |
| 14 | My child won't try things if they might make a mistake                   | My child copes well if they have a problem                                           | My child copes well if they have a problem                                           |
| 15 | <b>Coping Skills (11 items)</b>                                          | My child knows how to calm down when they feel angry                                 | My child knows how to calm down when they feel angry                                 |
| 16 | My child has someone they can share their worries with                   |                                                                                      |                                                                                      |
| 17 | My child knows how to calm down when they feel angry                     |                                                                                      |                                                                                      |
| 18 | <b>FAMILY</b>                                                            |                                                                                      |                                                                                      |
| 19 | <b>Parent role / guidance (10 items)</b>                                 | <b>Guidance (5 items)</b>                                                            | <b>Guidance (3 items = 2 new items)</b>                                              |
| 20 | I teach my child life skills e.g. money, how to cook                     | I teach my child life skills e.g. money, how to cook                                 | I teach my child life skills e.g. money, how to cook                                 |
| 21 | My child is given responsibilities in our family e.g...                  | My child is given responsibilities in our family e.g...                              | My child is given responsibilities in our family e.g...                              |
| 22 | <b>Positive parent-child relship (8 items)</b>                           | <b>Connectedness (5 items)</b>                                                       | <b>Connectedness (5 items)</b>                                                       |
| 23 | My child talks to me about their feelings                                |                                                                                      |                                                                                      |
| 24 | I am close to my child                                                   | My child talks to me about their feelings                                            | My child talks to me about their feelings                                            |
| 25 | <b>Communication (8 items)</b>                                           | My child talks to me about what is happening in their life                           |                                                                                      |
| 26 | My child talks to me about what is happening in their life               |                                                                                      |                                                                                      |
| 27 | We talk things through in our family                                     |                                                                                      | <b>Connectedness (5 items)</b>                                                       |
| 28 | <b>Basic needs – family (7 items)</b>                                    |                                                                                      | My child talks to me about their feelings                                            |
| 29 | My child feels loved by our family                                       |                                                                                      | My child feels safe at home                                                          |
| 30 | I am able to look after my child needs e.g...                            | <b>Basic needs (6 items)</b>                                                         |                                                                                      |
| 31 |                                                                          | My child feels safe at home                                                          |                                                                                      |
| 32 | <b>Basic needs – home (6 items)</b>                                      | My child has their own space in our house                                            |                                                                                      |
| 33 | My child feels safe at home                                              |                                                                                      |                                                                                      |
| 34 | My child has their own space in our house                                |                                                                                      |                                                                                      |
| 35 | <b>FRIENDS</b>                                                           |                                                                                      |                                                                                      |
| 36 | <b>Friends (9 items)</b>                                                 | <b>Friends (5 items) RETURNED+ NEW</b>                                               |                                                                                      |
| 37 | My child has a close/best friend                                         | My child has a best/close friend                                                     |                                                                                      |
| 38 | My child would like to have more friends                                 | My child would like to have more friends                                             |                                                                                      |
| 39 | <b>SCHOOL</b>                                                            |                                                                                      |                                                                                      |
| 40 | <b>Belonging and safety (11 items)</b>                                   | <b>Belonging (7 items)</b>                                                           | <b>Belonging (5 items)</b>                                                           |
| 41 | My child gets bullied or teased at school                                | My child gets bullied or teased at school                                            | My child would like to have more friends                                             |
| 42 | My child feels they belong at their school                               | My child feels different to the other children at their school                       | My child gets bullied or teased at school                                            |
| 43 |                                                                          |                                                                                      | My child feels different to the other children at their school                       |
| 44 | <b>Engagement (9 items)</b>                                              | <b>Engagement (6 items)</b>                                                          | <b>Engagement (4 items)</b>                                                          |
| 45 | My child is interested in what they learn at school                      | My child is interested in what they learn at school                                  | My child is interested in what they learn at school                                  |
| 46 | Trying hard at school is important to my child                           | Trying hard at school is important to my child                                       | Trying hard at school is important to my child                                       |
| 47 | <b>Positive teacher-child relationships (10 items)</b>                   | <b>Teachers (6 items)</b>                                                            | <b>Teachers (4 items)</b>                                                            |
| 48 | The teachers help my child when they need it                             | The teachers help my child when they need it                                         | The teachers help my child when they need it                                         |
| 49 | The teachers let my child know when they are doing well                  | The teachers let my child know when they are doing well                              | The teachers let my child know when they are doing well                              |
| 50 | <b>Environment (10 items)</b>                                            |                                                                                      |                                                                                      |
| 51 | My child obeys the school rules                                          |                                                                                      |                                                                                      |
| 52 | My child enjoys attending their school                                   |                                                                                      |                                                                                      |
| 53 | <b>COMMUNITY</b>                                                         |                                                                                      |                                                                                      |
| 54 | <b>Connection to culture (14 items)</b>                                  | <b>Connection to culture (6 items)</b>                                               | <b>Connection to culture (5 items)</b>                                               |
| 55 | My child is proud of our family's culture                                | My child is connected to our family culture (e.g..)                                  | My child is connected to our family culture (e.g..)                                  |
| 56 | My child is strong because of our culture                                | My child is strong because of our family culture                                     | My child is strong because of our family culture                                     |
| 57 | <b>Religion/sprituallity/beliefs (7 items)</b>                           | <b>Religion / Spirituality (8 items)</b>                                             | <b>Religion / Spirituality (4 items)</b>                                             |
| 58 | My child is strong because of their religion or beliefs                  | My child is strong because of our family stories, values or spiritual beliefs        | My child is strong because of our family culture                                     |
| 59 | My child is connected to people through their religion, faith or stories | My child is connected to people through our spiritual beliefs or stories             | My child is strong because of our family stories, values or spiritual beliefs        |
| 60 | <b>Basic needs (10 items)</b>                                            | <b>LANGUAGE Opportunity to learn (6 items) NEW</b>                                   |                                                                                      |
| 61 | My child feels safe in the area where we live                            | I have had the opportunity to learn this language                                    |                                                                                      |
| 62 | Our family is happy living where we live                                 | Learning this language is important to me                                            |                                                                                      |
| 63 | <b>Community spaces/places (4 items)</b>                                 | <b>LANGUAGE Connectedness (6 items) NEW</b>                                          | <b>LANGUAGE Connectedness (4 items)</b>                                              |
| 64 | My child goes to a group or activity in our community e.g...             | My child can understand this language                                                | My child can understand this language                                                |
| 65 | My child enjoys going to community events/ activities                    | Understanding this language makes my child feel connected to our family or community | Understanding this language makes my child feel connected to our family or community |

## Supplementary Tables 1A – 1D

Table 1A. Four-factor solution with maximum likelihood extraction and varimax rotation of the SELF items.

|                                                                                | Factor           |                  |                  |                  |
|--------------------------------------------------------------------------------|------------------|------------------|------------------|------------------|
|                                                                                | 1                | 2                | 3                | 4                |
| <b>Managing emotions (positive)</b>                                            |                  |                  |                  |                  |
| My child knows how to manage their feelings                                    | 0.832            |                  |                  |                  |
| <del>My child is good at solving problems by themselves</del>                  | <del>0.718</del> |                  |                  |                  |
| My child copes well if they have a problem with friends (Revised) <sup>3</sup> | 0.620            | 0.311            |                  |                  |
| My child knows manage worried or anxious                                       | 0.599            |                  |                  |                  |
| My child knows how to calm down when they feel angry                           | 0.527            |                  | 0.395            |                  |
| <del>My child copes well problem at home<sup>4</sup></del>                     | <del>0.446</del> | <del>0.304</del> | <del>0.319</del> |                  |
| My child thinks about why things happen                                        | 0.436            |                  |                  |                  |
| <b>Managing emotions (negative) DROPPED</b>                                    |                  |                  |                  |                  |
| <del>My child worries making a mistake</del>                                   |                  |                  |                  | <del>0.688</del> |
| <del>My child worries about things going wrong</del>                           |                  |                  |                  | <del>0.665</del> |
| <del>My child wont try things if they might make a mistake</del>               |                  |                  |                  | <del>0.499</del> |
| <del>My child keeps their feelings inside</del>                                |                  |                  |                  | <del>0.413</del> |
| <b>Positive Self</b>                                                           |                  |                  |                  |                  |
| My child is a brave person                                                     |                  | 0.676            |                  |                  |
| My child is a confident person                                                 |                  | 0.625            |                  |                  |
| My child likes to try new things                                               |                  | 0.610            | 0.332            |                  |
| My child feels good about themselves                                           |                  | 0.559            | 0.438            |                  |
| My child is a strong person on the inside                                      | 0.315            | 0.524            |                  |                  |
| My child keeps trying even when things get hard                                | 0.383            | 0.446            |                  |                  |
| <del>My child is happy to be different from other kids</del>                   |                  | <del>0.328</del> |                  |                  |
| <b>Positive Future</b>                                                         |                  |                  |                  |                  |
| My child is positive about their future                                        |                  |                  | 0.692            |                  |
| My child is hopeful about their life                                           |                  |                  | 0.642            |                  |
| My child is positive about their life                                          |                  |                  | 0.620            |                  |
| My child looks forward to growing up                                           |                  |                  | 0.469            |                  |
| <del>My child can easily name things they are good at<sup>4</sup></del>        |                  | <del>0.355</del> | <del>0.373</del> |                  |
| <del>My child tries to work out why things go wrong<sup>4</sup></del>          |                  | <del>0.304</del> | <del>0.305</del> |                  |

<sup>1</sup> Deleted as low and equal loading on multiple factors.<sup>2</sup> Retained as consultations identified as conceptually important.<sup>3</sup> Revised to make more general (previously was a similar question for school, home and friends).

Table 1B. Four-factor solution with maximum likelihood extraction and varimax rotation of the FAMILY items.

|                                                                                                  | Factor           |                  |                  |        |
|--------------------------------------------------------------------------------------------------|------------------|------------------|------------------|--------|
|                                                                                                  | 1                | 2                | 3                | 4      |
| <b>Connectedness</b>                                                                             |                  |                  |                  |        |
| My child talks to me about their worries                                                         | 0.809            |                  |                  |        |
| My child talks to me about their feelings                                                        | 0.782            |                  |                  |        |
| My child talks to me about what is happening in their life                                       | 0.753            |                  |                  |        |
| <del>My child feels special in our family<sup>1</sup></del>                                      | <del>0.484</del> | <del>0.433</del> |                  |        |
| <del>I am interested in things that my child likes<sup>1</sup></del>                             | <del>0.424</del> | <del>0.352</del> |                  |        |
| I listen to my child <sup>2</sup>                                                                | 0.374            | 0.452            |                  |        |
| I am close to my child <sup>2</sup>                                                              | 0.364            | 0.379            |                  |        |
| <b>Basic needs</b>                                                                               |                  |                  |                  |        |
| My child feels safe at <i>our</i> home <sup>3</sup>                                              |                  | 0.603            |                  |        |
| My child likes being in our <del>house</del> <i>home</i> <sup>3</sup>                            |                  | 0.522            |                  |        |
| I am able to provide what my child needs                                                         |                  | 0.405            |                  |        |
| My child has their own space in <del>our house</del> <i>the place where we live</i> <sup>3</sup> |                  | 0.373            |                  |        |
| <i>My child feels they belong in the place where we live</i> <sup>4</sup>                        |                  |                  |                  | New    |
| <b>Guidance</b>                                                                                  |                  |                  |                  |        |
| My child helps with things like shopping                                                         |                  |                  | 0.665            |        |
| My child has responsibilities in family                                                          |                  |                  | 0.599            |        |
| I teach my child life skills e.g. money                                                          |                  |                  | 0.564            |        |
| <del>Our family enjoys visiting others<sup>1</sup></del>                                         |                  | <del>0.335</del> | <del>0.424</del> |        |
| Our family has routines                                                                          |                  |                  | 0.351            |        |
| <b>Friends</b>                                                                                   |                  |                  |                  |        |
| My child has a close/best friend                                                                 |                  |                  |                  | 0.637  |
| My child's friends come to our <del>house</del> <i>home</i> <sup>3</sup>                         |                  |                  |                  | 0.612  |
| My child would like to have more friends                                                         |                  |                  |                  | -0.370 |
| My child feels lonely                                                                            |                  |                  |                  | -0.367 |
| <i>My child has a friend they can talk to about their worries</i> <sup>4</sup>                   |                  |                  |                  | New    |
| <i>My child has a group of friends they have fun with</i> <sup>4</sup>                           |                  |                  |                  | New    |
| <i>My child finds it hard making friends</i> <sup>4</sup>                                        |                  |                  |                  | New    |

<sup>1</sup> Deleted as low and equal loading on two factors.<sup>2</sup> Retained as consultations identified as conceptually important.<sup>3</sup> Advised in consultations on wording changes to be more inclusive of different living arrangements, including not having a house.<sup>4</sup> Added through consultations to strengthen scale.

Table 1C. Four Factor solution with maximum likelihood extraction and varimax rotation of the SCHOOL items.

|                                                                                           | Factor           |        |                   |
|-------------------------------------------------------------------------------------------|------------------|--------|-------------------|
|                                                                                           | 1                | 2      | 3                 |
| <b>Teachers</b>                                                                           |                  |        |                   |
| Teachers listen to my child when have a problem                                           | 0.797            |        |                   |
| The teachers help my child when they need it                                              | 0.744            |        |                   |
| The teachers are fair                                                                     | 0.643            |        |                   |
| Teachers let child know when doing well                                                   | 0.620            |        |                   |
| My child has a teacher talk upset or angry                                                | 0.585            |        |                   |
| My child's school or teachers celebrate achievements                                      | 0.576            |        |                   |
| <b>Engagement</b>                                                                         |                  |        |                   |
| My child likes learning at school                                                         |                  | 0.822  |                   |
| Trying hard at school is important to my child                                            |                  | 0.738  |                   |
| My child is interested in what they learn at school                                       | 0.367            | 0.648  |                   |
| My child doesn't like going to school                                                     |                  | -0.448 | 0.353             |
| My child finishes work on time                                                            |                  | 0.395  |                   |
| <b>Belonging</b>                                                                          |                  |        |                   |
| My child is lonely at school                                                              |                  |        | 0.733             |
| My child gets bullied or teased at school                                                 |                  |        | 0.656             |
| <del>My child fits in at school<sup>1</sup></del>                                         | <del>0.358</del> |        | <del>-0.518</del> |
| My child feels different to the other children at their school                            |                  |        | 0.472             |
| My child gets in trouble at school                                                        |                  |        | 0.451             |
| <del>There are children similar to my child in their class<sup>2</sup></del>              |                  |        | <del>-0.353</del> |
| <del>There are other people like my child at their school<sup>2</sup></del>               |                  |        | <del>-0.344</del> |
| <i>My child feels comfortable in identifying with their culture at school<sup>3</sup></i> |                  |        | <i>New</i>        |
| <i>My child's school acknowledges/respects my child's culture<sup>3</sup></i>             |                  |        | <i>New</i>        |

<sup>1</sup> Identified as ambiguous/difficult to answer by respondents and in consultations.

<sup>2</sup> Dropped due to low factor loading and conceptual overlap with item above.

<sup>3</sup> Added after consultations to strengthen scale.

Table 1D. Four-factor solution with maximum likelihood extraction and varimax rotation of the COMMUNITY items.

|                                                                                                                             | Factor           |                  |        |       |
|-----------------------------------------------------------------------------------------------------------------------------|------------------|------------------|--------|-------|
|                                                                                                                             | 1                | 2                | 3      | 4     |
| <b>Connected to culture</b>                                                                                                 |                  |                  |        |       |
| My child is strong because of our culture                                                                                   | 0.773            |                  |        |       |
| <del>My child enjoys taking part in our family traditions<sup>2</sup></del>                                                 | <del>0.766</del> |                  |        |       |
| My child is connected to our family's culture (e.g. food, music, celebrations) <sup>5</sup>                                 | 0.675            |                  |        |       |
| My family's culture makes my child feel special                                                                             | 0.670            | 0.365            |        |       |
| My child likes going to events that celebrate our family's culture                                                          | 0.593            |                  |        |       |
| <del>My child is connected to spirit by being in country<sup>1</sup></del>                                                  | <del>0.518</del> |                  |        | 0.300 |
| <del>My child enjoys going to community events/activities<sup>2</sup></del>                                                 | <del>0.489</del> |                  | 0.438  |       |
| <del>My family tell stories about our family's history<sup>2</sup></del>                                                    | <del>0.469</del> |                  |        |       |
| <del>People in our community come together to celebrate events<sup>2</sup></del>                                            | <del>0.464</del> |                  |        |       |
| <del>Our family culture or values help my child when things are hard<sup>3</sup></del>                                      | <del>New</del>   |                  |        |       |
| <del>My child is connected to elders in our community (e.g. grandparents, aunts/uncles, respected adults)<sup>3</sup></del> | <del>New</del>   |                  |        |       |
| <del>My child looks to their elders (a respected older person) to guide them<sup>3</sup></del>                              | <del>New</del>   |                  |        |       |
| <del>My child is connected to elders (revised above)</del>                                                                  |                  |                  |        | 0.942 |
| <del>My child looks to elders for guidance (revised above)</del>                                                            |                  |                  |        | 0.680 |
| <b>Religion /Spirituality</b>                                                                                               |                  |                  |        |       |
| My child is connected to people through their religion, beliefs or stories                                                  |                  | 0.745            |        |       |
| My child connected to people through our church, mosque or temple                                                           |                  | 0.637            |        |       |
| My child is strong because of their religion or beliefs our family stories, values or spiritual beliefs <sup>3</sup>        |                  | 0.604            |        |       |
| <del>My child goes to a special place with our family<sup>2</sup></del>                                                     | <del>0.464</del> | <del>0.494</del> |        |       |
| <del>Our family talk or yarn about our stories, beliefs or values<sup>3</sup></del>                                         |                  | <del>New</del>   |        |       |
| <del>Our family stories or spiritual beliefs comfort my child when things are hard<sup>3</sup></del>                        |                  | <del>New</del>   |        |       |
| <del>My child can deal with problems better because of our family's beliefs, stories or values<sup>3</sup></del>            |                  | <del>New</del>   |        |       |
| <del>My child is connected to elders in our community (e.g. grandparents, aunts/uncles, respected adults)<sup>3</sup></del> |                  | <del>New</del>   |        |       |
| <b>Community-DROPPED More a measure of socio-economic status</b>                                                            |                  |                  |        |       |
| <del>Our family knows other families where we live</del>                                                                    | <del>0.323</del> |                  | 0.519  |       |
| <del>There are playgrounds or green spaces around where we live</del>                                                       |                  |                  | 0.478  |       |
| <del>I let my child play outside in the streets or parks where we live</del>                                                |                  |                  | 0.471  |       |
| <del>My child feels safe in the area where we live</del>                                                                    |                  |                  | 0.405  |       |
| <del>My child goes to a group or activity in our community</del>                                                            |                  |                  | 0.400  |       |
| <del>My child is involved in our community</del>                                                                            |                  |                  | 0.381  |       |
| <del>My child feels different from others in the commty where we live</del>                                                 |                  |                  | -0.336 |       |
| <del>There are places where we live that my child doesn't feel safe</del>                                                   |                  |                  |        |       |
| <b>Language - opportunity to learn<sup>3</sup></b>                                                                          |                  |                  |        |       |
| My child can speak this language                                                                                            |                  |                  |        | New   |
| My child can understand this language                                                                                       |                  |                  |        | New   |
| Learning this language is important to my child                                                                             |                  |                  |        | New   |
| My child would like to learn more of this language                                                                          |                  |                  |        | New   |
| My child has had the opportunity to learn this language                                                                     |                  |                  |        | New   |
| I encourage my child to learn this language                                                                                 |                  |                  |        | New   |
| <b>Language – connectedness<sup>3</sup></b>                                                                                 |                  |                  |        |       |
| A family member speaks to my child in this language                                                                         |                  |                  |        | New   |
| My child understands when people in our family/community are talking in this language                                       |                  |                  |        | New   |
| My child can easily talk to elders (respected older people) in this language                                                |                  |                  |        | New   |
| My child likes to talk to our family/relatives in this language                                                             |                  |                  |        | New   |
| Understanding this language makes my child feel special                                                                     |                  |                  |        | New   |
| Understanding this language makes my child feel connected to our family or community                                        |                  |                  |        | New   |

<sup>1</sup> Identified as difficult to answer by non-Aboriginal respondents.<sup>2</sup> Dropped due to low factor loading and/or conceptual overlap.<sup>3</sup> Added/revised after consultations to strengthen scale.

**STROBE 2007 (v4) Statement—Checklist of items that should be included in reports of *cross-sectional studies***

| Section/Topic                | Item # | Recommendation                                                                                                                                                                       | Reported on page # |
|------------------------------|--------|--------------------------------------------------------------------------------------------------------------------------------------------------------------------------------------|--------------------|
| <b>Title and abstract</b>    | 1      | (a) Indicate the study's design with a commonly used term in the title or the abstract                                                                                               | 2                  |
|                              |        | (b) Provide in the abstract an informative and balanced summary of what was done and what was found                                                                                  | 2                  |
| <b>Introduction</b>          |        |                                                                                                                                                                                      |                    |
| Background/rationale         | 2      | Explain the scientific background and rationale for the investigation being reported                                                                                                 | 4-5                |
| Objectives                   | 3      | State specific objectives, including any prespecified hypotheses                                                                                                                     | 5-6                |
| <b>Methods</b>               |        |                                                                                                                                                                                      |                    |
| Study design                 | 4      | Present key elements of study design early in the paper                                                                                                                              | 5                  |
| Setting                      | 5      | Describe the setting, locations, and relevant dates, including periods of recruitment, exposure, follow-up, and data collection                                                      | 6-7                |
| Participants                 | 6      | (a) Give the eligibility criteria, and the sources and methods of selection of participants                                                                                          | 6-7                |
| Variables                    | 7      | Clearly define all outcomes, exposures, predictors, potential confounders, and effect modifiers. Give diagnostic criteria, if applicable                                             | 8                  |
| Data sources/<br>measurement | 8*     | For each variable of interest, give sources of data and details of methods of assessment (measurement). Describe comparability of assessment methods if there is more than one group | 7-8                |
| Bias                         | 9      | Describe any efforts to address potential sources of bias                                                                                                                            | 5,13               |
| Study size                   | 10     | Explain how the study size was arrived at                                                                                                                                            |                    |
| Quantitative variables       | 11     | Explain how quantitative variables were handled in the analyses. If applicable, describe which groupings were chosen and why                                                         | 9-12               |
| Statistical methods          | 12     | (a) Describe all statistical methods, including those used to control for confounding                                                                                                | 8                  |
|                              |        | (b) Describe any methods used to examine subgroups and interactions                                                                                                                  | 12                 |
|                              |        | (c) Explain how missing data were addressed                                                                                                                                          | 8                  |
|                              |        | (d) If applicable, describe analytical methods taking account of sampling strategy                                                                                                   | N/A                |
|                              |        | (e) Describe any sensitivity analyses                                                                                                                                                | N/A                |
| <b>Results</b>               |        |                                                                                                                                                                                      |                    |

|                          |     |                                                                                                                                                                                                              |                  |
|--------------------------|-----|--------------------------------------------------------------------------------------------------------------------------------------------------------------------------------------------------------------|------------------|
| Participants             | 13* | (a) Report numbers of individuals at each stage of study—eg numbers potentially eligible, examined for eligibility, confirmed eligible, included in the study, completing follow-up, and analysed            | Table 1          |
|                          |     | (b) Give reasons for non-participation at each stage                                                                                                                                                         | N/A              |
|                          |     | (c) Consider use of a flow diagram                                                                                                                                                                           | N/A              |
| Descriptive data         | 14* | (a) Give characteristics of study participants (eg demographic, clinical, social) and information on exposures and potential confounders                                                                     | Table 1          |
|                          |     | (b) Indicate number of participants with missing data for each variable of interest                                                                                                                          | Table 2, Table 3 |
| Outcome data             | 15* | Report numbers of outcome events or summary measures                                                                                                                                                         | Table 3          |
| Main results             | 16  | (a) Give unadjusted estimates and, if applicable, confounder-adjusted estimates and their precision (eg, 95% confidence interval). Make clear which confounders were adjusted for and why they were included | 13               |
|                          |     | (b) Report category boundaries when continuous variables were categorized                                                                                                                                    | 12               |
|                          |     | (c) If relevant, consider translating estimates of relative risk into absolute risk for a meaningful time period                                                                                             | N/A              |
| Other analyses           | 17  | Report other analyses done—eg analyses of subgroups and interactions, and sensitivity analyses                                                                                                               | N/A              |
| <b>Discussion</b>        |     |                                                                                                                                                                                                              |                  |
| Key results              | 18  | Summarise key results with reference to study objectives                                                                                                                                                     | 13               |
| Limitations              | 19  | Discuss limitations of the study, taking into account sources of potential bias or imprecision. Discuss both direction and magnitude of any potential bias                                                   | 13-14            |
| Interpretation           | 20  | Give a cautious overall interpretation of results considering objectives, limitations, multiplicity of analyses, results from similar studies, and other relevant evidence                                   | 15               |
| Generalisability         | 21  | Discuss the generalisability (external validity) of the study results                                                                                                                                        | 15               |
| <b>Other information</b> |     |                                                                                                                                                                                                              |                  |
| Funding                  | 22  | Give the source of funding and the role of the funders for the present study and, if applicable, for the original study on which the present article is based                                                | 1                |

\*Give information separately for cases and controls in case-control studies and, if applicable, for exposed and unexposed groups in cohort and cross-sectional studies.

**Note:** An Explanation and Elaboration article discusses each checklist item and gives methodological background and published examples of transparent reporting. The STROBE checklist is best used in conjunction with this article (freely available on the Web sites of PLoS Medicine at <http://www.plosmedicine.org/>, Annals of Internal Medicine at <http://www.annals.org/>, and Epidemiology at <http://www.epidem.com/>). Information on the STROBE Initiative is available at [www.strobe-statement.org](http://www.strobe-statement.org).

# BMJ Open

**Development and validation of a multidimensional, culturally and socially inclusive Child Resilience Questionnaire (parent/caregiver report) to measure factors that support resilience: a community-based participatory research and psychometric testing study in Australia**

|                                 |                                                                                                                                                                                                                                                                                                                                                                                                                                                                                                                                                                                                                                                                                                                                                                                                                                                                                                          |
|---------------------------------|----------------------------------------------------------------------------------------------------------------------------------------------------------------------------------------------------------------------------------------------------------------------------------------------------------------------------------------------------------------------------------------------------------------------------------------------------------------------------------------------------------------------------------------------------------------------------------------------------------------------------------------------------------------------------------------------------------------------------------------------------------------------------------------------------------------------------------------------------------------------------------------------------------|
| Journal:                        | <i>BMJ Open</i>                                                                                                                                                                                                                                                                                                                                                                                                                                                                                                                                                                                                                                                                                                                                                                                                                                                                                          |
| Manuscript ID                   | bmjopen-2022-061129.R1                                                                                                                                                                                                                                                                                                                                                                                                                                                                                                                                                                                                                                                                                                                                                                                                                                                                                   |
| Article Type:                   | Original research                                                                                                                                                                                                                                                                                                                                                                                                                                                                                                                                                                                                                                                                                                                                                                                                                                                                                        |
| Date Submitted by the Author:   | 04-Apr-2022                                                                                                                                                                                                                                                                                                                                                                                                                                                                                                                                                                                                                                                                                                                                                                                                                                                                                              |
| Complete List of Authors:       | Gartland, Deirdre; Murdoch Children's Research Institute, Intergenerational Health; The University of Melbourne, Pediatrics<br>Riggs, Elisha; Murdoch Childrens Research Institute, Intergenerational Health; The University of Melbourne, Department of General Practice<br>Giallo, Rebecca; Murdoch Childrens Research Institute, Intergenerational Health<br>Glover, Karen; Murdoch Childrens Research Institute, Intergenerational Health; South Australian Health and Medical Research Institute Limited, Women and Kids theme<br>Stowe, Mardi; Victorian Foundation for Survivors of Torture<br>Mongta, Sharon; Djirra, Family Violence<br>Weetra, Donna; South Australian Health and Medical Research Institute Limited, Women and Families<br>Brown, Stephanie; Murdoch Children's Research Institute, Intergenerational Health; South Australian Health and Medical Research Institute Limited, |
| <b>Primary Subject Heading</b>: | Public health                                                                                                                                                                                                                                                                                                                                                                                                                                                                                                                                                                                                                                                                                                                                                                                                                                                                                            |
| Secondary Subject Heading:      | Paediatrics                                                                                                                                                                                                                                                                                                                                                                                                                                                                                                                                                                                                                                                                                                                                                                                                                                                                                              |
| Keywords:                       | Community child health < PAEDIATRICS, PUBLIC HEALTH, SOCIAL MEDICINE, PREVENTIVE MEDICINE                                                                                                                                                                                                                                                                                                                                                                                                                                                                                                                                                                                                                                                                                                                                                                                                                |
|                                 |                                                                                                                                                                                                                                                                                                                                                                                                                                                                                                                                                                                                                                                                                                                                                                                                                                                                                                          |

SCHOLARONE™  
Manuscripts





I, the Submitting Author has the right to grant and does grant on behalf of all authors of the Work (as defined in the below author licence), an exclusive licence and/or a non-exclusive licence for contributions from authors who are: i) UK Crown employees; ii) where BMJ has agreed a CC-BY licence shall apply, and/or iii) in accordance with the terms applicable for US Federal Government officers or employees acting as part of their official duties; on a worldwide, perpetual, irrevocable, royalty-free basis to BMJ Publishing Group Ltd ("BMJ") its licensees and where the relevant Journal is co-owned by BMJ to the co-owners of the Journal, to publish the Work in this journal and any other BMJ products and to exploit all rights, as set out in our [licence](#).

The Submitting Author accepts and understands that any supply made under these terms is made by BMJ to the Submitting Author unless you are acting as an employee on behalf of your employer or a postgraduate student of an affiliated institution which is paying any applicable article publishing charge ("APC") for Open Access articles. Where the Submitting Author wishes to make the Work available on an Open Access basis (and intends to pay the relevant APC), the terms of reuse of such Open Access shall be governed by a Creative Commons licence – details of these licences and which [Creative Commons](#) licence will apply to this Work are set out in our licence referred to above.

Other than as permitted in any relevant BMJ Author's Self Archiving Policies, I confirm this Work has not been accepted for publication elsewhere, is not being considered for publication elsewhere and does not duplicate material already published. I confirm all authors consent to publication of this Work and authorise the granting of this licence.

1  
2  
3  
4 **Development and validation of a multidimensional, culturally and socially inclusive Child**  
5 **Resilience Questionnaire (parent/caregiver report) to measure factors that support resilience: a**  
6 **community-based participatory research and psychometric testing study in Australia**  
7  
8  
9

10  
11 Dr D Gartland<sup>1,2</sup> (DPsych)

12  
13 Dr E Riggs<sup>1,3</sup> (PhD)

14  
15 Dr R Giallo<sup>1,3</sup> (PhD)

16  
17 Ms K Glover<sup>1,4</sup> (MBA)

18  
19 Ms M Stowe<sup>5</sup> (MSw)

20  
21 Ms S Mongta<sup>6</sup> (BSw)

22  
23 Ms D Weetra<sup>4</sup>

24  
25 Prof SJ Brown<sup>1, 2, 3, 4</sup> (PhD)

26  
27 and members of the Childhood Resilience Study Collaborative Group\*

28  
29 \*(Professor Helen Herman, Professor Kelsey Hegarty, A/Professor Jane Yelland, Ms Amanda Mitchell,  
30 Ms Selena White, Ms Tanya Koolmatrie, Ms Sue Casey, Mr Josef Szwarc, A/Professor Georgie Paxton)

31  
32  
33  
34  
35 <sup>1</sup> Intergenerational Health Research Group, Murdoch Children's Research Institute, Parkville,  
36 Melbourne Australia.

37  
38  
39 <sup>2</sup> Department of Paediatrics, University of Melbourne, Melbourne, Australia

40  
41 <sup>3</sup> Department of General Practice, University of Melbourne, Melbourne, Australia

42  
43 <sup>4</sup> South Australian Health and Medical Research Institute, Adelaide, Australia

44  
45 <sup>5</sup> Victorian Foundation for the Survivors of Torture, Melbourne, Australia

46  
47 <sup>6</sup> Wadja Aboriginal Family Place, Royal Children's Hospital, Melbourne, Australia

48  
49  
50  
51 **Keywords:** resilience, child, refugee, Indigenous, co-design, qualitative

52  
53 Corresponding Author: Dr Deirdre Gartland  
54 Murdoch Children's Research Institute, 50 Flemington Rd, Parkville, Victoria, Australia 3056.  
55 [deirdre.gartland@mcri.edu.au](mailto:deirdre.gartland@mcri.edu.au)  
56 +61 03 9386 6618

57  
58 Words:4418  
59  
60

## Abstract (300)

**Objective** Develop a comprehensive socially inclusive measure to assess child resilience factors.

**Design** A socio-ecological model of resilience, community based participatory research methods and two rounds of psychometric testing created the Child Resilience Questionnaire (parent/caregiver-, child-, school-report). The parent/caregiver report (CRQ-P/C) is the focus of this paper.

**Setting** Australia.

**Participants** Culturally and socially diverse parents/caregivers of children aged 5-12 years completed the CRQ-P/C in the pilot (n=489) and validation study (n=1114). Recruitment via a large tertiary hospital's outpatient clinics, Aboriginal and refugee background communities (Aboriginal and bicultural researchers networks) and nested follow-up of mothers in a pregnancy cohort and a cohort of Aboriginal families.

**Analysis** Exploratory and confirmatory factor analyses conducted to assess the structure and construct validity of CRQ-P/C subscales. Cronbach's alpha used to assess internal consistency of subscales. Criterion validity assessed with the Strengths and Difficulties Questionnaire (SDQ) parent-report.

**Results** Conceptually developed CRQ comprised 169 items in 19 subscales across five socio-ecological domains (self, family, friends, school and community). Two rounds of psychometric revision and community consultations created a CRQ-P/C with 43 items in 11 scales: self (positive self, positive future, managing emotions), family (connectedness, guidance, basic needs), school (teacher support, engagement, friends) and culture (connectedness, language). Excellent scale reliability ( $\alpha=0.7-0.9$ ), except *basic needs* scale ( $\alpha=0.61$ ) (where a highly endorsed item was retained for conceptual integrity). Criterion validity was supported: scales had low to moderate negative correlations with SDQ total difficulties score ( $R_s=-0.2/-0.5$ ,  $p<0.001$ ); children with emotion/behavioural difficulties had lower CRQ-P/C scores ( $\beta=-14.5$ , 95%CI -17.5 to -11.6, adjusted for gender).

**Conclusion** The CRQ-P/C is a new multidomain measure of factors supporting resilience in children. It has good psychometric properties and will have broad applications in clinical, educational and research settings. The tool also adds to the few culturally competent measures relevant to Aboriginal and refugee background communities.

### Strengths and limitations of this study

- Use of participatory methods and co-design processes to ensure content validity and a measure that is culturally and socially inclusive of diverse populations.
- Use of gold standard psychometric approaches, including confirmatory factor analysis to establish construct validity, and testing of criterion validity against the Strengths and Difficulties Questionnaire.
- While the families taking part represent a cross section of the Australian community, the measure may not work as well in other settings or communities not represented in our study.
- While we were able to assess criterion validity, the Strengths and Difficulties Questionnaire is not a gold standard measure of resilience as no such measure was available at the time of the study.

## Introduction

Children exposed to social adversity and trauma have higher risks of adverse behavioural, emotional, developmental, and physical health problems.(1-3) However, many children experiencing adversity have outcomes similar to peers who have not experienced the same level or type of adversity. Understanding what enables children to do well despite exposure to social adversity has been hampered by a lack of culturally and psychometrically validated measures.(4, 5)

Much resilience research has focused on identifying individuals or populations exposed to a specific adversity and using a measure of competence (e.g. academic or social) to identify individuals showing positive outcomes (6). These individuals are categorised as 'resilient'. Thus resilience is conceptualised as an 'outcome'. However, a growing number of studies look at resilience as the process by which positive or protective factors mediate a child's mental, academic, or social outcomes. (7-10) In an ecological-transactional model of resilience, each level of the environment - the child surrounded by their family, community and societal factors - contains risk and protective factors.(11, 12) Resilience can be seen as the process of drawing on available internal resources or the environment to develop, maintain or recover developmental or health outcomes, despite adversity.(13-15). As a lifelong process, resilience needs to be considered within the context of life course development and across these socio-ecological domains.

Some communities, including First Nations and refugee communities, experience a significantly higher cumulative load of early life stress and adversity. This can be linked to the impacts of colonisation, persecution, experiences of war, social disadvantage and intergenerational trauma. Despite these experiences, many of these communities demonstrate resilience, (16-19) but are poorly represented in the existing child resilience literature - as demonstrated in a systematic review conducted as part of this study.(20) The few resilience measures currently available are almost universally adult, or youth focused and developed without adequate consideration of cultural diversity. (21-24)

Middle childhood represents a neglected period in research and clinical work.(25) A number of disorders and psychopathologies such as depression, self-injury, substance use, and eating disorders commonly emerge in adolescence (26), but increasingly antecedents are being identified in childhood.(27, 28) Sandwiched between early childhood and adolescence, middle childhood represents a critical 'turning point' or transition, where appropriate intervention may significantly change a life course.(25, 29) Better evidence about factors supporting resilience in children experiencing adversity is essential to inform effective interventions.

1  
2  
3 A review of resilience measures conducted in 2011 stressed the lack of measures for children under  
4 12 years.(22). A more recent review identified few studies employing a psychometrically validated  
5 measure of resilience.(23) Of those using validated measures, the most commonly used were the  
6 Strengths and Difficulties Questionnaire (n=6) and the Child Behaviour Checklist (n=5), neither of  
7 which was designed to assess resilience. A systematic review of resilience factors associated with  
8 positive outcomes for adolescents in out-of-home care identified a greater number of resilience  
9 measures. The one study conducted with children ( $\leq 12$  years) used a scale from the *Child and*  
10 *Adolescent Needs and Strengths* measure to identify resilience. Seven of the remaining 16 studies  
11 included a standardised measure of resilience factors. Four measures were cited: Resilience Scale for  
12 Children and Adolescents (individual resilience factors only), the Child and Youth Resilience Measure  
13 (a multidomain brief measure developed and tested with adolescents and adults); the Adolescent  
14 Resilience Questionnaire (a multidomain adolescent measure), and the Resilience Scale (a  
15 multidomain adult measure). Finally, a measure developed to assess the social and emotional  
16 wellbeing of Indigenous youth - Strong Souls – includes a resilience scale that addresses individual  
17 and social aspects of resilience.(30) None of these measures were developed with children,  
18 specifically, children aged 5-12 years, nor do the measures address all domains in which resilience  
19 factors (and vulnerabilities) will exist. Greater scientific rigour and consistency in measurement tools  
20 is needed, particularly for children, including the development and validation of culturally and  
21 socially inclusive tools.(22, 23, 31-33)

22  
23  
24  
25  
26  
27  
28  
29  
30  
31  
32  
33  
34  
35  
36 This paper describes the development of the Child Resilience Questionnaire (CRQ), a culturally and  
37 socially inclusive multidimensional measure of factors supporting resilient child outcomes.  
38  
39 Community based participatory research methods and co-design with Aboriginal and refugee  
40 background communities (34, 35) were employed to create a measure with high cultural  
41 acceptability, reliability, and effectiveness for use in a range of diverse contexts. A parent/caregiver,  
42 child and teacher report were developed. The objectives of this paper are to describe: 1)  
43 development of the CRQ conceptual scales and items; 2) initial pilot testing of the parent/carer  
44 version (CRQ-P/C) assessing the overall structure and performance of individual items and scales;  
45 and 3) results of psychometric testing of the revised CRQ-P/C, including assessment of construct  
46 validity, criterion validity with the Strengths and Difficulties Questionnaire, and internal  
47 consistency/reliability.  
48  
49  
50  
51  
52  
53

## 54 **Methods**

55  
56 The study was designed to develop an inclusive, multidimensional measure of resilience in children  
57 that was relevant to a range of contexts in which children may encounter adversity and show  
58 resilience. Two methodological approaches were used to ensure participation by families with  
59  
60

1  
2  
3 diverse social and cultural backgrounds, adversity exposures and resilience factors: 1) the  
4 questionnaire was co-designed with Aboriginal and refugee background communities, populations  
5 with high levels of historic and current discrimination, intergenerational trauma, and violence  
6 exposures; and 2) families with a child suffering an illness or injury were recruited from outpatient  
7 clinics in a large public Victorian tertiary hospital. Public hospitals provide free healthcare, and the  
8 clinics are attended by large numbers of families every day, including urban and rural based families,  
9 with significant variation in economic, cultural and social backgrounds.

10  
11 Throughout every stage of the study, the following processes were used to embed community  
12 consultation, engagement and co-design. The study was conducted in partnership with the  
13 Aboriginal Health Council of South Australia, an Aboriginal family support unit in a large tertiary  
14 hospital in Victoria, and the lead provider of refugee counselling services in Victoria. These partners  
15 were involved in the funding application and study design as recommended in community  
16 consultation guidelines.<sup>(36-38)</sup> Working groups involving academic and non-academic (partner)  
17 study investigators were established to co-design research processes. The Aboriginal working group  
18 involved Aboriginal researchers, Aboriginal and non-Aboriginal study investigators, and  
19 representatives of partner organisations. The refugee working group involved study investigators,  
20 representatives of partner organisations, staff from the hospital's Immigrant Health Centre, refugee  
21 advocates and bicultural researchers employed on the study. Aboriginal researchers or bicultural  
22 workers were employed to work with their communities and networks to advertise the study and  
23 recruit families. As a member of the community, they ensured that the recruitment, consent and  
24 questionnaire administration were conducted in ways that promoted cultural safety and trust,  
25 including speaking to families in their preferred language.

26  
27 At each stage of the study, informed parent/caregiver written or verbal consent was required for  
28 participation, and parent/caregiver written or verbal consent was required for each child's  
29 participation. Participants were given a copy of the information statement, including contact details  
30 of study researchers. Researchers went through the study information statement with the family,  
31 covering the purpose of the study, confidentiality, use of the data etc. Researchers answered any  
32 questions, and parents wishing to participate then signed the consent form or verbally consented,  
33 with the researcher signing a verbal consent form on their behalf (important in Aboriginal and  
34 refugee background communities where language and literacy barriers can exist). Where parents  
35 gave signed consent for a child to participate, the child was also asked if they were happy to  
36 participate (informed assent).

1  
2  
3 The three stages in the development of the CRQ-P/C will be discussed in turn: 1) generation of  
4 potential items and development of conceptual subscales; 2) pilot testing of draft items; and 3)  
5 refinement and validation of final CRQ-P/C.  
6  
7  
8  
9

#### 10 1) Development of conceptual scales and items

11  
12 The draft CRQ was developed based on an ecological-transactional model of resilience, with input  
13 sought from diverse population groups to ensure variation in the type and severity of adversity  
14 experienced and the individual, family, and community level resilience factors that would be  
15 identified. The recruitment and conduct of discussion groups have been described elsewhere (39). In  
16 brief, resilience factors were identified in a systematic review of existing literature (20) and in  
17 discussion groups with people working with higher risk families, and parents and children of diverse  
18 backgrounds. These factors were grouped by the first author into socio ecological domains  
19 (individual, family, friends, school, and community). Conceptual scales and items were co-designed  
20 and three versions were created; a parent/caregiver version (CRQ-P/C) for children aged 5-12 years;  
21 a self-report version for children aged 7-12 years (CRQ-C); and a school staff version for children  
22 aged 5-12 years (CRQ-S). All development processes involved iterative consultation and community  
23 engagement as described above. While space limits this paper to describing the CRQ-P/C,  
24 publication of the CRQ-C and CRQ-S will follow.  
25  
26  
27  
28  
29  
30  
31  
32  
33

#### 34 Pilot study to test draft CRQ-P/C

35  
36 Parents/caregivers of children aged 5-12 years from diverse backgrounds and contexts in which  
37 children may encounter adversity and show resilience were recruited from four sources from June-  
38 December 2016.  
39  
40  
41

- 42 1) Aboriginal families were recruited via the community networks of Aboriginal investigators and  
43 researchers based in South Australia. Parents/caregivers of Aboriginal children were invited to  
44 complete the draft CRQ-P/C on paper.  
45  
46
- 47 2) The draft CRQ-P/C was included in a pilot follow-up questionnaire completed by mothers/carers  
48 of Aboriginal children aged 5-7 years in the Aboriginal Families Study, a community-based birth  
49 cohort of 344 Aboriginal families recruited in South Australia.  
50  
51  
52
- 53 3) Families of refugee background were recruited via community networks of bicultural researchers  
54 in four diverse communities: Assyrian Chaldean (from Iraq and Syria), Karen (from Burma), Tamil  
55 (from Sri Lanka) and Sierra Leone families (from Sierra Leone). Families completed the CRQ-P/C  
56 on paper in English, Karen, Arabic with assistance from the bicultural researcher as needed.  
57  
58  
59  
60



1  
2  
3 4) Representing the ‘general’ population, urban and rural families from diverse economic, cultural  
4 and social backgrounds were recruited in specialist outpatient clinics at a large tertiary children’s  
5 hospital. Families in the waiting areas were invited to complete the CRQ-P/C on paper while waiting  
6 for their child’s appointment.  
7  
8  
9

#### 10 Validation study

11  
12 As above, parents/caregivers of children aged 5-12 years from diverse backgrounds and a range of  
13 settings in which children may encounter adversity and show resilience were recruited between  
14 September 2017 - March 2020:  
15  
16

- 17  
18 1) Aboriginal families were recruited via community networks of Aboriginal investigators and  
19 researchers and completed the CRQ-P/C on iPad or paper. The CRQ-P/C was completed by  
20 mothers/caregivers of study children participating in the Aboriginal Families Study.  
21  
22
- 23  
24 2) Refugee background families were recruited via the community networks of the bicultural  
25 workers in four diverse communities: Assyrian Chaldean (from Iraq and Syria), Hazara (from  
26 Afghanistan), Karen (from Burma and Thailand); Sierra Leone families (from Sierra Leone).  
27 Parents/carers completed the CRQ-P/C on iPad or paper in English, Karen, Arabic or Dari as  
28 preferred.  
29  
30  
31
- 32  
33 3) Representing the ‘general’ population, urban and rural based families with diverse economic,  
34 cultural and social backgrounds were recruited in the specialist clinics of a tertiary children’s  
35 hospital. Parents/carers were randomised to complete the CRQ-P/C on iPad or paper.  
36  
37
- 38  
39 4) A sample of families were recruited via a pregnancy cohort study of 1507 first time mothers,  
40 followed up over 10 years (Maternal Health Study). Child exposure to intimate partner violence  
41 has been investigated in this cohort, with 1 in 3 exposed to IPV by age 10.(40) Mothers were  
42 invited to complete the CRQ-P/C using an online REDCap survey.  
43  
44

#### 45 **Measures**

##### 46 Child Resilience Questionnaire

47  
48 The CRQ-P/C comprises multiple scales across the individual, family, school and community domains.  
49 Figure 1 provides an outline of the domains, subscales and example items in the draft CRQ-P/C, pilot  
50 and final CRQ-P/C. The conceptually developed draft CRQ-P/C was over inclusive for testing  
51 purposes, with 169 items in 19 subscales.  
52  
53

54  
55 Parents/carers were asked, “How often are the following true for your child?”, with response  
56 options 0 “Not at all, 1 “Not often”, 2 “Sometimes”, 3 “Most of the time” 4 “All of the time”. To  
57 support respondents with limited literacy and/or familiarity with research questions, response  
58  
59  
60

options were accompanied by a pictogram of a glass that was empty ("Not at all") through to a full glass ("All of the time"). The CRQ-P/C was available in English, Arabic, Karen, and Dari. Translations were conducted by accredited translators. The translated versions were assessed by study bicultural workers and revised to ensure words and language style were appropriate for the local community involved.

### Strengths and Difficulties Questionnaire

As the most common measure of child resilience at the time of the study, the Strengths and Difficulties Questionnaire (SDQ) was included to test criterion validity. The measure comprises 25 statements on a 3-point scale (0=Not True to 2=Certainly True) assessing emotional and behavioural difficulties. Six subscales assess emotional symptoms, conduct problems, hyperactivity and inattention, peer problems, and prosocial behaviours. The SDQ total difficulties score is calculated based on the first five subscales, with higher scores indicating more difficulties. A pre-defined cut-off score of  $\geq 14$  was used to classify children scoring in the clinical range based on Australian norms.(41, 42)

### **Analysis**

Analyses of data collected in the pilot study and validation study was conducted iteratively. Descriptive statistics were used to summarise characteristics of the children (subject) and the parents/carers (respondent) completing the questionnaire.

### Pilot study

The distribution of item responses and missing data were examined. Items were removed if they had limited response sets, were highly skewed, or had a high proportion of missing data. Exploratory factor analyses (EFA) using maximum likelihood and varimax rotation in SPSS was then used to examine the factor structure within each domain.(43) Determination of the number of factors and items to retain was guided: by eigenvalues $>1$  (Kaiser's rule), scree plot, variance explained by the model, pattern of factor loadings, interpretability of the scale, and the conceptual underpinning of the scales.(44, 45)

### Validation study

The revised CRQ-P/C was employed in the validation study. Confirmatory Factor Analyses (CFA) were conducted using MPlus with robust maximum likelihood estimation on the covariance structures on the scales within each domain. The adequacy of the models was assessed using goodness-of-fit Chi Square ( $\chi^2$ ), and practical fit indices including the Comparative Fit Index, Goodness-of-Fit index (GFI) and Adjusted Goodness-of-Fit index (AGFI) with estimates of 0.90 or above indicating acceptable

1  
2  
3 model fit.(46) The Root Mean Square Error of Approximation (RMSEA) with values close to or below  
4 0.05 within the 90% confidence interval also indicated good model fit.(45) Standardised factor  
5 loadings, standardised residual covariances and modification indices were examined to identify  
6 model misfit. All modifications were theoretically driven based on the relevance of items to the scale  
7 and degree of redundancy.(43-45)  
8  
9

10 Internal scale consistency was examined using Cronbach Alpha, with 0.7-0.9 deemed good to  
11 excellent.(47, 48). Finally, criterion validity of the CRQ-P/C was assessed by examining the Pearsons'  
12 rank correlation between CRQ scale scores and SDQ total score.(43, 44, 48).  
13  
14  
15  
16

### 17 **Patient and public involvement**

18  
19 This study grew from community consultations being conducted in Aboriginal communities in rural,  
20 regional and remote South Australia. Community members wanted to better understand why some  
21 children and families were doing well, while others in similar situations were not doing so well.  
22 Representatives from the public were consulted at each stage. For example, the study recruitment  
23 and conduct of the study were guided by an Aboriginal Advisory Group, an Aboriginal Working  
24 Group and a refugee background working group, each of which included community members.  
25 Community Aboriginal staff and bicultural workers were employed to guide and conduct the  
26 research and consult on the findings at each stage. Authors on this paper include representatives  
27 from all of these groups (with the exception of our bicultural workers).  
28  
29  
30  
31  
32  
33  
34

### 35 **Results**

#### 36 Participants

37  
38 The recruitment sources and social characteristics of the children (subject) and their parents/carers  
39 (respondents) are outlined in Table 1 for the pilot and validation studies. The majority of children  
40 were Australian born, with a mean age of 9.7 (SD 1.6) in the pilot and 9.1 (SD 2.3) in the validation  
41 study, with slightly more boys than girls (52.8% compared to 47.2% in the validation sample).  
42 Targeted recruitment in the pilot and validation studies was successful in engaging a significant  
43 proportion of Aboriginal and/or Torres Strait Islander families (13.7 and 22.3 respectively) and  
44 refugee background families (17.6 and 10.0% respectively).  
45  
46  
47  
48  
49  
50  
51

#### 52 Pilot Study - Testing of items and CRQ-P/C structure

53  
54 The conceptually developed draft CRQ-P/C comprised 19 scales and 169 items. Examination of item  
55 distributions, missing values and participant feedback guided the exclusion of 74 items (self-domain-  
56 15; school-17, family-41; community-1). A very brief description of the factor analyses is provided  
57  
58  
59  
60

1  
2  
3 below, with comprehensive details prioritised for the validation study. (Factor solutions, item  
4 loadings and a record of decisions are detailed in Supplementary Table 1).

5  
6  
7 Self: A seven-factor solution was identified explaining 54.8% of the variance in scores. A four-factor  
8 solution was retained based on criteria described above. The factors reflected *Positive self*, *Positive*  
9 *Future*, *Managing emotions/problems (positive)* and *Managing emotions (negative)* (see Figure 1). A  
10 number of items were removed due to low communalities or low/multiple factor loadings. Given the  
11 conceptual overlap, the three-item factor *Managing emotions (negative)* was dropped, and a three-  
12 factor solution was accepted for validation.  
13  
14  
15  
16

17  
18 Family: A six-factor solution was identified, explaining 54.5% of the variance in scores. Four of the six  
19 conceptually developed scales were accepted for validation *Connectedness*, *Guidance*, *Basic needs*  
20 and *Friends*. Three items were dropped for loading on multiple factors. Two items in the  
21 *Connectedness* scale also loaded on the *Basic needs factor* (I listen to my child, I am close to my  
22 child). These items were retained as seen as conceptually important in consultations. The *Friends*  
23 scale had only two items loading at >0.4 and was revised for validation.  
24  
25  
26  
27

28  
29 School: A six-factor solution was identified explaining 59.1% of the variance in scores, with the first  
30 three factors retained reflecting *Belonging*, *Engagement*, *Teacher support* scales. One item identified  
31 as ambiguous/difficult to answer by respondents was deleted, and two items with low factor  
32 loadings were dropped.  
33  
34

35  
36 Community: A six-factor structure was identified, explaining 61.4% of the variance. Three scales  
37 were retained - *Connection to culture*, *Religion and Spirituality* and *Community* (see Figure 1). Five  
38 items were deleted due to low loadings and/or conceptual overlap. In consultations, it was agreed  
39 that *Connection to culture* and *Community* scales also overlapped conceptually. *Connection to*  
40 *culture* was retained as more congruent with the resilience literature, while *Community* appeared to  
41 be more related to what could be considered socio-economic factors (e.g. having green spaces,  
42 feeling safe in your community). Other changes made in this domain are described below.  
43  
44  
45  
46

47  
48 Consultation driven revisions: Working group, community and investigator consultations on the face  
49 and content validity of the revised CRQ resulted in three further alterations:  
50

51  
52 1) The community/culture domain was developed to capture resilience factors that were broadly  
53 relevant - not limited to overseas born or Aboriginal families. However, many respondents indicated  
54 they 'didn't have a culture' and skipped the section (mean missing data was 7.0 (SD=11.4) compared  
55 to 3.9 (SD=10.1) in self-domain or 5.1 (SD=11.6) in the school domain). A preamble was added asking  
56 respondents to tick a list of factors important to their family that reflected a diverse interpretation  
57  
58  
59  
60

1  
2  
3 of culture (e.g. the food you eat, family celebrations, family traditions, religion). It was hoped this  
4 would highlight the broad relevance of the section and encourage completion.  
5

6  
7 2) Language as a connection to culture was identified as a gap in the revised CRQ in consultations.  
8 Therefore, two new language scales (*Opportunity to learn, Connectedness*) were created for  
9 multilingual families through iterative consultations (See Figure 1).  
10

11  
12 3) Peer relationships are known to be associated with resilience, (20) but the two scales addressing  
13 them (*Friends and School Belonging*) did not form strong scales. These scales were revised and  
14 expanded through an iterative process of consultation and included in the school domain (See Figure  
15 1).  
16  
17

### 18 Validation study

19  
20 The revised CRQ-P/C comprised 81 items in 15 subscales (see Figure 1). Scale items, item  
21 descriptives (mean, standard deviation, skewness and kurtosis), initial and final confirmatory factor  
22 model fit and loadings are provided in Table 2 (self and family domains) and Table 3 (school and  
23 community domains). Actions taken to improve model fit in confirmatory factor analyses (CFA) are  
24 described below.  
25  
26

27  
28 Self: The CFA for *Positive Future* was a good fit to the data, and all four items retained. The one  
29 factor congeneric *Self-Identity* model did not have good fit. This improved with removal of item 1  
30 (poor response distribution). The CFA for *Managing Emotions* showed poor fit to the data.  
31 Sequential removal of three items with lowest factor loadings and/or conceptual overlap with other  
32 items resulted in a three-item subscale. The factor loadings for the remaining items were excellent  
33 (model fit indices not available for three item models).  
34  
35

36  
37 Family: The one factor congeneric model for *Connectedness* was a poor fit to the data. There was  
38 also redundancy between items. Item 2 was dropped as it had the lowest factor loading. Model fit  
39 was improved, and the remaining items had excellent factor loadings. In the *Basic Needs* scale, the  
40 item "My child feels safe at our home" was retained for conceptual integrity despite being endorsed  
41 by most respondents (poor distribution). Item 1 and 3 were very highly endorsed and overlapped  
42 conceptually with other items. Dropping these two items resulted in good model fit. Finally, the one  
43 factor congeneric model *Guidance* showed poor model fit indices. Item 3 was removed due to the  
44 low factor loading and potential variation and ambiguity in wording around what is right and wrong  
45 across families. The factor loadings for the remaining items were excellent.  
46  
47

48  
49 School: The one factor congeneric models for *Teacher support* and *Engagement* had inadequate fit  
50 indices, and the items with the lowest factor loadings were dropped sequentially to achieve good fit  
51  
52  
53  
54  
55  
56

1  
2  
3 indices. The one factor congeneric models for the *Belonging* and *Friends* scales did not fit the data.  
4  
5 Three and four factor CFA models were tested for this domain. The Teacher support and School  
6  
7 engagement factors were consistent in both models, but the Belonging and Friends items were  
8  
9 mixed. With compatibility between the two concepts, the decision was made to test a one factor  
10  
11 congeneric model with the Belonging and Friends items combined, retaining items that loaded on  
12  
13 the 3-factor model. Eight items were retained, but the model had very poor fit to the data.  
14  
15 Sequential removal of the worst performing seven items did not achieve good model fit, however  
16  
17 the factor loadings for the remaining three items from the *Friends* scale were excellent ( $\geq 0.75$ ) and  
18  
19 this scale was retained.

19 Culture: The added preamble to the culture section appeared to work well, with fewer missing items  
20  
21 (mean =1.3, SD=3.7). One item in the connectedness scale was identified in community consultations  
22  
23 as having poor face validity and was dropped (Our family culture makes my child feel special). The  
24  
25 one factor congeneric *Connectedness* scale model showed poor model fit. Two items with the lowest  
26  
27 factor loadings were removed. There was also redundancy between items 3 and 4. Item 3 was  
28  
29 retained as it was more concisely worded. Good model fit was achieved.

29 The items in the *Spirituality* scale had the highest level of missing data ( $\approx 10\%$ ). One item with poor  
30  
31 distribution was dropped. The one factor congeneric model of the remaining items showed very  
32  
33 poor fit. Sequentially dropping three items with the lowest loadings or conceptual overlap was  
34  
35 insufficient to achieve acceptable model fit. The three-item factor had poor face validity and was  
36  
37 dropped.

38 An EFA was conducted to assess the underlying factor structure for the two new language scales.  
39  
40 Scree plot and eigenvalues supported a one factor structure, explaining 21% of the variance,  
41  
42 comprising six of the eight *Connectedness* scale items. A one factor congeneric model of the six  
43  
44 items showed poor model fit. Dropping item 3 (lowest factor loading), followed by item 5  
45  
46 (overlapped conceptually with item 6), resulted in good model fit indices and excellent item factor  
47  
48 loadings.

### 49 **The final CRQ-P/C**

50  
51 The scale summary statistics and scale reliability are shown in Table 4. With the exception of the  
52  
53 *Basic Needs* scale in the family domain (Cronbach's  $\alpha = 0.61$ ), the final scales showed excellent  
54  
55 internal consistency (Cronbach's  $\alpha=0.73$  to  $0.88$ ), with high internal consistency for the  
56  
57 questionnaire as a whole (Cronbach's  $\alpha=0.93$ ).

58 Spearman's rank correlations between the CRQ-P/C scales are presented in Table 5. Generally,  
59  
60 correlations between the subscales were moderate and in the expected direction. Scales within the

1  
2  
3 same domain tended to be more highly correlated with each other than with scales in other  
4 domains. A strong correlation was observed between the *Positive Self* and *Positive Future* scales  
5 ( $r_s=0.66$ ,  $p<0.001$ ). As could be expected, the Culture *Language* subscale showed the lowest  
6 correlations with other scales, the highest correlation with the Culture *Connectedness* scale ( $r_s=0.23$ ,  
7  $p<0.001$ ), and was negatively correlated with the *Family Basic Needs* scale.

8  
9  
10  
11  
12 Parents/caregivers rated girls higher on average than boys on five subscales: *Positive self*, *Managing*  
13 *Emotions*, *Family Connectedness*, *School Engagement* and *Friends* (see Table 4). Overall, the CRQ-P/C  
14 mean total score (excluding the *Culture - Language* scale) for boys was lower than for girls ( $t_{839}=3.0$ ,  
15  $p=0.003$ ).

### 16 17 **Criterion validity**

18  
19  
20  
21  
22  
23  
24  
25  
26  
27  
28  
29  
30  
31  
32  
33  
34  
35  
36  
37  
38  
39  
40  
41  
42  
43  
44  
45  
46  
47  
48  
49  
50  
51  
52  
53  
54  
55  
56  
57  
58  
59  
60  
Criterion validity of the CRQ-P/C was assessed using the Strengths and Difficulties Questionnaire  
(SDQ). All CRQ-P/C scales showed low to moderate negative correlations with the SDQ total  
difficulties score. As would be expected given the content of the SDQ, the *Emotion Regulation* and  
*Friends* scales were the most highly correlated ( $r_s=-0.53$  and  $r_s=-0.45$  respectively). The total CRQ-P/C  
score was moderately negatively correlated with the SDQ total difficulties score ( $r_s=-0.47$ ).

Almost one in five children (18.4%) were identified as having clinically significant symptoms on the  
SDQ (total difficulties score  $\geq 14$ ). The mean CRQ-P/C total resilience score for children identified as  
having emotional and/or behavioral difficulties was lower than for children without difficulties  
(mean=103.4, SD=18.7 and 119.3, SD=15.5 respectively). Linear regression analysis identified  
children with difficulties scored lower on average on the CRQ-P/C by 14 points ( $\beta=-14.5$ , 95%CI -17.5  
to -11.6,  $p<0.001$ ), after adjusting for child gender.

### **Discussion**

Extensive community based participatory research methods ensured the Child Resilience  
Questionnaire has good content validity and addresses a broad range of factors that can support  
child resilience across diverse contexts. The pilot testing and validation involved large samples, with  
targeted recruitment of families from diverse backgrounds, including families known to experience  
greater social disadvantage, adversity and resilience.(49, 50) The final CRQ-P/C comprises 10 scales  
across the domains of self, family, school and culture, with 43 items in total. Good psychometric  
properties were attained. Subscale internal consistency reliability was excellent apart from the  
family *Basic needs* scale, which was adequate. Construct validity was supported, with all scales  
showing moderate negative correlation with the SDQ total difficulties score, and significantly lower  
mean resilience scores for children identified as having emotional and/or behavioral difficulties.

1  
2  
3 Several aspects of the CRQ-P/C are important for note. 1) Two scales in the Self-domain - *Positive*  
4 *self* and *Positive future* - were strongly correlated ( $r_s=0.66$ ). Further research is required to  
5 determine if it is sufficient to retain just one of these scales. 2) The family *Basic needs* scale showed  
6 only adequate internal consistency reliability (0.61), and almost a third of children (31%) were  
7 scored at the top of the scale range. Community consultations stressed that meeting basic family  
8 needs is a key factor underpinning child resilience. The scale addresses feeling safe at home, having  
9 routines, feeling special in your family, and having your own space in the place where you live.  
10 Despite very high positive endorsement, the item "I feel safe in my family" was retained for  
11 conceptual integrity. Children who are scored lower in this domain may be a particularly vulnerable  
12 group, with further research required to corroborate this. 3) The importance of cultural factors for  
13 resilient outcomes is not new.(19, 20, 51-53) What is new is the assessment of *connectedness* to  
14 culture and *language* as a connection to culture/community. Efforts were also made to assess  
15 potential strengths associated with a child's connection to religious and/or faith  
16 communities/institutions. Religion/spirituality was identified as potentially supporting child  
17 resilience in consultations, with mixed findings in the literature focused on adolescents or adults.(20)  
18 The spirituality/religion scale was unsuccessful. A high proportion of respondents skipped these  
19 items or, alternatively, responded with strong positive or negative endorsement of all items. It may  
20 be too disparate a factor to capture in a single scale, or a more distal factor for children than for  
21 adolescents or adults. Finally, the friends scale was not strongly consistent across the revisions but  
22 showed excellent scale reliability with three items. While friendships in middle childhood have been  
23 highlighted as developmentally important (25) and associated with positive self-worth and school  
24 engagement (54), most investigation in terms of resilience has been with adolescents.(55-57)  
25 Availability of the multidomain Child Resilience Questionnaire will facilitate investigation of the  
26 importance of specific resilience factors, such as friends, in different contexts (e.g. Aboriginal  
27 families) or adversities (e.g. family violence exposure) to advance our understanding of child  
28 resilience and how to support positive outcomes in the face of adversity.

29  
30  
31  
32  
33  
34  
35  
36  
37  
38  
39  
40  
41  
42  
43  
44  
45  
46  
47  
48  
49  
50  
51  
52  
53  
54  
55  
56  
57  
58  
59  
60  
Strengths of our study include use of: participatory methods and co-design processes to ensure  
content validity and cultural acceptability; and gold standard psychometric approaches, including  
confirmatory factor analysis to establish construct validity; and testing of criterion validity against  
the SDQ.(23). In addition, we recruited culturally diverse participants and employed a range of  
approaches to community consultation and co-design to ensure cultural validity of the CRQ-P/C.  
While our study has many strengths compared to previous research, there are important limitations  
to note. Our focus was children aged 5-12, and the measure may not be appropriate for use outside  
this age range. While the families taking part represent a cross-section of the Australian community,



1  
2  
3 the measure may not work as well in other settings, or in communities not represented in our study,  
4 for example, First Nation populations in other countries or refugee background communities not  
5 included in the development of the questionnaire. While we were able to assess criterion validity  
6 using the SDQ as a proxy measure of resilience, this is not a measure of resilience. No such measure  
7 existed at the time of the study. Further assessment against new resilience measures will enable  
8 more rigorous assessment. It was beyond the scope of this paper to report on the child report CRQ  
9 (CRQ-C) against the CRQ-P/C, but this is underway. Assessment of test-retest reliability and the  
10 psychometric properties of the CRQ-P/C in different populations, child ages and contexts are also  
11 planned.  
12  
13  
14  
15  
16  
17

### 18 **Conclusion**

19  
20 Resilience was originally seen as a static characteristic of an individual – unique heroic figures  
21 achieving remarkable things despite tragic childhoods. It is now better conceptualised as a more  
22 ‘ordinary magic’ (13) - a dynamic process of drawing on internal and external resources to adapt,  
23 recover or thrive despite adverse experiences. Thus, children who have access to resilience factors  
24 within themselves, and in their family, school and community will fare better in the face of adversity  
25 than children who are not similarly resourced. The CRQ-P/C is the first culturally and socially  
26 inclusive, multidomain measure of child resilience that reflects this paradigm shift. The measure will  
27 facilitate investigation of a child’s strengths or vulnerabilities across different aspects of their socio-  
28 ecological world. Availability of the first developmentally appropriate child measure with  
29 demonstrated content, construct validity, reliability and criterion validity will facilitate  
30 understanding of resilience across settings, contexts, adversities, and countries.  
31  
32  
33  
34  
35  
36  
37  
38  
39

40 Socially inclusive and culturally appropriate research methods and tools are fundamental to creating  
41 the evidence needed to guide interventions to support child resilience across diverse contexts and  
42 settings. This tool expands the extremely limited number of culturally inclusive measures available  
43 for use with Aboriginal and refugee background children.  
44  
45  
46

47 The CRQ-C/P will support more complex and nuanced examinations of child resilience, with wide  
48 ranging applications including in: clinical settings for starting conversations with families about a  
49 child’s strengths and potential vulnerabilities; evaluation of programs aimed at building child  
50 resilience; and finally, in child resilience research.  
51  
52  
53  
54  
55  
56  
57  
58  
59  
60

1  
2  
3 **Contributors:** DG ER RG KG SJB conceptualised the study; DG ER RG KG DW MS SM SJB and the CRS  
4 collaborative group co-designed this study. DG, ER DW, SM, facilitated discussion groups and  
5 undertook data collection for the discussion groups, pilot study and/or validation study; DG, RG  
6 conducted the analyses for this paper; DG ER RG KG DW MS SM SJB and CRS collaborative group  
7 interpreted the data; DG drafted the paper. All authors critically revised the paper, approved the  
8 manuscript to be published and are accountable for the accuracy and integrity of the work.  
9  
10  
11  
12

13  
14 **Acknowledgments:** We would like to acknowledge all the families who participated and made this  
15 project possible, and the Aboriginal researchers (additional to the authors) and bicultural workers  
16 who developed study processes, collected data in their communities, and guided interpretation of  
17 findings throughout the study.  
18  
19  
20

21  
22 **Competing interests:** There are no competing interests for any author.  
23  
24

25 **Ethics statement:** Ethics approval for all stages of the study was obtained from Royal Children's  
26 Hospital Human Research Ethics Committee (#34142, 34220,36142,37167A) and the South  
27 Australian Aboriginal Health Research Ethics Committee (04-14-585), and protocols were approved  
28 by study partner The Victorian Foundation for Survivors of Torture.  
29  
30  
31

32 **Funding:** This work was supported by the Australian National Health and Medical Research Council:  
33 Project Grants (#1064061, #1105561); Research Fellowship (SJB #1103976); Career Development  
34 Fellowship (RG #1109889); and the Safer Families CRE (DG #1198270); and the Myer Family  
35 Foundation (# N/A). Research conducted at the Murdoch Children's Research institute is supported  
36 by the Victorian Government's Operational Infrastructure program.  
37  
38  
39  
40

41 **Data availability statement:** No additional data available.  
42  
43  
44  
45  
46  
47  
48  
49  
50  
51  
52  
53  
54  
55  
56  
57  
58  
59  
60

## References

1. Kimber M, McTavish JR, Couturier J, Boven A, Gill S, Dimitropoulos G, et al. Consequences of child emotional abuse, emotional neglect and exposure to intimate partner violence for eating disorders: a systematic critical review. *BMC psychology*. 2017(1).
2. Hughes K, Bellis MA, Hardcastle KA, Sethi D, Butchart A, Mikton C, et al. The effect of multiple adverse childhood experiences on health: a systematic review and meta-analysis. *The Lancet Public Health*. 2017;2(8):e356-e66.
3. Kalmakis KA, Chandler GE. Health consequences of adverse childhood experiences: A systematic review. *Journal of the American Association of Nurse Practitioners*. 2015;27(8):457-65.
4. Khanlou N, Wray R. A Whole Community Approach toward Child and Youth Resilience Promotion: A Review of Resilience Literature. *International Journal of Mental Health and Addiction*. 2014;12(1):64-79.
5. Herrman H, Stewart D, Diaz-Granados N, Berger E, Jackson B, Yuen T. What is resilience? *Can J Psychiatry*. 2011;56(5):258-65.
6. Fraser E, Pakenham KI. Resilience in children of parents with mental illness: relations between mental health literacy, social connectedness and coping, and both adjustment and caregiving. *Psychol Health Med*. 2009;14(5):573-84.
7. Suárez-Soto E, Pereda N, Guilera G. Poly-victimization, resilience, and suicidality among adolescents in child and youth-serving systems. *Children and Youth Services Review*. 2019;106:104500.
8. Dirks MA, Persram R, Recchia HE, Howe N. Sibling relationships as sources of risk and resilience in the development and maintenance of internalizing and externalizing problems during childhood and adolescence. 2015. p. 145-55.
9. Domhardt M, Munzer A, Fegert JM, Goldbeck L. Resilience in Survivors of Child Sexual Abuse: A Systematic Review of the Literature. *Trauma, Violence & Abuse*. 2015;16(4):476-93.
10. Ben-David V, Jonson-Reid M. Resilience among adult survivors of childhood neglect: A missing piece in the resilience literature. *Children and Youth Services Review*. 2017;78:93-103.
11. Lynch M, Cicchetti D. An ecological-transactional analysis of children and contexts: The longitudinal interplay among child maltreatment, community violence and children's symptomatology. *Dev Psychopathol*. 1998;10:235-57.
12. Cicchetti D, Lynch M. Toward an ecological/transactional model of community violence and child maltreatment: consequences for children's development. *Psychiatry*. 1993;56(1):96-118.
13. Masten AS. Ordinary magic: Resilience processes in development. *American Psychologist*. 2001;56(3):227-38.
14. Cicchetti D. Annual Research Review: Resilient functioning in maltreated children – past, present, and future perspectives. *J Child Psychol Psychiatry*. 2013;54(4):402-22.
15. Rutter M. Annual Research Review: Resilience--clinical implications. *J Child Psychol Psychiatry*. 2013;54(4):474-87.
16. Pieloch KA, McCullough MB, Marks AK. Resilience of Children With Refugee Statuses: A Research Review. *Can Psychol*. 2016;57(4):330-9.

17. Tol WA, Song S, Jordans MJD. Resilience and mental health in children and adolescents living in areas of armed conflict - a systematic review of findings in low- and middle-income countries. *J Child Psychol Psychiatry*. 2013;54(4):445-60.
18. Merritt S. An Aboriginal Perspective on Resilience. *Aborig Isl Health Work J*. 2007;31(5):10.
19. Young C, Tong A, Nixon J, Fernando P, Kalucy D, Sherriff S, et al. Perspectives on childhood resilience among the Aboriginal community: an interview study. *Aust N Z J Public Health*. 2017;41(4):405-10.
20. Gartland D, Riggs E, Muyeen S, Giallo R, Afifi TO, MacMillan H, et al. What factors are associated with resilient outcomes in children exposed to social adversity? A systematic review. *BMJ Open*. 2019;9(4).
21. Gartland D. Resilience in adolescents: the development and preliminary psychometric testing of a new measure. Melbourne: Swinburne University; 2009.
22. Windle G, Bennett KM, Noyes J. A methodological review of resilience measurement scales. *Health Qual Life Outcomes*. 2011;9(1):8-25.
23. King L, Jolicoeur-Martineau A, Laplante DP, Szekely E, Levitan R, Wazana A. Measuring resilience in children: a review of recent literature and recommendations for future research. *Current Opinion in Psychiatry*. 2020.
24. Clauss-Ehlers CS. Sociocultural Factors, Resilience, and Coping: Support for a Culturally Sensitive Measure of Resilience. *J Appl Dev Psychol*. 2008;29(3):197-212.
25. DelGiudice M. Middle Childhood: An Evolutionary-Developmental Synthesis. In: Halfon N, Forrest CB, Lerner RM, Faustman EM, editors. *Handbook of Life Course Health Development*. Cham (CH): Springer Copyright 2018, The Author(s). 2018. p. 95-107.
26. Masten AS. Regulatory processes, risk, and resilience in adolescent development. *Annals New York Academy of Sciences*. 2004;1021:310-9.
27. Centers for Disease Control and Prevention. Data and Statistics on Children's Mental Health US Dept. Health and Human Services Mar 2021 [Available from: <https://www.cdc.gov/childrensmentalhealth/data.html>].
28. Australian Institute of Health and Welfare. Australia's Children. Cat. No. CWS 69. In: Youth Ca, editor. Canberra: AIHW2020.
29. Rutter M. Resilience concepts and findings: Implications for family therapy. *The Association for Family Therapy and Systemic Practice*. 1999;21:119-44.
30. Thomas A, Cairney S, Gunthorpe W, Paradies Y, Sayers S. Strong Souls: development and validation of a culturally appropriate tool for assessment of social and emotional well-being in Indigenous youth. *Aust N Z J Psychiatry*. 2010;44(1):40-8.
31. Luthar S, Cicchetti D, Becker B. The construct of resilience: A critical evaluation and guidelines for future work. *Child Dev*. 2000;71(3):543-62.
32. Liu D, Fairweather AK, Burns R, Roberts R. Measuring resilience: Difficulties, issues and recommendations. Australasian Society for Psychiatric Research (ASPR) Conference; Dec Fremantle, Perth2012.
33. Block K, Riggs E, Haslam N, editors. Values and vulnerabilities : the ethics of research with refugees and asylum seekers: Australian Academic Press; 2013.

34. Tremblay M-C, Martin DH, Macaulay AC, Pluye P. Can we Build on Social Movement Theories to Develop and Improve Community-Based Participatory Research? A Framework Synthesis Review. *Am J Community Psychol*. 2017;59(3-4):333-62.
35. Lucero J, Wallerstein N, Duran B, Alegria M, Greene-Moton E, Israel B, et al. Development of a Mixed Methods Investigation of Process and Outcomes of Community-Based Participatory Research. *Journal of Mixed Methods Research*. 2018;12(1):55-74.
36. National Health And Medical Research Council. Increasing cultural competency for healthier living & environments. 2005 25 Mar.
37. National Health and Medical Research Council. Ethical conduct in research with Aboriginal and Torres Strait Islander Peoples and communities: Guidelines for researchers and stakeholders. Commonwealth of Australia: Canberra; 2018.
38. Wardliparingga Aboriginal Research Unit. South Australian Aboriginal Health Research Accord. South Australian Health and Medical Research Council; 2014.
39. Gartland D, Riggs E, Giallo R, Glover K, Casey S, Muyeen S, et al. Using Participatory Methods to Engage Diverse Families in Research about Resilience in Middle Childhood. *Journal of Healthcare for the Poor and Underserved*. 2021;Nov (in press).
40. Gartland D, Conway LJ, Giallo R, Mensah FK, Cook F, Hegarty K, et al. Intimate partner violence and child outcomes at age 10: a pregnancy cohort. *Arch Dis Child*. 2021.
41. Hawes DJ, Dadds MR. Australian data and psychometric properties of the Strengths and Difficulties Questionnaire. *Australian & New Zealand Journal of Psychiatry*. 2004;38(8):644-51.
42. Hayes L. Problem behaviours in early primary school children: Australian normative data using the Strengths and Difficulties Questionnaire. *Aust N Z J Psychiatry*. 2007;41(3):231-8.
43. Cohen R, Schneider W, Tobin R. *Psychological Testing and Assessment: An introduction to tests and measurement*. Tenth ed: McGraw-Hill Education; 2021.
44. Boateng GO, Neilands TB, Frongillo EA, Melgar-Quiñonez HR, Young SL. Best Practices for Developing and Validating Scales for Health, Social, and Behavioral Research: A Primer. *Frontiers in Public Health*. 2018;6(149).
45. Shevlin M. Exploratory and confirmatory factor analysis in clinical and health psychology. In: Miles J, Gilbert P, editors. *A handbook of research methods for clinical and health psychology*. New York: Oxford University Press; 2005.
46. Hu L-t, Bentler PM. Cutoff criteria for fit indexes in covariance structure analysis: Conventional criteria versus new alternatives. *Structural Equation Modeling*. 1999;6(1):1-55.
47. Kline T. *Psychological Testing: A Practical Approach to Design and Evaluation*. London: SAGE Publications; 2005.
48. DeVon HA, Block ME, Moyle-Wright P, Ernst DM, Hayden SJ, Lazzara DJ, et al. A Psychometric Toolbox for Testing Validity and Reliability. *J Nurs Scholarsh*. 2007;39(2):155-64.
49. Kaplan I. *Rebuilding Shattered Lives*. Brunswick, Melbourne: Victorian Foundation for the Survivors of Torture.; 2020.
50. Herrman H. Sustainable Development Goals and the Mental Health of Resettled Refugee Women: A Role for International Organizations. *Frontiers in psychiatry*. 2019;10:608.
51. Ungar M. Researching and theorizing resilience across cultures and contexts. *Prev Med*. 2012;55(5):387 - 9.

- 1  
2  
3 52. Panter-Brick C, Eggerman M. Understanding culture, resilience, and mental health: The  
4 production of hope. In: Ungar M, editor. *The social ecology of resilience: A handbook of theory and*  
5 *practice*. New York, NY, US: Springer Science + Business Media; 2012. p. 369-86.  
6  
7 53. Jones JM. Exposure to chronic community violence: resilience in African American children. *J*  
8 *Black Psychol*. 2007;33(2):125-49.  
9  
10 54. Maunder R, Monks CP. Friendships in middle childhood: Links to peer and school  
11 identification, and general self-worth. *Br J Dev Psychol*. 2019;37(2):211-29.  
12  
13 55. Pawlby S, Mills A, Taylor A, Quinton D. Adolescent friendships mediating childhood adversity  
14 and adult outcome. *J Adolesc*. 1997;20:633-44.  
15  
16 56. Lansford JE, Criss MM, Pettit GS, Dodge KA, Bates JE. Friendship Quality, Peer Group  
17 Affiliation, and Peer Antisocial Behavior as Moderators of the Link Between Negative Parenting and  
18 Adolescent Externalizing Behavior. *Journal of Research on Adolescence* (Blackwell Publishing  
19 Limited). 2003;13(2):161.  
20  
21 57. Haddow S, Taylor EP, Schwannauer M. Positive peer relationships, coping and resilience in  
22 young people in alternative care: A systematic review. *Children and Youth Services Review*.  
23 2021;122:105861.  
24  
25  
26  
27  
28  
29  
30  
31  
32  
33  
34  
35  
36  
37  
38  
39  
40  
41  
42  
43  
44  
45  
46  
47  
48  
49  
50  
51  
52  
53  
54  
55  
56  
57  
58  
59  
60

**Table 1. Description of recruitment and participants**

|                                                  | Pilot Study      | Validation study  |
|--------------------------------------------------|------------------|-------------------|
|                                                  | n (%)            | n (%)             |
| <b>Respondents</b>                               |                  |                   |
| Recruitment source                               |                  |                   |
| Hospital Specialist Clinics                      | 339 (69.3)       | 499 (44.8)        |
| Refugee background communities                   | 86 (17.6)        | 111 (10.0)        |
| Aboriginal communities                           | 18 (3.7)         | 71 (6.4)          |
| Aboriginal Mother-Child cohort                   | 46 (9.4)         | 165 (14.8)        |
| General population Mother-Child cohort           |                  | 268 (24.1)        |
| Questionnaire format                             |                  |                   |
| Paper                                            | 489 (100)        | 271 (24.3)        |
| iPad                                             |                  | 588 (52.8)        |
| Online (REDCap)                                  |                  | 255 (22.9)        |
| Self-reported gender                             |                  |                   |
| Female                                           | 391 (81.6)       | 938 (84.7)        |
| Male                                             | 88 (18.4)        | 170 (15.3)        |
| Continent of birth                               |                  |                   |
| Australia                                        | 330 (69.0)       | 807 (72.7)        |
| Asia                                             | 97 (20.3)        | 199 (17.9)        |
| Europe                                           | 22 (4.6)         | 54 (4.9)          |
| Africa                                           | 25 (5.2)         | 35 (3.2)          |
| North America                                    | 2 (0.4)          | 9 (0.8)           |
| South America                                    | 2 (0.4)          | 6 (0.5)           |
| <b>CRQ-P/C Target child</b>                      |                  |                   |
| Australian born                                  |                  |                   |
| Yes                                              | 244 (76.5)       | 988 (89.2)        |
| No                                               | 75 (23.5)        | 120 (10.8)        |
| Child gender                                     |                  |                   |
| Female                                           |                  | 439 (47.2)        |
| Male                                             |                  | 491 (52.8)        |
| Age <i>Mean (SD)</i>                             |                  |                   |
| 5-6 years                                        | 9.7 (1.6)        | 9.1 (2.3)         |
| 7-8 years                                        | 6 (1.8)          | 230 (20.8)        |
| 9-10 years                                       | 86 (25.2)        | 225 (20.3)        |
| 11-12 years                                      | 132 (38.7)       | 240 (21.7)        |
| 13 years                                         | 111 (32.6)       | 410 (37)          |
| 13 years                                         | 6 (1.8)          | 3 (0.3)           |
| Aboriginal &/or Torres Strait Islander           | 67 (13.7)        | 247 (22.3)        |
| Community (refugee background families)          |                  |                   |
| Assyrian Chaldean (Iraq, Syria)                  | 30 (34.9)        | 29 (26.1)         |
| Karen (Burma, Thailand)                          | 25 (29.1)        | 30 (27.0)         |
| Sierra Leone (Sierra Leone)                      | 16 (18.6)        | 22 (19.8)         |
| Tamil (Sri Lanka)                                | 15 (17.4)        | -                 |
| Hazara (Afghanistan)                             | -                | 30 (27.0)         |
| Years in Australia (refugee background families) |                  |                   |
| Born in Australia                                | 15 (25.0)        | 33 (31.1)         |
| 1-2 years                                        | 10 (16.7)        | 33 (31.1)         |
| 3-5 years                                        | 16 (26.7)        | 21 (19.8)         |
| 6+ years                                         | 19 (31.6)        | 19 (17.9)         |
| <b>Total</b>                                     | <b>489 (100)</b> | <b>1114 (100)</b> |

1  
2 **Figure 1. CRQ-P/C scale progression from conceptual scales to final version**  
3  
4  
5  
6  
7  
8  
9  
10  
11  
12  
13  
14  
15  
16  
17  
18  
19  
20  
21  
22  
23  
24  
25  
26  
27  
28  
29  
30  
31  
32  
33  
34  
35  
36  
37  
38  
39  
40  
41  
42  
43  
44  
45  
46  
47  
48  
49  
50  
51  
52  
53  
54  
55  
56  
57  
58  
59  
60

CONFIDENTIAL  
For peer review only



Table 2. CRQ-P/C item summary, including standardised factor loadings from initial and final confirmatory factor models (CFA) for the SELF and FAMILY domains (n=1111)

| DOMAIN                            | Item                                         | N    | M (SD)    | Skew | Kurt | Model fit/ Factor loadings                |                                         |
|-----------------------------------|----------------------------------------------|------|-----------|------|------|-------------------------------------------|-----------------------------------------|
|                                   |                                              |      |           |      |      | Initial congeneric CFA                    | Final congeneric CFA                    |
| <b>SELF</b>                       |                                              |      |           |      |      |                                           |                                         |
|                                   |                                              |      |           |      |      | $\chi^2_{(14)}=124.20, p<.001; RMSEA=.09$ | $\chi^2_{(5)}=37.76, p<.001; RMSEA=.08$ |
|                                   |                                              |      |           |      |      | (.07, .10); CFI=.98; TLI=.98              | (.10); CFI=.99; TLI=.99                 |
| <b>Self-Identity</b>              |                                              |      |           |      |      |                                           |                                         |
| 1                                 | My child feels good...                       | 1110 | 3.1 (0.6) | -0.4 | 3.5  | .75                                       | -                                       |
| 2                                 | My child keeps trying ...                    | 1107 | 2.8 (0.8) | -0.3 | 2.8  | .70                                       | .70                                     |
| 3                                 | My child is a strong...                      | 1105 | 3.1 (0.8) | -0.6 | 3.2  | .82                                       | .83                                     |
| 4                                 | My child is a confident ..                   | 1108 | 2.9 (0.8) | -0.5 | 3.0  | .85                                       | .81                                     |
| 5                                 | My child likes to try....                    | 1111 | 3.0 (0.9) | -0.6 | 2.6  | .69                                       | .70                                     |
| 6                                 | My child is a brave ...                      | 1107 | 3.1 (0.8) | -0.7 | 3.1  | .76                                       | .78                                     |
|                                   |                                              |      |           |      |      | $\chi^2_{(2)}=22.90, p<.001; RMSEA=.10$   | No modifications                        |
|                                   |                                              |      |           |      |      | (.07, .14); CFI=.99; TLI=.99              |                                         |
| <b>Positive future</b>            |                                              |      |           |      |      |                                           |                                         |
| 1                                 | My child is positive about ...               | 1109 | 3.2 (0.8) | -0.7 | 3.5  | .84                                       | .84                                     |
| 2                                 | My child looks forward to...                 | 1109 | 3.2 (0.8) | -0.9 | 3.5  | .70                                       | .70                                     |
| 3                                 | My child is hopeful ...                      | 1108 | 3.3 (0.7) | -1.0 | 4.2  | .95                                       | .95                                     |
| 4                                 | My child is positive ...                     | 1102 | 3.3 (0.7) | -0.8 | 3.5  | .95                                       | .95                                     |
|                                   |                                              |      |           |      |      | $\chi^2_{(9)}=184.67, p<.001; RMSEA=.14$  | No fit indices for 3-item model         |
|                                   |                                              |      |           |      |      | (.12, .16); CFI=.99; TLI=.97              |                                         |
| <b>Managing emotions/problems</b> |                                              |      |           |      |      |                                           |                                         |
| 1                                 | My child thinks about the reasons ...        | 1107 | 2.8 (0.9) | -0.4 | 2.9  | .33                                       | -                                       |
| 2                                 | My child knows how to manage ...             | 1109 | 2.4 (0.9) | -0.3 | 2.9  | .84                                       | -                                       |
| 3                                 | My child copes well ...                      | 1108 | 2.5 (0.9) | -0.5 | 3.3  | .83                                       | .77                                     |
| 4                                 | My child knows how to calm ...               | 1108 | 2.4 (1.0) | -0.3 | 2.8  | .82                                       | .83                                     |
| 5                                 | My child knows how to manage ...             | 1107 | 2.5 (0.9) | -0.3 | 3.1  | .91                                       | .94                                     |
| 6                                 | My child worries about ...                   | 1104 | 2.0 (1.0) | -0.1 | 3.0  | .04                                       | -                                       |
| <b>FAMILY</b>                     |                                              |      |           |      |      |                                           |                                         |
|                                   |                                              |      |           |      |      | $\chi^2_{(5)}= 167.22, p<.001; RMSEA=.18$ | $\chi^2_{(2)}= 3.30, p=.192; RMSEA=.03$ |
|                                   |                                              |      |           |      |      | (.16, .20); CFI=.98 TLI=.97.              | (.00, .07); CFI=1.00; TLI=1.00          |
| <b>Connectedness</b>              |                                              |      |           |      |      |                                           |                                         |
| 1                                 | My child talks to me about ...               | 1075 | 3.1 (0.8) | -0.7 | 3.5  | .83                                       | .84                                     |
| 2                                 | I listen to my child ...                     | 1069 | 3.6 (0.6) | -0.8 | 3.0  | .61                                       | -                                       |
| 3                                 | My child talks to me about their feelings .. | 1072 | 3.2 (0.8) | -0.9 | 3.8  | .93                                       | .93                                     |
| 4                                 | My child talks to me about their worries...  | 1068 | 3.1 (0.9) | -0.8 | 3.4  | .89                                       | .89                                     |
| 5                                 | I am close ...                               | 1071 | 3.7 (0.5) | -1.8 | 6.6  | .75                                       | .70                                     |
|                                   |                                              |      |           |      |      | $\chi^2_{(9)}= 42.50, p<.001; RMSEA=.06$  | $\chi^2_{(2)}= 4.00, p=.135; RMSEA=.03$ |
|                                   |                                              |      |           |      |      | (.04, .08); CFI=.99; TLI=.98              | (.00, .08); CFI=1.00; TLI=.99           |
| <b>Basic needs</b>                |                                              |      |           |      |      |                                           |                                         |
| 1                                 | My child likes being ...                     | 1073 | 3.5 (0.6) | -1.3 | 5.3  | .71                                       | -                                       |
| 2                                 | My child feels safe ...                      | 1070 | 3.8 (0.5) | -2.3 | 8.6  | .77                                       | .67                                     |
| 3                                 | My child feels they belong...                | 1070 | 3.7 (0.6) | -2.1 | 8.6  | .82                                       | -                                       |
| 4                                 | Our family has routines ...                  | 1068 | 3.4 (0.7) | -1.0 | 3.5  | .58                                       | .61                                     |

|                 |                                        |      |           |      |     |                                                                       |                                 |
|-----------------|----------------------------------------|------|-----------|------|-----|-----------------------------------------------------------------------|---------------------------------|
| 5               | My child feels special ...             | 1069 | 3.4 (0.8) | -1.5 | 6.1 | .75                                                                   | .79                             |
| 6               | My child has own space...              | 1068 | 3.5 (0.8) | -2.1 | 7.4 | .58                                                                   | .60                             |
|                 |                                        |      |           |      |     | $\chi^2_{(2)}=10.03, p<.001; RMSEA=.06 (.03, .10); CFI=1.00; TLI=.99$ | No fit indices for 3-item model |
| <b>Guidance</b> |                                        |      |           |      |     |                                                                       |                                 |
| 1               | My child is given responsibilities ... | 1073 | 2.8 (1.0) | -0.6 | 2.8 | .73                                                                   | .72                             |
| 2               | My child helps with things like ...    | 1068 | 2.8 (1.0) | -0.3 | 2.3 | .79                                                                   | .82                             |
| 3               | Our family talks about ...             | 1068 | 3.6 (0.6) | -1.5 | 5.1 | .51                                                                   | -                               |
| 4               | I teach my child life ...              | 1071 | 3.3 (0.8) | -1.0 | 3.4 | .75                                                                   | .73                             |

For peer review only

CONFIDENTIAL

Table 3. CRQ-P/C item summary, including standardised factor loadings from initial and final confirmatory factor models (CFA) for the SCHOOL and COMMUNITY domains (n=1111)

| DOMAIN<br>Item                             | N    | M (SD)    | Skew | Kurt | Model fit/ Factor loadings                                              |                                                                      |
|--------------------------------------------|------|-----------|------|------|-------------------------------------------------------------------------|----------------------------------------------------------------------|
|                                            |      |           |      |      | Initial congeneric CFA                                                  | Final congeneric CFA                                                 |
| <b>SCHOOL</b>                              |      |           |      |      |                                                                         |                                                                      |
|                                            |      |           |      |      | $\chi^2_{(9)}=177.93, p<.001; RMSEA=.14 (.12, .15); CFI=.98; TLI=.97$   | $\chi^2_{(2)}=28.89, p<.001; RMSEA=.12 (.08,.15); CFI=1.00; TLI=.99$ |
| <b>Teachers</b>                            |      |           |      |      |                                                                         |                                                                      |
| 1 The teachers help ...                    | 1084 | 3.3 (0.8) | -0.9 | 3.5  | .79                                                                     | .80                                                                  |
| 2 The teachers listen to ....              | 1081 | 3.1 (0.8) | -0.8 | 3.3  | .84                                                                     | .88                                                                  |
| 3 My child’s school/teachers celebrate ... | 1078 | 3.3 (0.8) | -1.1 | 4.0  | .74                                                                     | -                                                                    |
| 4 My child has a teacher they can ...      | 1075 | 3.0 (1.0) | -0.9 | 3.3  | .75                                                                     | .76                                                                  |
| 5 The teachers let my child know ...       | 1078 | 3.2 (0.8) | -0.8 | 3.4  | .81                                                                     | .75                                                                  |
| 6 The teachers are fair ...                | 1070 | 3.2 (0.8) | -1.0 | 4.5  | .70                                                                     | -                                                                    |
|                                            |      |           |      |      | $\chi^2_{(9)}=99.86, p<.001; RMSEA=.10 (.08, .12); CFI=.98; TLI=.97$    | $\chi^2_{(2)}=25.41, p<.001; RMSEA=.10 (.07, .15); CFI=.99; TLI=.98$ |
| <b>Engagement</b>                          |      |           |      |      |                                                                         |                                                                      |
| 1 My child likes learning ...              | 1095 | 3.2 (0.8) | -1.0 | 3.7  | .89                                                                     | .88                                                                  |
| 2 My child doesn’t like ...                | 1082 | 3.2 (1.0) | -1.2 | 3.8  | .63                                                                     | -                                                                    |
| 3 My child is interested ...               | 1081 | 3.2 (0.8) | -0.9 | 3.4  | .88                                                                     | .88                                                                  |
| 4 Trying hard at school ...                | 1077 | 3.0 (1.0) | -0.8 | 3.2  | .68                                                                     | .71                                                                  |
| 5 My child finishes work ...               | 1061 | 2.8 (0.9) | -0.6 | 2.9  | .64                                                                     | .65                                                                  |
|                                            |      |           |      |      | $\chi^2_{(35)}=607.70, p<.001; RMSEA=.13 (.12, .14); CFI=.92; TLI=.90$  | No fit indices for 3-item model                                      |
| <b>Belonging PLUS Friend scale</b>         |      |           |      |      |                                                                         |                                                                      |
| 1 My child gets bullied ...                | 1083 | 3.0 (1.0) | -0.7 | 3.1  | .58                                                                     | -                                                                    |
| 3 My child feels comfortable ...           | 1073 | 3.2 (1.0) | -1.4 | 4.8  | -.39                                                                    | -                                                                    |
| 4 My child feels different ...             | 1075 | 3.0 (1.1) | -0.7 | 2.8  | .61                                                                     | -                                                                    |
| 5 My child gets in trouble ....            | 1081 | 3.2 (0.9) | -1.1 | 4.0  | .31                                                                     | -                                                                    |
| 6 My child is lonely ...                   | 1066 | 3.2 (0.9) | -1.2 | 3.9  | .80                                                                     | -                                                                    |
| 7 My child finds it hard ...               | 1090 | 2.9 (1.1) | -0.7 | 2.8  | .73                                                                     | -                                                                    |
| 8 My child would like to ...               | 1073 | 1.9 (1.2) | -0.0 | 2.1  | .48                                                                     | -                                                                    |
| 9 My child has a group of friends ...      | 1081 | 3.3 (0.8) | -1.1 | 4.4  | -.83                                                                    | .81                                                                  |
| 10 My child has a friend they can ...      | 1067 | 2.7 (1.1) | -0.6 | 2.8  | -.67                                                                    | .75                                                                  |
| 11 My child has a best ...                 | 1077 | 3.2 (1.0) | -1.3 | 4.3  | -.78                                                                    | .90                                                                  |
| <b>COMMUNITY</b>                           |      |           |      |      |                                                                         |                                                                      |
|                                            |      |           |      |      | $\chi^2_{(27)}= 568.07, p<.001; RMSEA=.14 (.13, .15); CFI=.96; TLI=.94$ | $\chi^2_{(2)}= 33.3, p<.001; RMSEA=.13 (.09,.17); CFI=.99; TLI=.98$  |
| <b>Culture</b>                             |      |           |      |      |                                                                         |                                                                      |
| 1 My child is strong because ...           | 1029 | 2.9 (0.9) | -0.9 | 3.9  | .78                                                                     | .83                                                                  |
| 2 My child is connected ...                | 1025 | 3.0 (0.9) | -0.9 | 3.7  | .80                                                                     | .81                                                                  |
| 3 My child can deal with problems ...      | 1026 | 2.8 (1.0) | -0.6 | 3.2  | .82                                                                     | -                                                                    |
| 4 Our family culture or values ...         | 1023 | 2.8 (0.9) | -0.6 | 3.2  | .85                                                                     | .81                                                                  |

|                                        |                                              |      |           |      |     |                                                                        |     |
|----------------------------------------|----------------------------------------------|------|-----------|------|-----|------------------------------------------------------------------------|-----|
| 5                                      | My child likes going to events ...           | 1011 | 3.1 (0.9) | -1.0 | 3.7 | .72                                                                    | -   |
| 6                                      | My child is connected to elders ...          | 1020 | 3.2 (1.1) | -1.3 | 3.9 | .63                                                                    | -   |
| 7                                      | My child is strong because of our family ... | 1016 | 2.9 (1.0) | -0.8 | 3.2 | .84                                                                    | .79 |
| 8                                      | Our family culture makes my ...              | 1003 | 2.9 (1.0) | -0.8 | 3.2 | -                                                                      | -   |
|                                        |                                              |      |           |      |     | $\chi^2_{(5)}=178.83, p<.001; RMSEA=.19 (.17, .21); CFI=.98; TLI=.96$  |     |
| <b>Religion / Spirituality</b>         |                                              |      |           |      |     |                                                                        |     |
| 1                                      | My child looks to their elders ...           | 1008 | 2.8 (1.1) | -0.7 | 2.7 | -                                                                      | -   |
| 2                                      | My child is connected to people ...          | 991  | 1.3 (1.5) | 0.7  | 2.0 | .69                                                                    | -   |
| 3                                      | My child is connected to people ...          | 997  | 2.1 (1.4) | -0.2 | 1.8 | .87                                                                    | -   |
| 4                                      | My child is connected to their spirit ...    | 966  | 2.0 (1.4) | -0.0 | 1.7 | .79                                                                    | -   |
| 5                                      | Our family talk or yarn about ...            | 1007 | 2.6 (1.1) | -0.6 | 2.6 | .84                                                                    | -   |
| 6                                      | Our family stories or spiritual beliefs ...  | 994  | 2.3 (1.3) | -0.3 | 2.1 | .89                                                                    | -   |
|                                        |                                              |      |           |      |     | Not Calculated                                                         |     |
| <b>Language – Opportunity to learn</b> |                                              |      |           |      |     |                                                                        |     |
| 1                                      | Learning this language ...                   | 488  | 2.5 (0.7) | -1.0 | 2.9 | Not Calculated                                                         |     |
| 2                                      | My child would like to learn ...             | 487  | 2.5 (0.6) | -1.1 | 3.0 | Not Calculated                                                         |     |
| 3                                      | My child has had the opportunity ...         | 491  | 2.5 (0.7) | -0.8 | 2.5 | Not Calculated                                                         |     |
| 4                                      | I encourage my child ...                     | 487  | 2.7 (0.5) | -1.5 | 4.3 | Not Calculated                                                         |     |
|                                        |                                              |      |           |      |     | $\chi^2_{(9)}=123.42, p<.001; RMSEA=.16 (.14, .19); CFI=0.99; TLI=.99$ |     |
| <b>Language – Connectedness</b>        |                                              |      |           |      |     |                                                                        |     |
| 1                                      | My child can speak ...                       | 496  | 2.1 (0.6) | -0.1 | 2.4 | .95                                                                    | .96 |
| 2                                      | My child can understand ...                  | 493  | 2.4 (0.6) | -0.5 | 2.3 | .94                                                                    | .95 |
| 3                                      | A family member speaks to ...                | 487  | 2.5 (0.6) | -0.9 | 2.8 | .85                                                                    | -   |
| 4                                      | My child understands when ...                | 488  | 2.4 (0.7) | -0.7 | 2.3 | .89                                                                    | .87 |
| 5                                      | My child can easily talk to ...              | 487  | 2.1 (0.8) | -0.2 | 1.6 | .90                                                                    | -   |
| 6                                      | My child likes to talk to ...                | 487  | 2.1 (0.8) | -0.2 | 1.7 | .91                                                                    | .86 |
| 7                                      | Understanding this language...feel special   | 482  | 2.5 (0.7) | -0.9 | 2.6 | -                                                                      | -   |
| 8                                      | Understanding this language...feel connected | 483  | 2.5 (0.7) | -1.0 | 2.9 | -                                                                      | -   |

$\chi^2_{(9)}=123.42, p<.001; RMSEA=.16 (.14, .19); CFI=0.99; TLI=.99$

$\chi^2_{(2)}=15.84, p<.001; RMSEA=.12 (.07,.18); CFI=1.00; TLI=1.00$

**Table 4. Summary of the final scales for the Child Resilience Questionnaire – Parent/Caregiver version**

|                                           | Items (range <sup>1</sup> ) | CRQ-P/C total sample |          |              |                   | Girls<br>(n=421) | Boys<br>(n=471) | T-test | P value |
|-------------------------------------------|-----------------------------|----------------------|----------|--------------|-------------------|------------------|-----------------|--------|---------|
|                                           |                             | n                    | Range    | Mean (SD)    | Cronbach $\alpha$ | Mean (SD)        | Mean (SD)       |        |         |
| <b>SELF</b>                               |                             |                      |          |              |                   |                  |                 |        |         |
| Positive self                             | 5 (0 - 20)                  | 1,112                | 2 - 20   | 14.8 (3.3)   | 0.83              | 15.2 (3.2)       | 14.8 (3.3)      | 2.0    | 0.042   |
| Positive future                           | 4 (0 - 16)                  | 1,111                | 0 - 16   | 12.8 (2.7)   | 0.87              | 13.0 (2.5)       | 12.8 (2.7)      | 1.1    | 0.256   |
| Managing emotions                         | 3 (0 - 12)                  | 1,100                | 0 - 12   | 7.1 (2.4)    | 0.86              | 7.8 (2.3)        | 7.2 (2.4)       | 3.6    | <0.001  |
| <b>FAMILY</b>                             |                             |                      |          |              |                   |                  |                 |        |         |
| Connectedness                             | 4 (0 - 16)                  | 1,071                | 3 - 16   | 13.0 (2.6)   | 0.85              | 13.3 (2.5)       | 12.9 (2.6)      | 2.0    | 0.046   |
| Basic Needs                               | 4 (0 - 16)                  | 1,070                | 6 - 16   | 14.1 (2.0)   | 0.61              | 14.1 (2.0)       | 14.1 (2.0)      | -0.1   | 0.898   |
| Guidance                                  | 3 (0 - 12)                  | 1,076                | 1 - 12   | 8.9 (2.3)    | 0.73              | 9.0 (2.3)        | 8.8 (2.3)       | 1.5    | 0.133   |
| <b>SCHOOL</b>                             |                             |                      |          |              |                   |                  |                 |        |         |
| Teacher Support                           | 4 (0 - 16)                  | 1,080                | 0 - 16   | 12.6 (2.8)   | 0.81              | 12.7 (2.6)       | 12.7 (2.8)      | 0.2    | 0.811   |
| Engagement                                | 4 (0 - 16)                  | 1,079                | 2 - 16   | 12.2 (2.8)   | 0.81              | 12.9 (2.5)       | 11.8 (3.0)      | 5.4    | <0.001  |
| Friends                                   | 3 (0 - 12)                  | 1,049                | 0 - 12   | 9.2 (2.4)    | 0.80              | 9.5 (3.3)        | 9.0 (2.4)       | 3.2    | 0.002   |
| <b>CULTURE</b>                            |                             |                      |          |              |                   |                  |                 |        |         |
| Connectedness                             | 5 (0 - 20)                  | 1,023                | 0 - 16   | 11.6 (3.2)   | 0.84              | 11.8 (3.3)       | 11.6 (3.1)      | 0.8    | 0.433   |
| Language <sup>2</sup>                     | 4 (0 - 8)                   | 489                  | 0 - 8    | 4.9 (2.3)    | 0.88              | 5.2 (2.3)        | 4.9 (2.3)       | 0.9    | 0.347   |
| CRQ total score                           | 39 (0 - 156)                | 1,062                | 57 - 152 | 115.8 (17.4) | 0.93              | 118.6 (16.7)     | 115.1 (17.6)    | 3.0    | 0.003   |
| CRQ total score (incl. lang) <sup>2</sup> | 43 (0 - 172)                | 480                  | 64 - 164 | 127.7 (18.4) | 0.93              | 130.0 (17.6)     | 127.9 (18.4)    | 1.2    | 0.249   |

<sup>1</sup> Response options ranged from 0 'Not at all' to 4 'All of the time', with exception of language where response options ranged from 0 'Not at all' to 2 'A lot'.

<sup>2</sup> Completed by multilingual families only.

**Table 5. Spearman's correlations between CRQ-P/C scales, total CRQ-P/C score and the Strengths and Difficulties Questionnaire (SDQ) total score**

| DOMAIN                                      | SELF                    |                           |                             | FAMILY                  |                       |                    | SCHOOL                    |                      |                   | CULTURE                 |                                | CRQ-P/C Total<br>n=1062 |
|---------------------------------------------|-------------------------|---------------------------|-----------------------------|-------------------------|-----------------------|--------------------|---------------------------|----------------------|-------------------|-------------------------|--------------------------------|-------------------------|
|                                             | Positive Self<br>n=1112 | Positive Future<br>n=1111 | Managing emotions<br>n=1100 | Connectedness<br>n=1071 | Basic Needs<br>n=1060 | Guidance<br>n=1063 | Teacher Support<br>n=1080 | Engagement<br>n=1079 | Friends<br>n=1079 | Connectedness<br>n=1023 | Language <sup>1</sup><br>n=489 |                         |
| CRQ-P/C Scale                               |                         |                           |                             |                         |                       |                    |                           |                      |                   |                         |                                |                         |
| <b>SELF</b>                                 |                         |                           |                             |                         |                       |                    |                           |                      |                   |                         |                                |                         |
| Positive Future                             | 0.661                   |                           |                             |                         |                       |                    |                           |                      |                   |                         |                                |                         |
| Emotion Regulation                          | 0.564                   | 0.547                     |                             |                         |                       |                    |                           |                      |                   |                         |                                |                         |
| <b>FAMILY</b>                               |                         |                           |                             |                         |                       |                    |                           |                      |                   |                         |                                |                         |
| Connectedness                               | 0.413                   | 0.443                     | 0.323                       |                         |                       |                    |                           |                      |                   |                         |                                |                         |
| Basic Needs                                 | 0.282                   | 0.383                     | 0.225                       | 0.499                   |                       |                    |                           |                      |                   |                         |                                |                         |
| Guidance                                    | 0.249                   | 0.273                     | 0.200                       | 0.449                   | 0.402                 |                    |                           |                      |                   |                         |                                |                         |
| <b>SCHOOL</b>                               |                         |                           |                             |                         |                       |                    |                           |                      |                   |                         |                                |                         |
| Teacher Support                             | 0.312                   | 0.319                     | 0.254                       | 0.349                   | 0.290                 | 0.241              |                           |                      |                   |                         |                                |                         |
| Engagement                                  | 0.456                   | 0.441                     | 0.427                       | 0.366                   | 0.314                 | 0.284              | 0.472                     |                      |                   |                         |                                |                         |
| Friends                                     | 0.373                   | 0.394                     | 0.403                       | 0.328                   | 0.282                 | 0.263              | 0.380                     | 0.377                |                   |                         |                                |                         |
| <b>CULTURE</b>                              |                         |                           |                             |                         |                       |                    |                           |                      |                   |                         |                                |                         |
| Connectedness                               | 0.378                   | 0.362                     | 0.318                       | 0.429                   | 0.406                 | 0.356              | 0.291                     | 0.304                | 0.289             |                         |                                |                         |
| Language (n=489)                            | 0.159                   | 0.100                     | 0.116                       | 0.120                   | -0.021 <sup>2</sup>   | 0.051 <sup>2</sup> | 0.072 <sup>2</sup>        | 0.192                | 0.001             | 0.233                   |                                |                         |
| <b>CRQ-P/C Total</b>                        | 0.713                   | 0.724                     | 0.637                       | 0.674                   | 0.569                 | 0.541              | 0.584                     | 0.682                | 0.634             | 0.634                   | 0.163                          |                         |
| <b>SDQ total difficulties score (n=980)</b> | -0.332                  | -0.324                    | -0.531                      | -0.213                  | -0.207                | -0.152             | -0.195                    | -0.394               | -0.449            | -0.217                  | -0.051 <sup>2</sup>            | -0.471                  |

<sup>1</sup> Completed by multilingual families only.<sup>2</sup> Nonsignificant p-value (> 0.05)

1  
2  
3  
4 **Supplementary Tables:**

5  
6 **Supplementary Table 1A. Four-factor solution with maximum likelihood extraction and varimax**  
7 **rotation of the SELF items in pilot study**  
8

9  
10 **Supplementary Table 1B. Four-factor solution with maximum likelihood extraction and varimax**  
11 **rotation of the FAMILY items in pilot study**  
12

13  
14 **Supplementary Table 1C. Four Factor solution with maximum likelihood extraction and varimax**  
15 **rotation of the SCHOOL items in pilot study**  
16

17  
18 **Supplementary Table 1D. Four-factor solution with maximum likelihood extraction and varimax**  
19 **rotation of the COMMUNITY items in pilot study**  
20  
21  
22  
23  
24  
25  
26  
27  
28  
29  
30  
31  
32  
33  
34  
35  
36  
37  
38  
39  
40  
41  
42  
43  
44  
45  
46  
47  
48  
49  
50  
51  
52  
53  
54  
55  
56  
57  
58  
59  
60

| 1  | Conceptually Developed Scales                                            | Revision 1 - Draft CRQ-C                                                             | Revision 2 - Final CRQ-C                                                             |
|----|--------------------------------------------------------------------------|--------------------------------------------------------------------------------------|--------------------------------------------------------------------------------------|
| 2  | <b>SELF</b>                                                              |                                                                                      |                                                                                      |
| 3  | <b>Self identity (9 items)</b>                                           |                                                                                      |                                                                                      |
| 4  | My child is a confident person                                           | <b>Positive self (7 items)</b>                                                       | <b>Positive self (5 items)</b>                                                       |
| 5  | My child is a brave person                                               |                                                                                      |                                                                                      |
| 6  | <b>Positive sense of self (7 items)</b>                                  | My child is a brave person                                                           | My child is a brave person                                                           |
| 7  |                                                                          | My child likes to try new things                                                     | My child likes to try new things                                                     |
| 8  | My child feels good about themselves                                     | <b>Positive future (4 items)</b>                                                     | <b>Positive future (4 items)</b>                                                     |
| 9  | My child likes to try new things                                         |                                                                                      |                                                                                      |
| 10 | <b>Hopes /Expectations (7 items)</b>                                     | My child looks forward to growing up                                                 | My child looks forward to growing up                                                 |
| 11 |                                                                          | My child is hopeful about their life                                                 | My child is hopeful about their life                                                 |
| 12 | <b>Personal agency /self-efficacy (12 items)</b>                         |                                                                                      |                                                                                      |
| 13 | My child is good at sorting out problems                                 | <b>Managing emotions/problems (6 items)</b>                                          | <b>Managing emotions/problems (3 items)</b>                                          |
| 14 | My child won't try things if they might make a mistake                   |                                                                                      |                                                                                      |
| 15 | <b>Coping Skills (11 items)</b>                                          | My child copes well if they have a problem                                           | My child copes well if they have a problem                                           |
| 16 |                                                                          | My child knows how to calm down when they feel angry                                 | My child knows how to calm down when they feel angry                                 |
| 17 | <b>FAMILY</b>                                                            |                                                                                      |                                                                                      |
| 18 | <b>Parent role / guidance (10 items)</b>                                 |                                                                                      |                                                                                      |
| 19 | I teach my child life skills e.g. money, how to cook                     | <b>Guidance (5 items)</b>                                                            | <b>Guidance (3 items = 2 new items)</b>                                              |
| 20 | My child is given responsibilities in our family e.g....                 |                                                                                      |                                                                                      |
| 21 | <b>Positive parent-child relship (8 items)</b>                           | My child talks to me about their feelings                                            | <b>Connectedness (5 items)</b>                                                       |
| 22 |                                                                          | I am close to my child                                                               |                                                                                      |
| 23 | <b>Communication (8 items)</b>                                           | My child talks to me about what is happening in their life                           | <b>Connectedness (5 items)</b>                                                       |
| 24 |                                                                          | We talk things through in our family                                                 |                                                                                      |
| 25 | <b>Basic needs – family (7 items)</b>                                    | <b>Basic needs (6 items)</b>                                                         | <b>Connectedness (5 items)</b>                                                       |
| 26 |                                                                          |                                                                                      |                                                                                      |
| 27 | I am able to look after my child needs e.g....                           | My child feels safe at home                                                          | My child feels safe at home                                                          |
| 28 | <b>Basic needs – home (6 items)</b>                                      | My child has their own space in our house                                            |                                                                                      |
| 29 |                                                                          | My child feels safe at home                                                          |                                                                                      |
| 30 | My child has their own space in our house                                |                                                                                      |                                                                                      |
| 31 |                                                                          |                                                                                      |                                                                                      |
| 32 |                                                                          |                                                                                      |                                                                                      |
| 33 | <b>FRIENDS</b>                                                           |                                                                                      |                                                                                      |
| 34 | <b>Friends (9 items)</b>                                                 |                                                                                      |                                                                                      |
| 35 | My child has a close/best friend                                         | <b>Friends (5 items) RETURNED+ NEW</b>                                               |                                                                                      |
| 36 | My child would like to have more friends                                 |                                                                                      |                                                                                      |
| 37 |                                                                          | My child has a best/close friend                                                     |                                                                                      |
| 38 |                                                                          | My child would like to have more friends                                             |                                                                                      |
| 39 | <b>SCHOOL</b>                                                            |                                                                                      |                                                                                      |
| 40 | <b>Belonging and safety (11 items)</b>                                   |                                                                                      | <b>Belonging (5 items)</b>                                                           |
| 41 | My child gets bullied or teased at school                                | <b>Belonging (7 items)</b>                                                           | My child would like to have more friends                                             |
| 42 | My child feels they belong at their school                               |                                                                                      |                                                                                      |
| 43 | My child is interested in what they learn at school                      | <b>Engagement (6 items)</b>                                                          | <b>Engagement (4 items)</b>                                                          |
| 44 | Trying hard at school is important to my child                           |                                                                                      |                                                                                      |
| 45 | My child is interested in what they learn at school                      | <b>Teachers (6 items)</b>                                                            | <b>Teachers (4 items)</b>                                                            |
| 46 | Trying hard at school is important to my child                           |                                                                                      |                                                                                      |
| 47 | <b>Positive teacher-child relationships (10 items)</b>                   |                                                                                      |                                                                                      |
| 48 | The teachers help my child when they need it                             | <b>Environment (10 items)</b>                                                        |                                                                                      |
| 49 | The teachers let my child know when they are doing well                  |                                                                                      |                                                                                      |
| 50 | My child obeys the school rules                                          | <b>Connection to culture (6 items)</b>                                               | <b>Connection to culture (5 items)</b>                                               |
| 51 | My child enjoys attending their school                                   |                                                                                      |                                                                                      |
| 52 | My child is proud of our family's culture                                | <b>Connection to culture (6 items)</b>                                               | <b>Connection to culture (5 items)</b>                                               |
| 53 | My child is strong because of our culture                                |                                                                                      |                                                                                      |
| 54 | <b>Religion/sprituallity/beliefs (7 items)</b>                           | My child is strong because of our family culture                                     | My child is connected to our family culture (e.g...)                                 |
| 55 |                                                                          | My child is strong because of their religion or beliefs                              | My child is strong because of our family culture                                     |
| 56 | My child is connected to people through their religion, faith or stories | <b>Religion / Spirituality (8 items)</b>                                             | <b>Religion / Spirituality (8 items)</b>                                             |
| 57 | My child is connected to people through our spiritual beliefs or stories |                                                                                      |                                                                                      |
| 58 | <b>Basic needs (10 items)</b>                                            | <b>LANGUAGE Opportunity to learn (6 items) NEW</b>                                   |                                                                                      |
| 59 |                                                                          | My child feels safe in the area where we live                                        | I have had the opportunity to learn this language                                    |
| 60 | Our family is happy living where we live                                 | Learning this language is important to me                                            |                                                                                      |
| 61 | <b>Community spaces/places (4 items)</b>                                 |                                                                                      |                                                                                      |
| 62 | My child goes to a group or activity in our community e.g....            | <b>LANGUAGE Connectedness (6 items) NEW</b>                                          | <b>LANGUAGE Connectedness (4 items)</b>                                              |
| 63 | My child enjoys going to community events/ activities                    |                                                                                      |                                                                                      |
| 64 |                                                                          | My child can understand this language                                                | My child can understand this language                                                |
| 65 |                                                                          | Understanding this language makes my child feel connected to our family or community | Understanding this language makes my child feel connected to our family or community |



## Supplementary Tables 1A – 1D

Table 1A. Four-factor solution with maximum likelihood extraction and varimax rotation of the SELF items.

|                                                                                | Factor           |                  |                  |                  |
|--------------------------------------------------------------------------------|------------------|------------------|------------------|------------------|
|                                                                                | 1                | 2                | 3                | 4                |
| <b>Managing emotions (positive)</b>                                            |                  |                  |                  |                  |
| My child knows how to manage their feelings                                    | 0.832            |                  |                  |                  |
| <del>My child is good at solving problems by themselves</del>                  | <del>0.718</del> |                  |                  |                  |
| My child copes well if they have a problem with friends (Revised) <sup>3</sup> | 0.620            | 0.311            |                  |                  |
| My child knows manage worried or anxious                                       | 0.599            |                  |                  |                  |
| My child knows how to calm down when they feel angry                           | 0.527            |                  | 0.395            |                  |
| <del>My child copes well problem at home<sup>4</sup></del>                     | <del>0.446</del> | <del>0.304</del> | <del>0.319</del> |                  |
| My child thinks about why things happen                                        | 0.436            |                  |                  |                  |
| <b>Managing emotions (negative) DROPPED</b>                                    |                  |                  |                  |                  |
| <del>My child worries making a mistake</del>                                   |                  |                  |                  | <del>0.688</del> |
| <del>My child worries about things going wrong</del>                           |                  |                  |                  | <del>0.665</del> |
| <del>My child wont try things if they might make a mistake</del>               |                  |                  |                  | <del>0.499</del> |
| <del>My child keeps their feelings inside</del>                                |                  |                  |                  | <del>0.413</del> |
| <b>Positive Self</b>                                                           |                  |                  |                  |                  |
| My child is a brave person                                                     |                  | 0.676            |                  |                  |
| My child is a confident person                                                 |                  | 0.625            |                  |                  |
| My child likes to try new things                                               |                  | 0.610            | 0.332            |                  |
| My child feels good about themselves                                           |                  | 0.559            | 0.438            |                  |
| My child is a strong person on the inside                                      | 0.315            | 0.524            |                  |                  |
| My child keeps trying even when things get hard                                | 0.383            | 0.446            |                  |                  |
| <del>My child is happy to be different from other kids</del>                   |                  | <del>0.328</del> |                  |                  |
| <b>Positive Future</b>                                                         |                  |                  |                  |                  |
| My child is positive about their future                                        |                  |                  | 0.692            |                  |
| My child is hopeful about their life                                           |                  |                  | 0.642            |                  |
| My child is positive about their life                                          |                  |                  | 0.620            |                  |
| My child looks forward to growing up                                           |                  |                  | 0.469            |                  |
| <del>My child can easily name things they are good at<sup>4</sup></del>        |                  | <del>0.355</del> | <del>0.373</del> |                  |
| <del>My child tries to work out why things go wrong<sup>4</sup></del>          |                  | <del>0.304</del> | <del>0.305</del> |                  |

<sup>1</sup> Deleted as low and equal loading on multiple factors.<sup>2</sup> Retained as consultations identified as conceptually important.<sup>3</sup> Revised to make more general (previously was a similar question for school, home and friends).

Table 1B. Four-factor solution with maximum likelihood extraction and varimax rotation of the FAMILY items.

|                                                                                                  | Factor           |                  |                  |        |
|--------------------------------------------------------------------------------------------------|------------------|------------------|------------------|--------|
|                                                                                                  | 1                | 2                | 3                | 4      |
| <b>Connectedness</b>                                                                             |                  |                  |                  |        |
| My child talks to me about their worries                                                         | 0.809            |                  |                  |        |
| My child talks to me about their feelings                                                        | 0.782            |                  |                  |        |
| My child talks to me about what is happening in their life                                       | 0.753            |                  |                  |        |
| <del>My child feels special in our family<sup>1</sup></del>                                      | <del>0.484</del> | <del>0.433</del> |                  |        |
| <del>I am interested in things that my child likes<sup>1</sup></del>                             | <del>0.424</del> | <del>0.352</del> |                  |        |
| I listen to my child <sup>2</sup>                                                                | 0.374            | 0.452            |                  |        |
| I am close to my child <sup>2</sup>                                                              | 0.364            | 0.379            |                  |        |
| <b>Basic needs</b>                                                                               |                  |                  |                  |        |
| My child feels safe at <i>our</i> home <sup>3</sup>                                              |                  | 0.603            |                  |        |
| My child likes being in our <del>house</del> <i>home</i> <sup>3</sup>                            |                  | 0.522            |                  |        |
| I am able to provide what my child needs                                                         |                  | 0.405            |                  |        |
| My child has their own space in <del>our house</del> <i>the place where we live</i> <sup>3</sup> |                  | 0.373            |                  |        |
| <i>My child feels they belong in the place where we live</i> <sup>4</sup>                        |                  |                  |                  | New    |
| <b>Guidance</b>                                                                                  |                  |                  |                  |        |
| My child helps with things like shopping                                                         |                  |                  | 0.665            |        |
| My child has responsibilities in family                                                          |                  |                  | 0.599            |        |
| I teach my child life skills e.g. money                                                          |                  |                  | 0.564            |        |
| <del>Our family enjoys visiting others<sup>1</sup></del>                                         |                  | <del>0.335</del> | <del>0.424</del> |        |
| Our family has routines                                                                          |                  |                  | 0.351            |        |
| <b>Friends</b>                                                                                   |                  |                  |                  |        |
| My child has a close/best friend                                                                 |                  |                  |                  | 0.637  |
| My child's friends come to our <del>house</del> <i>home</i> <sup>3</sup>                         |                  |                  |                  | 0.612  |
| My child would like to have more friends                                                         |                  |                  |                  | -0.370 |
| My child feels lonely                                                                            |                  |                  |                  | -0.367 |
| <i>My child has a friend they can talk to about their worries</i> <sup>4</sup>                   |                  |                  |                  | New    |
| <i>My child has a group of friends they have fun with</i> <sup>4</sup>                           |                  |                  |                  | New    |
| <i>My child finds it hard making friends</i> <sup>4</sup>                                        |                  |                  |                  | New    |

<sup>1</sup> Deleted as low and equal loading on two factors.<sup>2</sup> Retained as consultations identified as conceptually important.<sup>3</sup> Advised in consultations on wording changes to be more inclusive of different living arrangements, including not having a house.<sup>4</sup> Added through consultations to strengthen scale.

Table 1C. Four Factor solution with maximum likelihood extraction and varimax rotation of the SCHOOL items.

|                                                                                           | Factor           |        |                   |
|-------------------------------------------------------------------------------------------|------------------|--------|-------------------|
|                                                                                           | 1                | 2      | 3                 |
| <b>Teachers</b>                                                                           |                  |        |                   |
| Teachers listen to my child when have a problem                                           | 0.797            |        |                   |
| The teachers help my child when they need it                                              | 0.744            |        |                   |
| The teachers are fair                                                                     | 0.643            |        |                   |
| Teachers let child know when doing well                                                   | 0.620            |        |                   |
| My child has a teacher talk upset or angry                                                | 0.585            |        |                   |
| My child's school or teachers celebrate achievements                                      | 0.576            |        |                   |
| <b>Engagement</b>                                                                         |                  |        |                   |
| My child likes learning at school                                                         |                  | 0.822  |                   |
| Trying hard at school is important to my child                                            |                  | 0.738  |                   |
| My child is interested in what they learn at school                                       | 0.367            | 0.648  |                   |
| My child doesn't like going to school                                                     |                  | -0.448 | 0.353             |
| My child finishes work on time                                                            |                  | 0.395  |                   |
| <b>Belonging</b>                                                                          |                  |        |                   |
| My child is lonely at school                                                              |                  |        | 0.733             |
| My child gets bullied or teased at school                                                 |                  |        | 0.656             |
| <del>My child fits in at school<sup>1</sup></del>                                         | <del>0.358</del> |        | <del>-0.518</del> |
| My child feels different to the other children at their school                            |                  |        | 0.472             |
| My child gets in trouble at school                                                        |                  |        | 0.451             |
| <del>There are children similar to my child in their class<sup>2</sup></del>              |                  |        | <del>-0.353</del> |
| <del>There are other people like my child at their school<sup>2</sup></del>               |                  |        | <del>-0.344</del> |
| <i>My child feels comfortable in identifying with their culture at school<sup>3</sup></i> |                  |        | <i>New</i>        |
| <i>My child's school acknowledges/respects my child's culture<sup>3</sup></i>             |                  |        | <i>New</i>        |

<sup>1</sup> Identified as ambiguous/difficult to answer by respondents and in consultations.

<sup>2</sup> Dropped due to low factor loading and conceptual overlap with item above.

<sup>3</sup> Added after consultations to strengthen scale.

Table 1D. Four-factor solution with maximum likelihood extraction and varimax rotation of the COMMUNITY items.

|                                                                                                                             | Factor           |                  |        |       |
|-----------------------------------------------------------------------------------------------------------------------------|------------------|------------------|--------|-------|
|                                                                                                                             | 1                | 2                | 3      | 4     |
| <b>Connected to culture</b>                                                                                                 |                  |                  |        |       |
| My child is strong because of our culture                                                                                   | 0.773            |                  |        |       |
| <del>My child enjoys taking part in our family traditions<sup>2</sup></del>                                                 | <del>0.766</del> |                  |        |       |
| My child is connected to our family's culture (e.g. food, music, celebrations) <sup>5</sup>                                 | 0.675            |                  |        |       |
| My family's culture makes my child feel special                                                                             | 0.670            | 0.365            |        |       |
| My child likes going to events that celebrate our family's culture                                                          | 0.593            |                  |        |       |
| <del>My child is connected to spirit by being in country<sup>1</sup></del>                                                  | <del>0.518</del> |                  |        | 0.300 |
| <del>My child enjoys going to community events/activities<sup>2</sup></del>                                                 | <del>0.489</del> |                  | 0.438  |       |
| <del>My family tell stories about our family's history<sup>2</sup></del>                                                    | <del>0.469</del> |                  |        |       |
| <del>People in our community come together to celebrate events<sup>2</sup></del>                                            | <del>0.464</del> |                  |        |       |
| <del>Our family culture or values help my child when things are hard<sup>3</sup></del>                                      | <del>New</del>   |                  |        |       |
| <del>My child is connected to elders in our community (e.g. grandparents, aunts/uncles, respected adults)<sup>3</sup></del> | <del>New</del>   |                  |        |       |
| <del>My child looks to their elders (a respected older person) to guide them<sup>3</sup></del>                              | <del>New</del>   |                  |        |       |
| <del>My child is connected to elders (revised above)</del>                                                                  |                  |                  |        | 0.942 |
| <del>My child looks to elders for guidance (revised above)</del>                                                            |                  |                  |        | 0.680 |
| <b>Religion /Spirituality</b>                                                                                               |                  |                  |        |       |
| My child is connected to people through their religion, beliefs or stories                                                  |                  | 0.745            |        |       |
| My child connected to people through our church, mosque or temple                                                           |                  | 0.637            |        |       |
| My child is strong because of their religion or beliefs our family stories, values or spiritual beliefs <sup>3</sup>        |                  | 0.604            |        |       |
| <del>My child goes to a special place with our family<sup>2</sup></del>                                                     | <del>0.464</del> | <del>0.494</del> |        |       |
| <del>Our family talk or yarn about our stories, beliefs or values<sup>3</sup></del>                                         |                  | <del>New</del>   |        |       |
| <del>Our family stories or spiritual beliefs comfort my child when things are hard<sup>3</sup></del>                        |                  | <del>New</del>   |        |       |
| <del>My child can deal with problems better because of our family's beliefs, stories or values<sup>3</sup></del>            |                  | <del>New</del>   |        |       |
| <del>My child is connected to elders in our community (e.g. grandparents, aunts/uncles, respected adults)<sup>3</sup></del> |                  | <del>New</del>   |        |       |
| <b>Community-DROPPED More a measure of socio-economic status</b>                                                            |                  |                  |        |       |
| <del>Our family knows other families where we live</del>                                                                    | <del>0.323</del> |                  | 0.519  |       |
| <del>There are playgrounds or green spaces around where we live</del>                                                       |                  |                  | 0.478  |       |
| <del>I let my child play outside in the streets or parks where we live</del>                                                |                  |                  | 0.471  |       |
| <del>My child feels safe in the area where we live</del>                                                                    |                  |                  | 0.405  |       |
| <del>My child goes to a group or activity in our community</del>                                                            |                  |                  | 0.400  |       |
| <del>My child is involved in our community</del>                                                                            |                  |                  | 0.381  |       |
| <del>My child feels different from others in the commty where we live</del>                                                 |                  |                  | -0.336 |       |
| <del>There are places where we live that my child doesn't feel safe</del>                                                   |                  |                  |        |       |
| <b>Language - opportunity to learn<sup>3</sup></b>                                                                          |                  |                  |        |       |
| My child can speak this language                                                                                            |                  |                  |        | New   |
| My child can understand this language                                                                                       |                  |                  |        | New   |
| Learning this language is important to my child                                                                             |                  |                  |        | New   |
| My child would like to learn more of this language                                                                          |                  |                  |        | New   |
| My child has had the opportunity to learn this language                                                                     |                  |                  |        | New   |
| I encourage my child to learn this language                                                                                 |                  |                  |        | New   |
| <b>Language – connectedness<sup>3</sup></b>                                                                                 |                  |                  |        |       |
| A family member speaks to my child in this language                                                                         |                  |                  |        | New   |
| My child understands when people in our family/community are talking in this language                                       |                  |                  |        | New   |
| My child can easily talk to elders (respected older people) in this language                                                |                  |                  |        | New   |
| My child likes to talk to our family/relatives in this language                                                             |                  |                  |        | New   |
| Understanding this language makes my child feel special                                                                     |                  |                  |        | New   |
| Understanding this language makes my child feel connected to our family or community                                        |                  |                  |        | New   |

<sup>1</sup> Identified as difficult to answer by non-Aboriginal respondents.

<sup>2</sup> Dropped due to low factor loading and/or conceptual overlap.

<sup>3</sup> Added/revised after consultations to strengthen scale.

**STROBE 2007 (v4) Statement—Checklist of items that should be included in reports of *cross-sectional studies***

| Section/Topic                | Item # | Recommendation                                                                                                                                                                       | Reported on page # |
|------------------------------|--------|--------------------------------------------------------------------------------------------------------------------------------------------------------------------------------------|--------------------|
| <b>Title and abstract</b>    | 1      | (a) Indicate the study's design with a commonly used term in the title or the abstract                                                                                               | 2                  |
|                              |        | (b) Provide in the abstract an informative and balanced summary of what was done and what was found                                                                                  | 2                  |
| <b>Introduction</b>          |        |                                                                                                                                                                                      |                    |
| Background/rationale         | 2      | Explain the scientific background and rationale for the investigation being reported                                                                                                 | 4-5                |
| Objectives                   | 3      | State specific objectives, including any prespecified hypotheses                                                                                                                     | 5-6                |
| <b>Methods</b>               |        |                                                                                                                                                                                      |                    |
| Study design                 | 4      | Present key elements of study design early in the paper                                                                                                                              | 5                  |
| Setting                      | 5      | Describe the setting, locations, and relevant dates, including periods of recruitment, exposure, follow-up, and data collection                                                      | 6-7                |
| Participants                 | 6      | (a) Give the eligibility criteria, and the sources and methods of selection of participants                                                                                          | 6-7                |
| Variables                    | 7      | Clearly define all outcomes, exposures, predictors, potential confounders, and effect modifiers. Give diagnostic criteria, if applicable                                             | 8                  |
| Data sources/<br>measurement | 8*     | For each variable of interest, give sources of data and details of methods of assessment (measurement). Describe comparability of assessment methods if there is more than one group | 7-8                |
| Bias                         | 9      | Describe any efforts to address potential sources of bias                                                                                                                            | 5,13               |
| Study size                   | 10     | Explain how the study size was arrived at                                                                                                                                            |                    |
| Quantitative variables       | 11     | Explain how quantitative variables were handled in the analyses. If applicable, describe which groupings were chosen and why                                                         | 9-12               |
| Statistical methods          | 12     | (a) Describe all statistical methods, including those used to control for confounding                                                                                                | 8                  |
|                              |        | (b) Describe any methods used to examine subgroups and interactions                                                                                                                  | 12                 |
|                              |        | (c) Explain how missing data were addressed                                                                                                                                          | 8                  |
|                              |        | (d) If applicable, describe analytical methods taking account of sampling strategy                                                                                                   | N/A                |
|                              |        | (e) Describe any sensitivity analyses                                                                                                                                                | N/A                |
| <b>Results</b>               |        |                                                                                                                                                                                      |                    |

|                          |     |                                                                                                                                                                                                              |                  |
|--------------------------|-----|--------------------------------------------------------------------------------------------------------------------------------------------------------------------------------------------------------------|------------------|
| Participants             | 13* | (a) Report numbers of individuals at each stage of study—eg numbers potentially eligible, examined for eligibility, confirmed eligible, included in the study, completing follow-up, and analysed            | Table 1          |
|                          |     | (b) Give reasons for non-participation at each stage                                                                                                                                                         | N/A              |
|                          |     | (c) Consider use of a flow diagram                                                                                                                                                                           | N/A              |
| Descriptive data         | 14* | (a) Give characteristics of study participants (eg demographic, clinical, social) and information on exposures and potential confounders                                                                     | Table 1          |
|                          |     | (b) Indicate number of participants with missing data for each variable of interest                                                                                                                          | Table 2, Table 3 |
| Outcome data             | 15* | Report numbers of outcome events or summary measures                                                                                                                                                         | Table 3          |
| Main results             | 16  | (a) Give unadjusted estimates and, if applicable, confounder-adjusted estimates and their precision (eg, 95% confidence interval). Make clear which confounders were adjusted for and why they were included | 13               |
|                          |     | (b) Report category boundaries when continuous variables were categorized                                                                                                                                    | 12               |
|                          |     | (c) If relevant, consider translating estimates of relative risk into absolute risk for a meaningful time period                                                                                             | N/A              |
| Other analyses           | 17  | Report other analyses done—eg analyses of subgroups and interactions, and sensitivity analyses                                                                                                               | N/A              |
| <b>Discussion</b>        |     |                                                                                                                                                                                                              |                  |
| Key results              | 18  | Summarise key results with reference to study objectives                                                                                                                                                     | 13               |
| Limitations              | 19  | Discuss limitations of the study, taking into account sources of potential bias or imprecision. Discuss both direction and magnitude of any potential bias                                                   | 13-14            |
| Interpretation           | 20  | Give a cautious overall interpretation of results considering objectives, limitations, multiplicity of analyses, results from similar studies, and other relevant evidence                                   | 15               |
| Generalisability         | 21  | Discuss the generalisability (external validity) of the study results                                                                                                                                        | 15               |
| <b>Other information</b> |     |                                                                                                                                                                                                              |                  |
| Funding                  | 22  | Give the source of funding and the role of the funders for the present study and, if applicable, for the original study on which the present article is based                                                | 1                |

\*Give information separately for cases and controls in case-control studies and, if applicable, for exposed and unexposed groups in cohort and cross-sectional studies.

**Note:** An Explanation and Elaboration article discusses each checklist item and gives methodological background and published examples of transparent reporting. The STROBE checklist is best used in conjunction with this article (freely available on the Web sites of PLoS Medicine at <http://www.plosmedicine.org/>, Annals of Internal Medicine at <http://www.annals.org/>, and Epidemiology at <http://www.epidem.com/>). Information on the STROBE Initiative is available at [www.strobe-statement.org](http://www.strobe-statement.org).
