# Supplementary material for: Development and validation of a multidimensional, culturally and socially inclusive Child Resilience Questionnaire (parent/caregiver report) to measure factors that support resilience: a community-based participatory research and psychometric testing study in Australia
Source: PubMed Central journal article supplement — BMJ Open. 2022 Jun 20;12(6):e061129. doi: 10.1136/bmjopen-2022-061129 (PMC9214413; doi:10.1136/bmjopen-2022-061129), 2022-06-20
Supplement: bmjopen-2022-061129.reviewer_comments.pdf [file bmjopen-2022-061129.reviewer_comments.pdf]

## PEER REVIEW HISTORY

BMJ Open publishes all reviews undertaken for accepted manuscripts. Reviewers are asked to complete a checklist review form (<http://bmjopen.bmj.com/site/about/resources/checklist.pdf>) and are provided with free text boxes to elaborate on their assessment. These free text comments are reproduced below.

### ARTICLE DETAILS

|                            |                                                                                                                                                                                                                                                                               |
|----------------------------|-------------------------------------------------------------------------------------------------------------------------------------------------------------------------------------------------------------------------------------------------------------------------------|
| <b>TITLE (PROVISIONAL)</b> | Development and validation of a multidimensional, culturally and socially inclusive Child Resilience Questionnaire (parent/caregiver report) to measure factors that support resilience: a community-based participatory research and psychometric testing study in Australia |
| <b>AUTHORS</b>             | Gartland, Deirdre; Riggs, Elisha; Giallo, Rebecca; Glover, Karen; Stowe, Mardi; Mongta, Sharon; Weetra, Donna; Brown, Stephanie                                                                                                                                               |

### VERSION 1 – REVIEW

|                        |                                           |
|------------------------|-------------------------------------------|
| <b>REVIEWER</b>        | Julia Dray<br>The University of Newcastle |
| <b>REVIEW RETURNED</b> | 11-Nov-2021                               |

|                         |                                                                                                                                                                                                                                                                                                                                                                                                                                                                                                                                                                                                                                                                                                                                                                                                                                                                                                                                                                                                                                                                                                                                                                                                                                                                                                                                                                                                                                                                                                                                                                                                                                                                                                                                                                                                                                                                                                                                                                 |
|-------------------------|-----------------------------------------------------------------------------------------------------------------------------------------------------------------------------------------------------------------------------------------------------------------------------------------------------------------------------------------------------------------------------------------------------------------------------------------------------------------------------------------------------------------------------------------------------------------------------------------------------------------------------------------------------------------------------------------------------------------------------------------------------------------------------------------------------------------------------------------------------------------------------------------------------------------------------------------------------------------------------------------------------------------------------------------------------------------------------------------------------------------------------------------------------------------------------------------------------------------------------------------------------------------------------------------------------------------------------------------------------------------------------------------------------------------------------------------------------------------------------------------------------------------------------------------------------------------------------------------------------------------------------------------------------------------------------------------------------------------------------------------------------------------------------------------------------------------------------------------------------------------------------------------------------------------------------------------------------------------|
| <b>GENERAL COMMENTS</b> | <p>Thank you for the opportunity to review this study. Research incorporating consultation and engagement of Aboriginal and refugee people is extremely needed and important, especially in the space of resilience measures where the authors correctly note that research is limited. It was great to see that the original lengthy tool was condensed into 43 items, effectively a quarter of the length. However, this still remains a long tool, especially if included in school-based, parental or child report survey including other measures. Unfortunately, I think comparison of the CRQ to the SDQ is a fundamental flaw of the study. The first measures resilience, however the latter, the SDQ, is a measure of mental health problems, not resilience. Thus the authors are incorrectly validating a resilience measure against a mental health measure, and therefore I cannot recommend this paper for publication without substantial changes to the validation component of the study.</p> <p>Intro<br/>The first two paragraphs flow well. In the third paragraph I'd encourage the authors to soften the second sentence, as the listed causes of life stress are not definitive/exhaustive of every possible one but rather examples of some severe adversity or life stress. Similarly the sentence bringing in third Nations is somewhat surprising but could be integrated better if in the first sentence these are worked in e.g. 'Some communities such as First Nations people and refugees...'</p> <p>Methods<br/>Wondering if you are able to map the many working groups and their number and type of participants into a diagram to make this more digestible? It is clear many important consultations were had, however it is hard for the reader to tease apart the many groups, their participants and also possibly their purpose – would a reader know what a working group is, as opposed to an advisory group if</p> |
|-------------------------|-----------------------------------------------------------------------------------------------------------------------------------------------------------------------------------------------------------------------------------------------------------------------------------------------------------------------------------------------------------------------------------------------------------------------------------------------------------------------------------------------------------------------------------------------------------------------------------------------------------------------------------------------------------------------------------------------------------------------------------------------------------------------------------------------------------------------------------------------------------------------------------------------------------------------------------------------------------------------------------------------------------------------------------------------------------------------------------------------------------------------------------------------------------------------------------------------------------------------------------------------------------------------------------------------------------------------------------------------------------------------------------------------------------------------------------------------------------------------------------------------------------------------------------------------------------------------------------------------------------------------------------------------------------------------------------------------------------------------------------------------------------------------------------------------------------------------------------------------------------------------------------------------------------------------------------------------------------------|

|  |                                                                                                                                                                                                                                                                                                                                                                                                                                                                                                                                                                                                                                                                                                                                                                                                                                                                                                                                                                                                                                                                                                                                                                                                                                                                                                                                                                                                                                                                                                                                                                                                                                                                                                                                                                                                                                                                                                                                                                                                                 |
|--|-----------------------------------------------------------------------------------------------------------------------------------------------------------------------------------------------------------------------------------------------------------------------------------------------------------------------------------------------------------------------------------------------------------------------------------------------------------------------------------------------------------------------------------------------------------------------------------------------------------------------------------------------------------------------------------------------------------------------------------------------------------------------------------------------------------------------------------------------------------------------------------------------------------------------------------------------------------------------------------------------------------------------------------------------------------------------------------------------------------------------------------------------------------------------------------------------------------------------------------------------------------------------------------------------------------------------------------------------------------------------------------------------------------------------------------------------------------------------------------------------------------------------------------------------------------------------------------------------------------------------------------------------------------------------------------------------------------------------------------------------------------------------------------------------------------------------------------------------------------------------------------------------------------------------------------------------------------------------------------------------------------------|
|  | <p>they had never utilized such terms in their own research? Such details would also be hugely helpful for other research groups to have enough detail to consider modelling the cultural review process utilized in this study.</p> <p>In your description of cous groups and the systematic review (ref 20) – I would more clearly note this as related or past work of the authors, as this is a strength of the study, to show that this is a thorough and linked body of work, as opposed to using other peoples pieces of work.</p> <p>In the section describing the four samples for the pilot study, it comes across clear that 1 and 2 were Aboriginal communities, however perhaps detail of whether 3 and 4 included Aboriginal and/or refugee participants would also strengthen this to demonstrate sensibility/relevance of the sample used. This similarly applies when describing samples 3 and 4 of the validation study. If they do not include Aboriginal and/or Refugee participants please note this and briefly state why they were still included in the sample of the study.</p> <p>The abstract notes that the original CRQ has 160 items, however in the methods this is noted as 169 items. Please align the values at each mention.</p> <p>Great to see participants were not excluded on English language proficiency and that translators were engaged to help NESB participants take part.</p> <p>The SDQ has been incorrectly identified as a measure of resilience, rather it is a measure of mental health problems. Therefore it is not an appropriate tool to validate the CRQ against. The authors need to remove validation from the study, or conduct validation with an appropriate resilience scale e.g. Resilience and Youth Development Module of the California Healthy Kids Survey.</p> <p>Discussion</p> <p>The above major change to study design may substantially change the discussion, therefore I have not commented on this section.</p> <p>Thank you.</p> |
|--|-----------------------------------------------------------------------------------------------------------------------------------------------------------------------------------------------------------------------------------------------------------------------------------------------------------------------------------------------------------------------------------------------------------------------------------------------------------------------------------------------------------------------------------------------------------------------------------------------------------------------------------------------------------------------------------------------------------------------------------------------------------------------------------------------------------------------------------------------------------------------------------------------------------------------------------------------------------------------------------------------------------------------------------------------------------------------------------------------------------------------------------------------------------------------------------------------------------------------------------------------------------------------------------------------------------------------------------------------------------------------------------------------------------------------------------------------------------------------------------------------------------------------------------------------------------------------------------------------------------------------------------------------------------------------------------------------------------------------------------------------------------------------------------------------------------------------------------------------------------------------------------------------------------------------------------------------------------------------------------------------------------------|

|                        |                              |
|------------------------|------------------------------|
| <b>REVIEWER</b>        | Peter B. Gray<br>Univ Nevada |
| <b>REVIEW RETURNED</b> | 07-Dec-2021                  |

|                         |                                                                                                                                                                                                                                                                                                                                                                                                                                                                                                                                                                                                                                                                                                                                                                                                                                                                                                                                                                                                                                                                                                                                                                                                                                                                                                       |
|-------------------------|-------------------------------------------------------------------------------------------------------------------------------------------------------------------------------------------------------------------------------------------------------------------------------------------------------------------------------------------------------------------------------------------------------------------------------------------------------------------------------------------------------------------------------------------------------------------------------------------------------------------------------------------------------------------------------------------------------------------------------------------------------------------------------------------------------------------------------------------------------------------------------------------------------------------------------------------------------------------------------------------------------------------------------------------------------------------------------------------------------------------------------------------------------------------------------------------------------------------------------------------------------------------------------------------------------|
| <b>GENERAL COMMENTS</b> | <p>This manuscript reports on the development of a Child Resilience Questionnaire to be completed by parents/caregivers (CRQ-P/C). The manuscript is well-written, structured well, and conveys clearly the key steps in the questionnaire piloting and validating process. The manuscript has several key strengths. One is that it was developed with the inclusion of migrant and Aboriginal community involvement, helping make the questionnaire more inclusive and likely useful and generalizable. Another strength is that the rigorous steps for questionnaire design were pursued and shared, with those steps including confirmatory factor analysis and testing for construct validity with the Strengths and Difficulties Questionnaire. A third strength is that such questionnaires are wanting for children of the targeted middle childhood age range: 7-12 years of age. The methodological focus of the research is also contextualized well in the broader literature, both in the Introduction and Discussion. Due to the perceived quality of the work, I have few recommendations for revision, and feel this manuscript will make a useful contribution to the childhood and resilience literatures.</p> <p>I was surprised that findings were not also depicted by group</p> |
|-------------------------|-------------------------------------------------------------------------------------------------------------------------------------------------------------------------------------------------------------------------------------------------------------------------------------------------------------------------------------------------------------------------------------------------------------------------------------------------------------------------------------------------------------------------------------------------------------------------------------------------------------------------------------------------------------------------------------------------------------------------------------------------------------------------------------------------------------------------------------------------------------------------------------------------------------------------------------------------------------------------------------------------------------------------------------------------------------------------------------------------------------------------------------------------------------------------------------------------------------------------------------------------------------------------------------------------------|

|  |                                                                                                                                                                                                                                                                                                                                                                                                                                                                                                                                                                                                                                                                                                                                                                                                                                                                                                                                                                                                                                                                                                                                                                                                                                                                                                                                                                                                                                                                                                                                                                                                                                                                                                                                                                                                                                                                                                                                                                                                                                                                                                                                                                                                                                                                                                                                                                                                                                                                                                                                                                                                                                                                                         |
|--|-----------------------------------------------------------------------------------------------------------------------------------------------------------------------------------------------------------------------------------------------------------------------------------------------------------------------------------------------------------------------------------------------------------------------------------------------------------------------------------------------------------------------------------------------------------------------------------------------------------------------------------------------------------------------------------------------------------------------------------------------------------------------------------------------------------------------------------------------------------------------------------------------------------------------------------------------------------------------------------------------------------------------------------------------------------------------------------------------------------------------------------------------------------------------------------------------------------------------------------------------------------------------------------------------------------------------------------------------------------------------------------------------------------------------------------------------------------------------------------------------------------------------------------------------------------------------------------------------------------------------------------------------------------------------------------------------------------------------------------------------------------------------------------------------------------------------------------------------------------------------------------------------------------------------------------------------------------------------------------------------------------------------------------------------------------------------------------------------------------------------------------------------------------------------------------------------------------------------------------------------------------------------------------------------------------------------------------------------------------------------------------------------------------------------------------------------------------------------------------------------------------------------------------------------------------------------------------------------------------------------------------------------------------------------------------------|
|  | <p>backgrounds (e.g., Aboriginals, migrants) and childhood age to help show the patterning of the CRQ-P/C. At the same time, the multiple recruitment methods for validation limit the value of direct comparisons by such characteristics, instead favoring future work with more targeted recruitment to show such patterning. Please comment on this briefly in the manuscript.</p> <p>A limitation is that there were no child self-report scores. While recognizing this might be easier for 12 year olds than 7 year olds, please add this as a limitation to the end of the Discussion preceding the Conclusion.</p> <p>Given other research recognizing the importance of peer relationships and friendships to middle childhood, it was notable that friends did not appear prominently in the piloting and validation processes of this questionnaire. The Friends element remained within School but not on its own. Perhaps citing a couple of references on middle childhood and peer relationships and friendships, please touch on this briefly in the Discussion, with an illustration of a relevant reference below.</p> <p>Also briefly in the Discussion, please touch on some other key aspects of resiliency. One issue is resiliency to what: to food insecurity, peer racism, family death, physical abuse, etc. and whether one would expect this questionnaire to be of equal use for the varied challenges facing children and for which resilience may help them respond. Another issue is the temporality of resilience--to the immediate challenge vs. perhaps part of life course "canalization" of variable downstream trajectories (e.g., the developmental set point model of Del Giudice, with reference below). Given that such facets are outside the immediate scope of the questionnaire development, but also relevant to the context for the questionnaire's use and value, a paragraph on these kinds of items in the Discussion may suffice.</p> <p>Minor edit: the sentence near the top of p. 8 that reads "Employment of Aboriginal staff and bicultural workers to conduct research in their communities and consult on the measure/scales/items and findings at each stage." is incomplete; please add something like "took place" before "at each stage."</p> <p>Maunder, R., &amp; Monks, C. P. (2019). Friendships in middle childhood: Links to peer and school identification, and general self-worth. <i>British Journal of Developmental Psychology</i>, 37(2), 211-229.</p> <p>Del Giudice, M. (2018). Middle childhood: An evolutionary-developmental synthesis. <i>Handbook of life course health development</i>, 95-107.</p> |
|--|-----------------------------------------------------------------------------------------------------------------------------------------------------------------------------------------------------------------------------------------------------------------------------------------------------------------------------------------------------------------------------------------------------------------------------------------------------------------------------------------------------------------------------------------------------------------------------------------------------------------------------------------------------------------------------------------------------------------------------------------------------------------------------------------------------------------------------------------------------------------------------------------------------------------------------------------------------------------------------------------------------------------------------------------------------------------------------------------------------------------------------------------------------------------------------------------------------------------------------------------------------------------------------------------------------------------------------------------------------------------------------------------------------------------------------------------------------------------------------------------------------------------------------------------------------------------------------------------------------------------------------------------------------------------------------------------------------------------------------------------------------------------------------------------------------------------------------------------------------------------------------------------------------------------------------------------------------------------------------------------------------------------------------------------------------------------------------------------------------------------------------------------------------------------------------------------------------------------------------------------------------------------------------------------------------------------------------------------------------------------------------------------------------------------------------------------------------------------------------------------------------------------------------------------------------------------------------------------------------------------------------------------------------------------------------------------|

**VERSION 1 – AUTHOR RESPONSE**

|                                                                                         |                                                      |
|-----------------------------------------------------------------------------------------|------------------------------------------------------|
| Reviewer: 1                                                                             |                                                      |
| <b>Intro</b>                                                                            |                                                      |
| The first two paragraphs flow well. In the third paragraph I'd encourage the authors to | We have softened the second sentence and revised the |

|                                                                                                                                                                                                                                                                                                                                                                                                                                                                                                                                                                                                                                                                                                 |                                                                                                                                                                                                                                                                                                                                                                                                                                                                                                                                                                                 |
|-------------------------------------------------------------------------------------------------------------------------------------------------------------------------------------------------------------------------------------------------------------------------------------------------------------------------------------------------------------------------------------------------------------------------------------------------------------------------------------------------------------------------------------------------------------------------------------------------------------------------------------------------------------------------------------------------|---------------------------------------------------------------------------------------------------------------------------------------------------------------------------------------------------------------------------------------------------------------------------------------------------------------------------------------------------------------------------------------------------------------------------------------------------------------------------------------------------------------------------------------------------------------------------------|
| <p>soften the second sentence, as the listed causes of life stress are not</p> <p>definitive/exhaustive of every possible one but rather examples of some severe</p> <p>adversity or life stress. Similarly, the sentence bringing in third Nations is somewhat</p> <p>surprising but could be integrated better if in the first sentence these are worked in e.g.</p> <p>'Some communities such as First Nations people and refugees...</p>                                                                                                                                                                                                                                                    | <p>paragraph as advised:</p> <p>Some communities including First Nations and refugee communities, experience a significantly higher cumulative load of early life stress and adversity. This can be linked to the impacts of colonisation, persecution, experiences of war, social disadvantage and intergenerational trauma. Despite these experiences, many of these communities demonstrate resilience, (16-19) but are poorly represented in the existing child resilience literature - as demonstrated in a systematic review conducted as part of this study.(20) ...</p> |
| <p><b>Methods</b></p>                                                                                                                                                                                                                                                                                                                                                                                                                                                                                                                                                                                                                                                                           |                                                                                                                                                                                                                                                                                                                                                                                                                                                                                                                                                                                 |
| <p>Wondering if you are able to map the many working groups and their number and type</p> <p>of participants into a diagram to make this more digestible? It is clear many important</p> <p>consultations were had, however it is hard for the reader to tease apart the many</p> <p>groups, their participants and also possibly their purpose – would a reader know what a</p> <p>working group is, as opposed to an advisory group if they had never utilized such terms</p> <p>in their own research? Such details would also be hugely helpful for other research</p> <p>groups to have enough detail to consider modelling the cultural review process utilized</p> <p>in this study.</p> | <p>The paper is long and we were obviously too brief in this section. While a diagram would be very cumbersome due to the many consultations conducted throughout the study, we hope we have made it clearer by adding more detail as follows:</p> <p>Throughout every stage of the study, the following processes were used to embed community consultation, engagement and co-design. The study was conducted in partnership with the Aboriginal Health Council of South Australia, an Aboriginal family support unit at the hospital, and the lead provider of</p>           |

|  |                                                                                                                                                                                                                                                                                                                                                                                                                                                                                                                                                               |
|--|---------------------------------------------------------------------------------------------------------------------------------------------------------------------------------------------------------------------------------------------------------------------------------------------------------------------------------------------------------------------------------------------------------------------------------------------------------------------------------------------------------------------------------------------------------------|
|  | <p>refugee counselling services in Victoria. These partners were involved in the funding application and study design as recommended in community consultation guidelines.(36-38)</p> <p>Working groups involving academic and non-academic (partner) study investigators were established to co-design research processes. The Aboriginal working group involved Aboriginal researchers, Aboriginal and non-Aboriginal study investigators, and representatives of partner organisations.</p> <p>The refugee working group involved study investigators,</p> |
|  | <p>representatives of partner organisations, staff from the</p>                                                                                                                                                                                                                                                                                                                                                                                                                                                                                               |
|  | <p>hospital's Immigrant Health Centre, refugee advocates and</p>                                                                                                                                                                                                                                                                                                                                                                                                                                                                                              |
|  | <p>bicultural researchers employed on the study. Aboriginal</p>                                                                                                                                                                                                                                                                                                                                                                                                                                                                                               |
|  | <p>researchers or bicultural workers were employed to work with</p>                                                                                                                                                                                                                                                                                                                                                                                                                                                                                           |
|  | <p>their communities and networks to advertise the study and</p>                                                                                                                                                                                                                                                                                                                                                                                                                                                                                              |
|  | <p>recruit families. As a member of the community, they ensured</p>                                                                                                                                                                                                                                                                                                                                                                                                                                                                                           |
|  | <p>that the recruitment, consent and questionnaire</p>                                                                                                                                                                                                                                                                                                                                                                                                                                                                                                        |
|  | <p>administration were conducted in ways that promoted</p>                                                                                                                                                                                                                                                                                                                                                                                                                                                                                                    |
|  | <p>cultural safety and trust, including speaking to families in their</p>                                                                                                                                                                                                                                                                                                                                                                                                                                                                                     |
|  | <p>preferred language.</p>                                                                                                                                                                                                                                                                                                                                                                                                                                                                                                                                    |
|  |                                                                                                                                                                                                                                                                                                                                                                                                                                                                                                                                                               |

|                                                                                               |                                                                 |
|-----------------------------------------------------------------------------------------------|-----------------------------------------------------------------|
| In your description of your groups and the systematic review (ref 20) – I would more          | Thank you. We have added as follows:                            |
| clearly note this as related or past work of the authors, as this is a strength of the study, | Despite these experiences, many of these communities            |
| to show that this is a thorough and linked body of work, as opposed to using other            | demonstrate resilience, (16-19) but are poorly represented in   |
| peoples pieces of work.                                                                       | the existing child resilience literature - as demonstrated in a |
|                                                                                               | systematic review conducted as part of this study.(20)          |
| In the section describing the four samples for the pilot study, it comes across clear that    | The Child Resilience Questionnaire was developed for use in     |
| 1 and 2 were Aboriginal communities, however perhaps detail of whether 3 and 4                | community and population-based studies and settings. We         |
| included Aboriginal and/or refugee participants would also strengthen this to                 | included targeted over sampling of Aboriginal and refugee       |
| demonstrate sensibility/relevance of the sample used. This similarly applies when             | background families to expand the relevance of the              |
| describing samples 3 and 4 of the validation study. If they do not include Aboriginal         | questionnaire to families from diverse backgrounds, and         |
| and/or Refugee participants please note this and briefly state why they were still            | families that are often excluded from research as “hard to      |
| included in the sample of the study.                                                          | reach”.                                                         |
|                                                                                               | We have attempted to make this clearer, by rewriting the        |
|                                                                                               | start of the methods section as follows:                        |
|                                                                                               | The study was designed to develop a socially inclusive,         |
|                                                                                               | multidimensional measure of resilience in children that was     |
|                                                                                               | relevant to a range of contexts in which children may           |
|                                                                                               | encounter adversity and show resilience. Two methodological     |
|                                                                                               | approaches ensured participation by families with diverse       |

|                                                                                        |                                                                 |
|----------------------------------------------------------------------------------------|-----------------------------------------------------------------|
|                                                                                        | social and cultural backgrounds, adversity exposures and        |
|                                                                                        | resilience factors. 1) the questionnaire was co-designed with   |
|                                                                                        | Aboriginal and refugee background communities; and 2)           |
|                                                                                        | families were recruited from outpatient clinics in a large      |
|                                                                                        | public tertiary hospital. Public hospitals provide free         |
|                                                                                        | healthcare, and the clinics are attended by large numbers of    |
|                                                                                        | families every day, including urban and rural based families,   |
|                                                                                        | with significant variation in economic, cultural and social     |
|                                                                                        | backgrounds.                                                    |
| The abstract notes that the original CRQ has 160 items, however in the methods this is | Typo has been corrected. Thank you.                             |
| noted as 169 items. Please align the values at each mention.                           |                                                                 |
| Great to see participants were not excluded on English language proficiency and that   | Thank you.                                                      |
| translators were engaged to help NESB participants take part.                          |                                                                 |
| The SDQ has been incorrectly identified as a measure of resilience, rather it is a     | We agree, this is a really important point.                     |
| measure of mental health problems. Therefore it is not an appropriate tool to validate | As noted in the paper, at the time of designing and conducting  |
| the CRQ against. The authors need to remove validation from the study, or conduct      | the study, there was no other measure of child resilience       |
| validation with an appropriate resilience scale e.g. Resilience and Youth Development  | available. Our review of the available literature (conducted to |
| Module of the California Healthy Kids Survey.                                          | inform this study) is published in BMJ Open (Gartland D et al,  |
|                                                                                        | 2019) and is a very highly cited paper.                         |
|                                                                                        | Given the lack of a gold standard                               |

|  |                                                                |
|--|----------------------------------------------------------------|
|  | measure, we chose the SDQ                                      |
|  | as it was (and is) the most commonly used measure of child     |
|  | wellbeing, and because it is frequently used as a proxy for    |
|  | identifying resilience.                                        |
|  | We provide a detailed rationale for this decision in the paper |
|  | discussion and methods and acknowledge it both as a            |
|  | limitation and an area for further investigation in the        |
|  | discussion. The Resilience and Youth Development Module        |
|  | (2007) and the recent publication of the Child and Youth       |
|  | Resilience Measure are potential candidates for criterion      |
|  | testing. However, both measures were developed with            |
|  | secondary school students, and neither was inclusive of First  |
|  | Nations or refugee families. So, while these measures will be  |
|  | used for future validation, there remains no 'gold standard'   |
|  | comparison measure for our unique socially inclusive           |
|  | resilience measure for primary school students.                |
|  | To make the point more strongly, we have revised the           |
|  | mention in the limitations as follows:                         |
|  | While we were able to assess criterion validity using the SDQ  |



|                                                                                            |                                                                  |
|--------------------------------------------------------------------------------------------|------------------------------------------------------------------|
|                                                                                            | as a proxy measure of resilience, this is not a measure of       |
|                                                                                            | resilience. No such measure existed at the time of the study.    |
|                                                                                            | Further assessment against new child resilience measures will    |
|                                                                                            | enable more rigorous assessment.                                 |
| Reviewer: 2                                                                                |                                                                  |
| I was surprised that findings were not also depicted by group backgrounds (e.g.,           | Yes we will be investigating this aspect in future analyses of   |
| Aboriginals, migrants) and childhood age to help show the patterning of the CRQ-P/C.       | these data. It was beyond the scope of this already long and     |
| At the same time, the multiple recruitment methods for validation limit the value of       | complicated paper to describe our development processes.         |
| direct comparisons by such characteristics, instead favoring future work with more         |                                                                  |
| targeted recruitment to show such patterning. Please comment on this briefly in the        | In reference to examining patterning by group backgrounds        |
| manuscript.                                                                                | and age etc, we have added the following in the discussion:      |
|                                                                                            | Availability of the multidomain Child Resilience Questionnaire   |
|                                                                                            | will facilitate investigation of the importance of specific      |
|                                                                                            | resilience factors, such as friends, in different contexts (e.g. |
|                                                                                            | Aboriginal families) or adversities (e.g. family violence        |
|                                                                                            | exposure) to advance our understanding of child resilience       |
|                                                                                            | and how to support positive outcomes in the face of adversity.   |
| A limitation is that there were no child self-report scores. While recognizing this might  | This is the first paper describing the CRQ-P/C report. A second  |
| be easier for 12 year olds than 7 year olds, please add this as a limitation to the end of | paper has also been submitted describing the self-report         |

|                                                                                        |                                                                 |
|----------------------------------------------------------------------------------------|-----------------------------------------------------------------|
| the Discussion preceding the Conclusion.                                               | version for children aged 7-12 years. It was not possible to    |
|                                                                                        | include both in a single paper.                                 |
|                                                                                        | We have added this to the limitations and attempted to make     |
|                                                                                        | this clearer in the method's CRQ development section:           |
|                                                                                        | Limitations                                                     |
|                                                                                        | It was beyond the scope of this paper to also report on the     |
|                                                                                        | child report CRQ (CRQ-C) against the CRQ-P/C, but this is       |
|                                                                                        | underway.                                                       |
|                                                                                        | Methods                                                         |
|                                                                                        | ...While space limits this paper to describing the CRQ-P/C,     |
|                                                                                        | publication of the CRQ-C and CRQ-S will follow.                 |
| Given other research recognizing the importance of peer relationships and friendships  | We have explored this in more detail in the CRQ-C paper, and    |
| to middle childhood, it was notable that friends did not appear prominently in the     | agree it is a gap here. Thank you for bringing these resources  |
| piloting and validation processes of this questionnaire. The Friends element remained  | to our attention, particularly Del Giudice (2018). We have      |
| within School but not on its own. Perhaps citing a couple of references on middle      | referred to them in the introduction (Del Giudice, M. 2018)     |
| childhood and peer relationships and friendships, please touch on this briefly in the  | and discussion (both).                                          |
| Discussion, with an illustration of a relevant reference below.                        |                                                                 |
| Maunder, R., & Monks, C. P. (2019). Friendships in middle childhood: Links to peer and | We have added:                                                  |
| school identification, and general self-worth. British Journal of Developmental        | Finally, the friends scale was not strongly consistent across   |
| Psychology, 37(2), 211-229.                                                            | the revisions but showed excellent scale reliability with three |

|                                                                                             |                                                                   |
|---------------------------------------------------------------------------------------------|-------------------------------------------------------------------|
| Del Giudice, M. (2018). Middle childhood: An evolutionary-developmental synthesis.          | items. While friendships in middle childhood have been            |
| Handbook of life course health development, 95-107.                                         | highlighted as developmentally important (DelGuidice, 2018)       |
|                                                                                             | and associated with positive self-worth and school                |
|                                                                                             | engagement(Maunders & Monks, 2019), most investigation in         |
|                                                                                             | terms of resilience has been with adolescents(Pawelby et al,      |
|                                                                                             | 1997, Lansford et al, 2003, Haddow, 2021). Availability of the    |
|                                                                                             | multidomain Child Resilience Questionnaire will facilitate        |
|                                                                                             | investigation of the importance of specific resilience factors,   |
|                                                                                             | such as friends, in different contexts (e.g. Aboriginal families) |
|                                                                                             | or adversities (e.g. family violence exposure) to advance our     |
|                                                                                             | understanding of child resilience and how to support positive     |
|                                                                                             | outcomes in the face of adversity.                                |
| Also briefly in the Discussion, please touch on some other key aspects of resiliency. One   | We have added more detail about how we see the                    |
| issue is resiliency to what: to food insecurity, peer racism, family death, physical abuse, | questionnaire to be useful across varied challenges and how       |
| etc. and whether one would expect this questionnaire to be of equal use for the varied      | resilience may be conceptualized using the measure.               |
| challenges facing children and for which resilience may help them respond. Another          |                                                                   |
| issue is the temporality of resilience--to the immediate challenge vs. perhaps part of life | Conclusion                                                        |
| course "canalization" of variable downstream trajectories (e.g., the developmental set      | Resilience was originally seen as a static characteristic of an   |
| point model of Del Giudice, with reference below). Given that such facets are outside       | individual – unique heroic figures achieving remarkable things    |

|                                                                                       |                                                                 |
|---------------------------------------------------------------------------------------|-----------------------------------------------------------------|
| the immediate scope of the questionnaire development, but also relevant to the        | despite tragic childhoods. It is now better conceptualized as a |
| context for the questionnaire's use and value, a paragraph on these kinds of items in | more 'ordinary magic'.(Masten, 2013) A dynamic process of       |
| the Discussion may suffice.                                                           | drawing on internal and external resources to adapt, recover    |
|                                                                                       | or thrive despite adverse experiences. Thus children who have   |
|                                                                                       | access to resilience factors within themselves, and in their    |
|                                                                                       | family, school and community will fare better in the face of    |
|                                                                                       | adversity, than children who are not similarly resourced. The   |
|                                                                                       | CRQ-P/C is the first culturally and socially inclusive, multi-  |
|                                                                                       | domain measure of child resilience that reflects this paradigm  |
|                                                                                       | shift. The measure will facilitate investigation of a child's   |
|                                                                                       | strengths or vulnerabilities across different aspects of their  |
|                                                                                       | socio-ecological world. Availability of the first               |
|                                                                                       | developmentally appropriate child measure with                  |
|                                                                                       | demonstrated content, construct validity, reliability and       |
|                                                                                       | criterion validity will facilitate understanding of resilience  |
|                                                                                       | across settings, contexts, adversities, and countries.          |
|                                                                                       |                                                                 |
| Minor edit: the sentence near the top of p. 8 that reads "Employment of Aboriginal    | We have revised this sentence as follows (reviewer 1 also       |
| staff and bicultural workers to conduct research in their                             | requested greater detail in this section):                      |

|                                                                                 |                                                                    |
|---------------------------------------------------------------------------------|--------------------------------------------------------------------|
| communities and consult on                                                      |                                                                    |
| the measure/scales/items and findings at each stage." is incomplete; please add | Aboriginal researchers or bicultural workers were employed         |
| something like "took place" before "at each stage."                             | to work with their communities and networks to advertise the       |
|                                                                                 | study and recruit families. As a member of the community,          |
|                                                                                 | they ensured that the recruitment, consent and questionnaire       |
|                                                                                 | administration were conducted in ways that promoted                |
|                                                                                 | cultural safety and trust, including speaking to families in their |
|                                                                                 | preferred language.                                                |

#### VERSION 2 – REVIEW

|                        |                                                                         |
|------------------------|-------------------------------------------------------------------------|
| <b>REVIEWER</b>        | Lucy Griffiths<br>Swansea University, Swansea University Medical School |
| <b>REVIEW RETURNED</b> | 21-Mar-2022                                                             |

|                         |                                                                                                                                                                                                                                                                                                                                                                                                                                                                                                                                                                                                                                                                                                                                                                                                                                               |
|-------------------------|-----------------------------------------------------------------------------------------------------------------------------------------------------------------------------------------------------------------------------------------------------------------------------------------------------------------------------------------------------------------------------------------------------------------------------------------------------------------------------------------------------------------------------------------------------------------------------------------------------------------------------------------------------------------------------------------------------------------------------------------------------------------------------------------------------------------------------------------------|
| <b>GENERAL COMMENTS</b> | <p>Thank you for the opportunity to review this manuscript. This study, and tool, will clearly be of relevance to those working with Aboriginal and refugee background children and interested in resilience.</p> <p>The authors have comprehensively addressed the comments from both previous reviewers - the manuscript has been improved.</p> <p>Two minor points:</p> <p>'Pilot study to test draft CRQ-P/C' section - 'the pilot follow-up questionnaire completed by mothers/carers of children aged 5-7 years' - the abstract states 5-12 years. Please amend if incorrect in the methods.</p> <p>The reference list needs to be checked - e.g. I do not think the hyperlink for the Kalmakis &amp; Chandler (2015) reference is working (the first takes me to an Ovid login), and the Kaplan (2020) reference needs one adding.</p> |
|-------------------------|-----------------------------------------------------------------------------------------------------------------------------------------------------------------------------------------------------------------------------------------------------------------------------------------------------------------------------------------------------------------------------------------------------------------------------------------------------------------------------------------------------------------------------------------------------------------------------------------------------------------------------------------------------------------------------------------------------------------------------------------------------------------------------------------------------------------------------------------------|

#### VERSION 2 – AUTHOR RESPONSE

|                                                                                                                                                                                            |                                                                                     |
|--------------------------------------------------------------------------------------------------------------------------------------------------------------------------------------------|-------------------------------------------------------------------------------------|
| Reviewer 1.                                                                                                                                                                                |                                                                                     |
| Two minor points:                                                                                                                                                                          |                                                                                     |
| 'Pilot study to test draft CRQ-P/C' section - 'the pilot follow-up questionnaire completed by mothers/carers of children aged 5-7 years' - the abstract states 5-12 years. Please amend if | This is correct – the cohort was followed up as the children were 5-7 years of age. |

|                                                                                                                                                                                                                             |                                             |
|-----------------------------------------------------------------------------------------------------------------------------------------------------------------------------------------------------------------------------|---------------------------------------------|
| incorrect in the methods.                                                                                                                                                                                                   |                                             |
| The reference list needs to be checked - e.g. I do not think the hyperlink for the Kalmakis & Chandler (2015) reference is working (the first takes me to an Ovid login), and the Kaplan (2020) reference needs one adding. | We have checked all references and revised. |
