# Supplementary material for: Development and validation of a multidimensional, culturally and socially inclusive Child Resilience Questionnaire (parent/caregiver report) to measure factors that support resilience: a community-based participatory research and psychometric testing study in Australia
Source: PubMed Central journal article supplement — BMJ Open. 2022 Jun 20;12(6):e061129. doi: 10.1136/bmjopen-2022-061129 (PMC9214413; doi:10.1136/bmjopen-2022-061129), 2022-06-20
Supplement: bmjopen-2022-061129supp001.pdf [file bmjopen-2022-061129supp001.pdf]

## Supplementary Tables 1A – 1D

Table 1A. Four-factor solution with maximum likelihood extraction and varimax rotation of the SELF items.

|                                                                                           | Factor           |                  |                  |                  |
|-------------------------------------------------------------------------------------------|------------------|------------------|------------------|------------------|
|                                                                                           | 1                | 2                | 3                | 4                |
| <b>Managing emotions (positive)</b>                                                       |                  |                  |                  |                  |
| My child knows how to manage their feelings                                               | 0.832            |                  |                  |                  |
| <del>My child is good at solving problems by themselves</del>                             | <del>0.718</del> |                  |                  |                  |
| My child copes well if they have a problem <del>with friends</del> (Revised) <sup>3</sup> | 0.620            | 0.311            |                  |                  |
| My child knows manage worried or anxious                                                  | 0.599            |                  |                  |                  |
| My child knows how to calm down when they feel angry                                      | 0.527            |                  | 0.395            |                  |
| <del>My child copes well problem at home<sup>†</sup></del>                                | <del>0.446</del> | <del>0.301</del> | <del>0.319</del> |                  |
| My child thinks about why things happen                                                   | 0.436            |                  |                  |                  |
| <b>Managing emotions (negative) DROPPED</b>                                               |                  |                  |                  |                  |
| <del>My child worries making a mistake</del>                                              |                  |                  |                  | <del>0.688</del> |
| <del>My child worries about things going wrong</del>                                      |                  |                  |                  | <del>0.665</del> |
| <del>My child wont try things if they might make a mistake</del>                          |                  |                  |                  | <del>0.499</del> |
| <del>My child keeps their feelings inside</del>                                           |                  |                  |                  | <del>0.413</del> |
| <b>Positive Self</b>                                                                      |                  |                  |                  |                  |
| My child is a brave person                                                                |                  | 0.676            |                  |                  |
| My child is a confident person                                                            |                  | 0.625            |                  |                  |
| My child likes to try new things                                                          |                  | 0.610            | 0.332            |                  |
| My child feels good about themself                                                        |                  | 0.559            | 0.438            |                  |
| My child is a strong person on the inside                                                 | 0.315            | 0.524            |                  |                  |
| My child keeps trying even when things get hard                                           | 0.383            | 0.446            |                  |                  |
| <del>My child is happy to be different from other kids</del>                              |                  | <del>0.328</del> |                  |                  |
| <b>Positive Future</b>                                                                    |                  |                  |                  |                  |
| My child is positive about their future                                                   |                  |                  | 0.692            |                  |
| My child is hopeful about their life                                                      |                  |                  | 0.642            |                  |
| My child is positive about their life                                                     |                  |                  | 0.620            |                  |
| My child looks forward to growing up                                                      |                  |                  | 0.469            |                  |
| <del>My child can easily name things they are good at<sup>†</sup></del>                   |                  | <del>0.355</del> | <del>0.373</del> |                  |
| <del>My child tries to work out why things go wrong<sup>†</sup></del>                     |                  | <del>0.301</del> | <del>0.305</del> |                  |

<sup>†</sup> Deleted as low and equal loading on multiple factors.<sup>‡</sup> Retained as consultations identified as conceptually important.<sup>3</sup> Revised to make more general (previously was a similar question for school, home and friends).

Table 1B. Four-factor solution with maximum likelihood extraction and varimax rotation of the FAMILY items.

|                                                                                                  | Factor           |                  |                  |        |
|--------------------------------------------------------------------------------------------------|------------------|------------------|------------------|--------|
|                                                                                                  | 1                | 2                | 3                | 4      |
| <b>Connectedness</b>                                                                             |                  |                  |                  |        |
| My child talks to me about their worries                                                         | 0.809            |                  |                  |        |
| My child talks to me about their feelings                                                        | 0.782            |                  |                  |        |
| My child talks to me about what is happening in their life                                       | 0.753            |                  |                  |        |
| <del>My child feels special in our family<sup>1</sup></del>                                      | <del>0.481</del> | <del>0.433</del> |                  |        |
| <del>I am interested in things that my child likes<sup>1</sup></del>                             | <del>0.424</del> | <del>0.352</del> |                  |        |
| I listen to my child <sup>2</sup>                                                                | 0.374            | 0.452            |                  |        |
| I am close to my child <sup>2</sup>                                                              | 0.364            | 0.379            |                  |        |
| <b>Basic needs</b>                                                                               |                  |                  |                  |        |
| My child feels safe at <i>our</i> home <sup>3</sup>                                              |                  | 0.603            |                  |        |
| My child likes being in our <del>house</del> <i>home</i> <sup>3</sup>                            |                  | 0.522            |                  |        |
| I am able to provide what my child needs                                                         |                  | 0.405            |                  |        |
| My child has their own space in <del>our house</del> <i>the place where we live</i> <sup>3</sup> |                  | 0.373            |                  |        |
| <i>My child feels they belong in the place where we live</i> <sup>4</sup>                        |                  |                  |                  | New    |
| <b>Guidance</b>                                                                                  |                  |                  |                  |        |
| My child helps with things like shopping                                                         |                  |                  | 0.665            |        |
| My child has responsibilities in family                                                          |                  |                  | 0.599            |        |
| I teach my child life skills e.g. money                                                          |                  |                  | 0.564            |        |
| <del>Our family enjoys visiting others<sup>1</sup></del>                                         |                  | <del>0.335</del> | <del>0.421</del> |        |
| Our family has routines                                                                          |                  |                  | 0.351            |        |
| <b>Friends</b>                                                                                   |                  |                  |                  |        |
| My child has a close/best friend                                                                 |                  |                  |                  | 0.637  |
| My child's friends come to our <del>house</del> <i>home</i> <sup>3</sup>                         |                  |                  |                  | 0.612  |
| My child would like to have more friends                                                         |                  |                  |                  | -0.370 |
| My child feels lonely                                                                            |                  |                  |                  | -0.367 |
| <i>My child has a friend they can talk to about their worries</i> <sup>4</sup>                   |                  |                  |                  | New    |
| <i>My child has a group of friends they have fun with</i> <sup>4</sup>                           |                  |                  |                  | New    |
| <i>My child finds it hard making friends</i> <sup>4</sup>                                        |                  |                  |                  | New    |

<sup>1</sup> Deleted as low and equal loading on two factors.<sup>2</sup> Retained as consultations identified as conceptually important.<sup>3</sup> Advised in consultations on wording changes to be more inclusive of different living arrangements, including not having a house.<sup>4</sup> Added through consultations to strengthen scale.

Table 1C. Four Factor solution with maximum likelihood extraction and varimax rotation of the SCHOOL items.

|                                                                                           | Factor           |        |                   |
|-------------------------------------------------------------------------------------------|------------------|--------|-------------------|
|                                                                                           | 1                | 2      | 3                 |
| <b>Teachers</b>                                                                           |                  |        |                   |
| Teachers listen to my child when have a problem                                           | 0.797            |        |                   |
| The teachers help my child when they need it                                              | 0.744            |        |                   |
| The teachers are fair                                                                     | 0.643            |        |                   |
| Teachers let child know when doing well                                                   | 0.620            |        |                   |
| My child has a teacher talk upset or angry                                                | 0.585            |        |                   |
| My child's school or teachers celebrate achievements                                      | 0.576            |        |                   |
| <b>Engagement</b>                                                                         |                  |        |                   |
| My child likes learning at school                                                         |                  | 0.822  |                   |
| Trying hard at school is important to my child                                            |                  | 0.738  |                   |
| My child is interested in what they learn at school                                       | 0.367            | 0.648  |                   |
| My child doesn't like going to school                                                     |                  | -0.448 | 0.353             |
| My child finishes work on time                                                            |                  | 0.395  |                   |
| <b>Belonging</b>                                                                          |                  |        |                   |
| My child is lonely at school                                                              |                  |        | 0.733             |
| My child gets bullied or teased at school                                                 |                  |        | 0.656             |
| <del>My child fits in at school<sup>1</sup></del>                                         | <del>0.358</del> |        | <del>-0.518</del> |
| My child feels different to the other children at their school                            |                  |        | 0.472             |
| My child gets in trouble at school                                                        |                  |        | 0.451             |
| <del>There are children similar to my child in their class<sup>2</sup></del>              |                  |        | <del>-0.353</del> |
| <del>There are other people like my child at their school<sup>2</sup></del>               |                  |        | <del>-0.341</del> |
| <i>My child feels comfortable in identifying with their culture at school<sup>3</sup></i> |                  |        | <i>New</i>        |
| <i>My child's school acknowledges/respects my child's culture<sup>3</sup></i>             |                  |        | <i>New</i>        |

<sup>1</sup> Identified as ambiguous/difficult to answer by respondents and in consultations.<sup>2</sup> Dropped due to low factor loading and conceptual overlap with item above.<sup>3</sup> Added after consultations to strengthen scale.

Table 1D. Four-factor solution with maximum likelihood extraction and varimax rotation of the COMMUNITY items.

|                                                                                                                         | Factor           |                  |        |            |
|-------------------------------------------------------------------------------------------------------------------------|------------------|------------------|--------|------------|
|                                                                                                                         | 1                | 2                | 3      | 4          |
| <b>Connected to culture</b>                                                                                             |                  |                  |        |            |
| My child is strong because of our culture                                                                               | 0.773            |                  |        |            |
| <del>My child enjoys taking part in our family traditions<sup>2</sup></del>                                             | <del>0.766</del> |                  |        |            |
| My child is connected to our family's culture (e.g. food, music, celebrations) <sup>5</sup>                             | 0.675            |                  |        |            |
| My family's culture makes my child feel special                                                                         | 0.670            | 0.365            |        |            |
| My child likes going to events that celebrate our family's culture                                                      | 0.593            |                  |        |            |
| <del>My child is connected to spirit by being in country<sup>1</sup></del>                                              | <del>0.518</del> |                  |        | 0.300      |
| <del>My child enjoys going to community events/activities<sup>2</sup></del>                                             | <del>0.489</del> |                  | 0.438  |            |
| <del>My family tell stories about our family's history<sup>2</sup></del>                                                | <del>0.469</del> |                  |        |            |
| <del>People in our community come together to celebrate events<sup>2</sup></del>                                        | <del>0.464</del> |                  |        |            |
| <i>Our family culture or values help my child when things are hard<sup>3</sup></i>                                      | <i>New</i>       |                  |        |            |
| <i>My child is connected to elders in our community (e.g. grandparents, aunts/uncles, respected adults)<sup>3</sup></i> | <i>New</i>       |                  |        |            |
| <i>My child looks to their elders (a respected older person) to guide them<sup>3</sup></i>                              | <i>New</i>       |                  |        |            |
| <del>My child is connected to elders (revised above)</del>                                                              |                  |                  |        | 0.942      |
| <del>My child looks to elders for guidance (revised above)</del>                                                        |                  |                  |        | 0.680      |
| <b>Religion /Spirituality</b>                                                                                           |                  |                  |        |            |
| My child is connected to people through their religion, beliefs or stories                                              |                  | 0.745            |        |            |
| My child connected to people through our church, mosque or temple                                                       |                  | 0.637            |        |            |
| My child is strong because of their religion or beliefs                                                                 |                  | 0.604            |        |            |
| <del>My child goes to a special place with our family<sup>2</sup></del>                                                 | <del>0.464</del> | <del>0.494</del> |        |            |
| <i>Our family talk or yarn about our stories, beliefs or values<sup>3</sup></i>                                         |                  | <i>New</i>       |        |            |
| <i>Our family stories or spiritual beliefs comfort my child when things are hard<sup>3</sup></i>                        |                  | <i>New</i>       |        |            |
| <i>My child can deal with problems better because of our family's beliefs, stories or values<sup>3</sup></i>            |                  | <i>New</i>       |        |            |
| <i>My child is connected to elders in our community (e.g. grandparents, aunts/uncles, respected adults)<sup>3</sup></i> |                  | <i>New</i>       |        |            |
| <b>Community-DROPPED More a measure of socio-economic status</b>                                                        |                  |                  |        |            |
| <del>Our family knows other families where we live</del>                                                                | <del>0.323</del> |                  | 0.519  |            |
| <del>There are playgrounds or green spaces around where we live</del>                                                   |                  |                  | 0.478  |            |
| <del>I let my child play outside in the streets or parks where we live</del>                                            |                  |                  | 0.471  |            |
| <del>My child feels safe in the area where we live</del>                                                                |                  |                  | 0.405  |            |
| <del>My child goes to a group or activity in our community</del>                                                        |                  |                  | 0.400  |            |
| <del>My child is involved in our community</del>                                                                        |                  |                  | 0.381  |            |
| <del>My child feels different from others in the commty where we live</del>                                             |                  |                  | -0.336 |            |
| <del>There are places where we live that my child doesn't feel safe</del>                                               |                  |                  |        |            |
| <b>Language - opportunity to learn<sup>3</sup></b>                                                                      |                  |                  |        |            |
| <i>My child can speak this language</i>                                                                                 |                  |                  |        | <i>New</i> |
| <i>My child can understand this language</i>                                                                            |                  |                  |        | <i>New</i> |
| <i>Learning this language is important to my child</i>                                                                  |                  |                  |        | <i>New</i> |
| <i>My child would like to learn more of this language</i>                                                               |                  |                  |        | <i>New</i> |
| <i>My child has had the opportunity to learn this language</i>                                                          |                  |                  |        | <i>New</i> |
| <i>I encourage my child to learn this language</i>                                                                      |                  |                  |        | <i>New</i> |
| <b>Language – connectedness<sup>3</sup></b>                                                                             |                  |                  |        |            |
| <i>A family member speaks to my child in this language</i>                                                              |                  |                  |        | <i>New</i> |
| <i>My child understands when people in our family/community are talking in this language</i>                            |                  |                  |        | <i>New</i> |
| <i>My child can easily talk to elders (respected older people) in this language</i>                                     |                  |                  |        | <i>New</i> |
| <i>My child likes to talk to our family/relatives in this language</i>                                                  |                  |                  |        | <i>New</i> |
| <i>Understanding this language makes my child feel special</i>                                                          |                  |                  |        | <i>New</i> |
| <i>Understanding this language makes my child feel connected to our family or community</i>                             |                  |                  |        | <i>New</i> |

<sup>1</sup> Identified as difficult to answer by non-Aboriginal respondents.<sup>2</sup> Dropped due to low factor loading and/or conceptual overlap.<sup>3</sup> Added/revised after consultations to strengthen scale.
